# Supplementary material for: Regioselective transition metal- and halogen-free direct dithiolation at C(sp3)–H of nitrotoluenes with diaryl disulfides
Source: Royal Society of Chemistry journal article supplement (doi:10.1039/c6ob01856d), 2016-01-01
Supplement: c6ob01856d1.pdf [file c6ob01856d1.pdf]

=====

S U P P L E M E N T A R Y   M A T E R I A L

=====

B E L O N G I N G   T O   T H E   P A P E R

## **Regioselective Transition Metal- and Halogen-Free Direct Dithiolation at C(*sp*<sup>3</sup>)-H of Nitrotoluenes with Diaryl Disulfides**

Shailesh Kumar, Rahul Kadu, Sangit Kumar\*

Department of Chemistry, Indian Institute of Science Education and Research Bhopal, Bhopal

By-pass Road, Bhauri, Bhopal 462 066, India

[sangitkumar@iiserb.ac.in](mailto:sangitkumar@iiserb.ac.in)

### **Contents**

|                                                                          |         |
|--------------------------------------------------------------------------|---------|
| General experimental details                                             | S2      |
| Synthesis of (4-Nitrophenyl)dithioacetals                                | S3-S8   |
| Synthesis of (2-nitroaryl)dithioacetals                                  | S9-S10  |
| Synthesis of unsymmetrical sulfides                                      | S11-S12 |
| Synthesis of dithio- and diselenoacetals                                 | S12-S13 |
| Synthesis of 4-Nitrobenzaldehyde                                         | S14     |
| Synthesis of 7-(bis(phenylthio)methyl)-1 <i>H</i> -indole                | S15     |
| Synthesis of 1,2-bis(4-nitrophenyl)ethan-1-one                           | S16     |
| <sup>1</sup> H NMR, <sup>13</sup> C NMR spectra of synthesized compounds | S17-S49 |
| Crystallographic data for compounds <b>6</b> , <b>14</b> and <b>29</b>   | S50-S64 |
| References                                                               | S65     |

## General Experimental Details

All reactions were carried out in oven-dried glassware with magnetic stirring. Nitrotoluenes used in this study were purchased from commercial suppliers and used without further purification. Various diphenyl disulfides used were prepared from corresponding thiols. Solvents screened in this report were used as purchased from suppliers. Silica gel (230-400 mesh size) was used for column chromatography. TLC analysis of reaction mixtures was performed using silica gel plates. All NMR experiments were carried out on Bruker 400/500 MHz spectrometers in DMSO-*d*<sub>6</sub> or CDCl<sub>3</sub> and NMR chemical shifts are reported in ppm referenced to the solvent peaks of CDCl<sub>3</sub> (7.26 ppm for <sup>1</sup>H and 77.16 (± 0.06) ppm for <sup>13</sup>C, respectively) or DMSO-*d*<sub>6</sub> (3.31 ppm for H<sub>2</sub>O, 2.47 ppm for <sup>1</sup>H and 39.50 ppm for <sup>13</sup>C, respectively). The <sup>77</sup>Se NMR spectra were obtained at 76.31 MHz in CDCl<sub>3</sub> or DMSO-*d*<sub>6</sub>. Chemical shifts are reported relative to dimethyl selenide (<sup>77</sup>Se) (0 ppm). High resolution mass spectra (HRMS), electrospray mass spectra (ESMS), and low resolution mass spectra (LRMS) are reported for ions of <sup>80</sup>Se. High Resolution mass analysis is performed on quadrupole-time of flight (Q-TOF) Bruker MicroTOF-Q II mass spectrometer equipped with an ESI source (-ve/+ve) and APCI (-ve/+ve). Single crystal X-ray data for compounds **6** and **14** were collected on Bruker D8 VENTURE diffractometer equipped with CMOS Photon 100 detector and Mo-K $\alpha$  radiation ( $\lambda = 0.71073 \text{ \AA}$ ) was used.

### Scheme S1 General Procedure for Dithiolation of nitrotoluenes

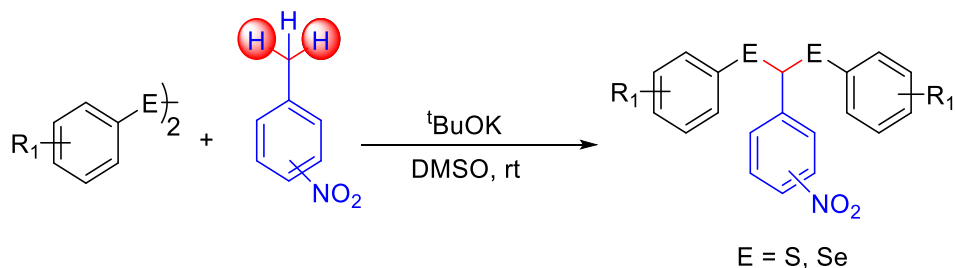

To a single neck flask, KO<sup>t</sup>Bu (112 mg, 1 mmol) was added in one portion to the solution of the diphenyl disulfide (109 mg, 0.5 mmol) and 4-nitrotoluene (137 mg, 1 mmol) in DMSO (2 mL) at room temperature. The resulted reaction mixture was stirred at room temperature for 6 hours. Next, saturated aqueous NaCl solution (15 mL) was added and the resulting mixture was extracted with ethyl acetate (3×20 mL). The organic layers were combined, dried over anhydrous Na<sub>2</sub>SO<sub>4</sub>, filtered and concentrated in *vacuo*. The crude product was purified by column chromatography by using dichloromethane/hexane (10/90). The desired compound **1** was obtained in yield (106 mg, 60%).

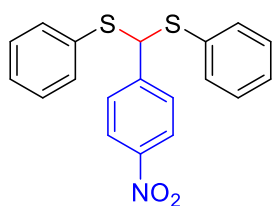

**((4-nitrophenyl)methylene)bis(phenylsulfane) (1)**. Light yellow liquid, Yield 106 mg (60%); <sup>1</sup>H NMR (400 MHz, CDCl<sub>3</sub>) δ 8.08 (d, *J* = 8.73 Hz, 2H), 7.43 (d, *J* = 8.73 Hz, 2H), 7.34-7.32 (m, 4H), 7.26-7.24 (m, 6H), 5.42 (s, 1H). <sup>13</sup>C NMR (100 MHz, CDCl<sub>3</sub>) δ 147.3, 147.1, 133.2, 133.1, 129.1, 128.8, 128.6, 123.7, 59.8. HRMS-ES<sup>-</sup> *m/z*: 352.0460 (calculated for C<sub>19</sub>H<sub>15</sub>NO<sub>2</sub>S<sub>2</sub> - H<sup>+</sup>: 352.0483).

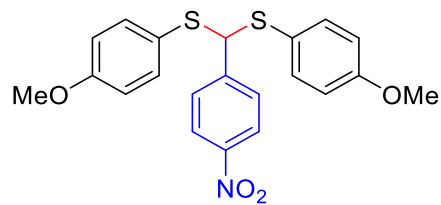

**((4-nitrophenyl)methylene)bis((4-methoxyphenyl)sulfane) (2).** Colourless liquid, Yield 126 mg (61%);  $^1\text{H}$  NMR (500 MHz,  $\text{CDCl}_3$ )  $\delta$  8.10-8.08 (m, 2H), 7.38-7.36 (m, 2H), 7.30-7.27 (m, 4H), 6.82-6.79 (m, 4H), 5.21 (s, 1H), 3.80 (s, 6H).  $^{13}\text{C}$  NMR (125 MHz,  $\text{CDCl}_3$ )  $\delta$  160.4, 147.7, 147.2, 136.3, 128.8, 123.5, 123.4, 114.6, 61.8, 55.3. HRMS-APCI  $m/z$ : 412.0672 (calculated for  $\text{C}_{21}\text{H}_{19}\text{NO}_4\text{S}_2 - \text{H}^+$ : 412.0676).

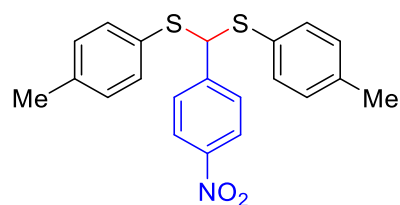

**((4-nitrophenyl)methylene)bis(p-tolylsulfane) (3).** Light yellow solid, Yield 138 mg (72%);  $^1\text{H}$  NMR (400 MHz,  $\text{CDCl}_3$ )  $\delta$  8.07 (d,  $J = 8.76$  Hz, 2H), 7.41 (d,  $J = 8.76$  Hz, 2H), 7.23 (d,  $J = 8.03$  Hz, 4H), 7.06 (d,  $J = 8.03$  Hz, 4H), 5.34 (s, 1H), 2.31 (s, 6H).  $^{13}\text{C}$  NMR (100 MHz,  $\text{CDCl}_3$ )  $\delta$  147.5, 147.2, 138.9, 133.7, 129.9, 129.5, 128.8, 123.6, 60.5, 21.2. HRMS-ES $^+$   $m/z$ : 404.0747 (calculated for  $\text{C}_{21}\text{H}_{19}\text{NO}_2\text{S}_2 + \text{Na}^+$ : 404.0749).

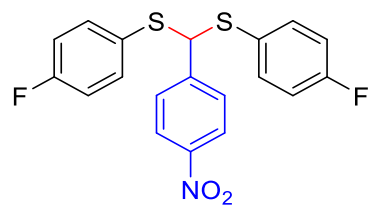

**((4-nitrophenyl)methylene)bis((4-fluorophenyl)sulfane) (4).** Light yellow liquid, Yield 133 mg (68%);  $^1\text{H}$  NMR (400 MHz,  $\text{CDCl}_3$ )  $\delta$  8.08 (d,  $J = 8.75$  Hz, 2H), 7.37 (d,  $J = 8.75$  Hz, 2H),

7.32-7.29 (m, 4H), 6.97-6.92 (m, 4H), 5.26 (s, 1H).  $^{13}\text{C}$  NMR (100 MHz,  $\text{CDCl}_3$ )  $\delta$  163.2 (d,  $^1J_{\text{C-F}} = 250.2$  Hz), 147.4, 146.7, 136.3 (d,  $^3J_{\text{C-F}} = 8.50$  Hz), 128.7, 127.9 (d,  $^4J_{\text{C-F}} = 3.45$  Hz), 123.7, 116.3 (d,  $^2J_{\text{C-F}} = 22.0$  Hz), 61.2. HRMS-ES $^-$   $m/z$ : 388.0301 (calculated for  $\text{C}_{19}\text{H}_{13}\text{F}_2\text{NO}_2\text{S}_2 - \text{H}^+$ : 388.0272).

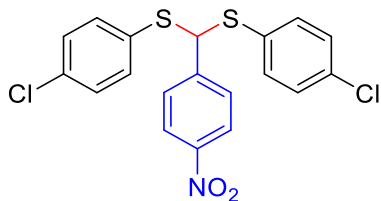

**((4-nitrophenyl)methylene)bis((4-chlorophenyl)sulfane) (5).** Light yellow solid, Yield 112 mg (53%);  $^1\text{H}$  NMR (400 MHz,  $\text{CDCl}_3$ )  $\delta$  8.11 (d,  $J = 8.71$  Hz, 2H), 7.42 (d,  $J = 8.71$  Hz, 2H), 7.26-7.21 (m, 8H), 5.33 (s, 1H).  $^{13}\text{C}$  NMR (100 MHz,  $\text{CDCl}_3$ )  $\delta$  147.5, 146.3, 135.2, 134.8, 131.2, 129.4, 128.7, 123.8, 60.2. HRMS-APCI $^-$   $m/z$ : 419.9657 (calculated for  $\text{C}_{19}\text{H}_{13}\text{Cl}_2\text{NO}_2\text{S}_2 - \text{H}^+$ : 419.9681).

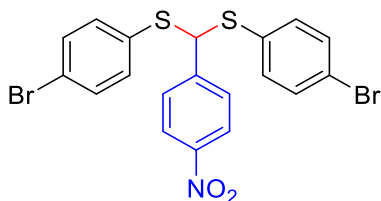

**((4-nitrophenyl)methylene)bis((4-bromophenyl)sulfane) (6).** Light yellow needles, mp 105  $^\circ\text{C}$ , Yield 115 mg (45%);  $^1\text{H}$  NMR (400 MHz,  $\text{CDCl}_3$ )  $\delta$  8.11 (d,  $J = 8.74$  Hz, 2H), 7.43 (d,  $J = 8.74$  Hz, 2H), 7.38 (d,  $J = 8.51$  Hz, 4H), 7.17 (d,  $J = 8.51$  Hz, 4H), 5.34 (s, 1H).  $^{13}\text{C}$  NMR (100 MHz,  $\text{CDCl}_3$ )  $\delta$  147.5, 146.2, 134.8, 132.3, 131.8, 128.7, 123.9, 123.3, 59.9. HRMS-APCI $^-$   $m/z$ : 507.8671 (calculated for  $\text{C}_{19}\text{H}_{13}\text{Br}_2\text{NO}_2\text{S}_2 - \text{H}^+$ : 507.8687).

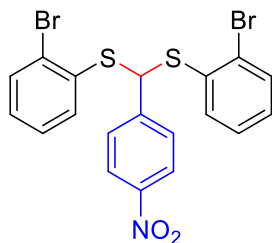

**((4-nitrophenyl)methylene)bis((2-bromophenyl)sulfane) (7).** Yellow semi-solid, Yield 153 mg (60%);  $^1\text{H}$  NMR (400 MHz,  $\text{CDCl}_3$ )  $\delta$  8.10 (d,  $J = 8.74$  Hz, 2H), 7.60 (d,  $J = 8.74$  Hz, 2H), 7.55 (dd,  $J = 7.87$  Hz,  $J = 1.24$  Hz, 2H), 7.44 (dd,  $J = 7.70$  Hz,  $J = 1.54$  Hz, 2H), 7.18 (dd,  $J = 7.50$  Hz,  $J = 1.24$  Hz, 2H), 7.11 (dd,  $J = 7.60$  Hz,  $J = 1.54$  Hz, 2H), 5.78 (s, 1H).  $^{13}\text{C}$  NMR (100 MHz,  $\text{CDCl}_3$ )  $\delta$  147.6, 145.8, 134.8, 134.1, 133.4, 129.9, 129.0, 128.0, 127.8, 123.9, 56.9. HRMS-ES<sup>+</sup>  $m/z$ : 531.8643 (calculated for  $\text{C}_{19}\text{H}_{13}\text{Br}_2\text{S}_2\text{NO}_2 + \text{Na}^+$ : 531.8647).

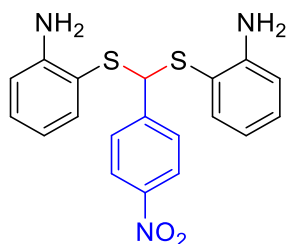

**2,2'-(((4-nitrophenyl)methylene)bis(sulfanediy))dianiline (8).** Dark brown viscous liquid, Yield 88 mg (46%);  $^1\text{H}$  NMR (400 MHz,  $\text{CDCl}_3$ )  $\delta$  8.08 (d,  $J = 8.73$  Hz, 2H), 7.41 (d,  $J = 8.73$  Hz, 2H), 7.16-7.10 (m, 4H), 6.67 (d,  $J = 8.03$  Hz, 2H), 6.57 (d,  $J = 7.50$  Hz, 2H), 5.08 (s, 1H), 4.21 (bs, 4H).  $^{13}\text{C}$  NMR (100 MHz,  $\text{CDCl}_3$ )  $\delta$  149.0, 148.0, 147.2, 137.4, 131.4, 128.5, 123.6, 118.4, 115.4, 115.2, 57.8. HRMS-APCI  $m/z$ : 382.0658 (calculated for  $\text{C}_{19}\text{H}_{17}\text{N}_3\text{O}_2\text{S}_2 - \text{H}^+$ : 382.0678)

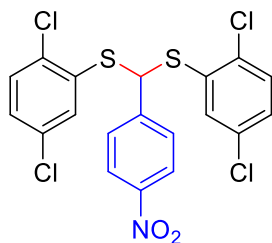

**((4-nitrophenyl)methylene)bis((2,5-dichlorophenyl)sulfane) (9).** Light grey semi-solid, Yield 125 mg (51%);  $^1\text{H}$  NMR (400 MHz,  $\text{CDCl}_3$ )  $\delta$  8.16 (d,  $J = 8.68$  Hz, 2H), 7.60 (d,  $J = 8.68$  Hz, 2H), 7.42 (d,  $J = 2.39$  Hz, 2H), 7.30 (d,  $J = 8.60$  Hz, 2H), 7.17 (dd,  $J = 8.60$  Hz,  $J = 2.39$  Hz, 2H), 5.77 (s, 1H).  $^{13}\text{C}$  NMR (100 MHz,  $\text{CDCl}_3$ )  $\delta$  147.9, 144.8, 135.1, 133.8, 133.6, 133.0, 130.9, 129.8, 128.8, 124.1, 56.2. HRMS-ES<sup>+</sup>  $m/z$ : 511.8875 (calculated for  $\text{C}_{19}\text{H}_{11}\text{Cl}_4\text{S}_2\text{NO}_2 + \text{Na}^+$ : 511.8878).

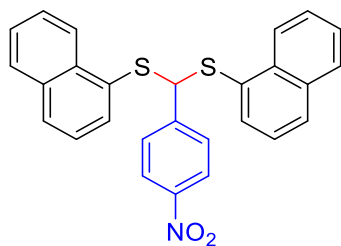

**((4-nitrophenyl)methylene)bis(naphthalen-1-ylsulfane) (10).** Yellow semi-solid, Yield 145 mg (64%) ;  $^1\text{H}$  NMR (400 MHz,  $\text{CDCl}_3$ )  $\delta$  8.11 (d,  $J = 8.50$  Hz, 2H), 8.01 (d,  $J = 8.70$  Hz, 2H), 7.83 (d,  $J = 8.20$  Hz, 4H), 7.61 (d,  $J = 7.10$  Hz, 2H), 7.47 (d,  $J = 7.50$  Hz, 2H), 7.37-7.30 (m, 6H), 5.35 (s, 1H).  $^{13}\text{C}$  NMR (100 MHz,  $\text{CDCl}_3$ )  $\delta$  147.6, 147.3, 134.7, 134.2, 130.3, 130.1, 128.8, 128.7, 127.1, 126.4, 125.5, 125.2, 123.6, 60.2. HRMS-ES<sup>+</sup>  $m/z$ : 476.0748 (calculated for  $\text{C}_{27}\text{H}_{19}\text{S}_2\text{NO}_2 + \text{Na}^+$ : 476.0749).

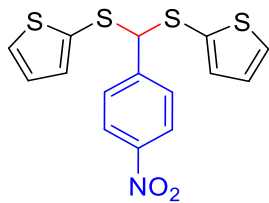

**2,2'-(((4-nitrophenyl)methylene)bis(sulfanediyl))dithiophene (11).** Cream viscous liquid, Yield 62 mg (34%);  $^1\text{H NMR}$  (400 MHz,  $\text{CDCl}_3$ )  $\delta$  8.09 (d,  $J = 8.77$  Hz, 2H), 7.39 (dd,  $J = 5.34$  Hz,  $J = 1.07$  Hz, 2H), 7.35 (d,  $J = 8.77$  Hz, 2H), 7.05 (dd,  $J = 3.58$  Hz,  $J = 1.08$  Hz, 2H), 6.95 (dd,  $J = 5.30$  Hz,  $J = 3.67$  Hz, 2H), 5.18 (s, 1H).  $^{13}\text{C NMR}$  (100 MHz,  $\text{CDCl}_3$ )  $\delta$  147.5, 146.1, 136.6, 131.8, 130.2, 128.8, 127.7, 123.6, 63.9. HRMS-APCI $^+$   $m/z$  363.9567 (calculated for  $\text{C}_{15}\text{H}_{11}\text{NO}_2\text{S}_4 - \text{H}^+$  : 363.9589).

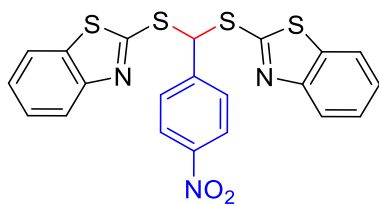

**2,2'-(((4-nitrophenyl)methylene)bis(sulfanediyl))bis(benzo[*d*]thiazole) (12).** Cream semi-solid, Yield 80 mg (34%);  $^1\text{H NMR}$  (400 MHz,  $\text{CDCl}_3$ )  $\delta$  8.20 (d,  $J = 8.76$  Hz, 2H), 7.90 (d,  $J = 8.76$  Hz, 2H), 7.87 (d,  $J = 8.23$  Hz, 2H), 7.74 (d,  $J = 7.76$  Hz, 2H), 7.42 (t,  $J = 7.15$  Hz, 2H), 7.32 (t,  $J = 7.15$  Hz, 2H), 7.19 (s, 1H).  $^{13}\text{C NMR}$  (100 MHz,  $\text{CDCl}_3$ )  $\delta$  162.1, 152.8, 145.1, 139.3, 135.7, 129.2, 126.4, 125.1, 124.0, 122.4, 121.2, 55.4. HRMS-ES $^+$   $m/z$  : 489.9784 (calculated for  $\text{C}_{21}\text{H}_{13}\text{N}_3\text{O}_2\text{S}_4 + \text{Na}^+$  : 489.9783).



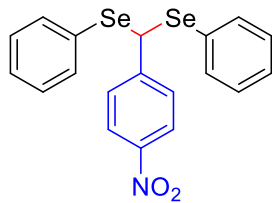

**((4-nitrophenyl)methylene)bis(phenylselane) (13).** Light yellow liquid, Yield 152 mg (68%);  $^1\text{H}$  NMR (400 MHz,  $\text{CDCl}_3$ )  $\delta$  8.00 (d,  $J = 8.75$  Hz, 2H), 7.42-7.40 (m, 4H), 7.33 (d,  $J = 8.75$  Hz, 2H), 7.27 (d,  $J = 7.30$  Hz, 2H), 7.23-7.19 (m, 4H), 5.49 (s, 1H).  $^{13}\text{C}$  NMR (100 MHz,  $\text{CDCl}_3$ )  $\delta$  149.0, 146.8, 135.0, 129.8, 129.2, 128.9, 128.8, 123.5, 41.8.  $^{77}\text{Se}$  NMR (76 MHz,  $\text{CDCl}_3$ )  $\delta$  481.5. HRMS-APCI $^+$   $m/z$  : 447.9361 (calculated for  $\text{C}_{19}\text{H}_{15}\text{NO}_2\text{Se}_2 - \text{H}^+$  : 447.9353).

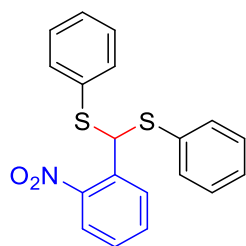

**((2-nitrophenyl)methylene)bis(phenylsulfane) (14).**<sup>1</sup> Brown crystals, mp 84 °C, Yield 80 mg (45%);  $^1\text{H}$  NMR (400 MHz,  $\text{CDCl}_3$ )  $\delta$  7.91 (d,  $J = 8.10$  Hz, 1H), 7.79 (d,  $J = 8.10$  Hz, 1H), 7.53 (d,  $J = 7.80$  Hz, 1H), 7.36-7.33 (m, 5H), 7.24-7.21 (m, 6H), 6.42 (s, 1H).  $^{13}\text{C}$  NMR (100 MHz,  $\text{CDCl}_3$ )  $\delta$  147.8, 134.6, 133.3, 133.2, 132.9, 130.7, 129.1, 128.6, 128.4, 124.5, 54.5. HRMS-ES $^+$   $m/z$  : 354.0617 (calculated for  $\text{C}_{19}\text{H}_{15}\text{NO}_2\text{S}_2 + \text{H}^+$  : 354.0613).

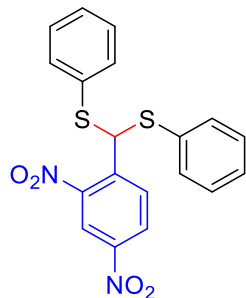

**((2,4-dinitrophenyl)methylene)bis(phenylsulfane) (15).** Dark brown viscous liquid, Yield 54 mg (27%);  $^1\text{H}$  NMR (400 MHz,  $\text{CDCl}_3$ )  $\delta$  8.60 (d,  $J = 2.26$  Hz, 1H), 8.30 (dd,  $J = 8.71$  Hz,  $J = 2.26$  Hz, 1H), 8.06 (d,  $J = 8.71$  Hz, 1H), 7.34-7.32 (m, 4H), 7.29-7.24 (m, 6H), 6.39 (s, 1H).  $^{13}\text{C}$  NMR (100 MHz,  $\text{CDCl}_3$ )  $\delta$  147.6, 146.8, 141.6, 133.4, 132.3, 132.1, 129.4, 129.1, 127.0, 120.0, 54.1. HRMS-ES $^-$   $m/z$ : 397.0311 (calculated for  $\text{C}_{19}\text{H}_{14}\text{N}_2\text{O}_4\text{S}_2 - \text{H}^+$ : 397.0339).

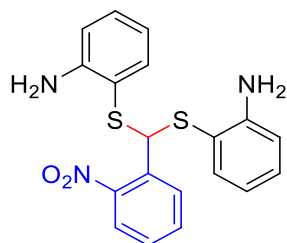

**2,2'-(((2-nitrophenyl)methylene)bis(sulfaneyl))dianiline (16):** Dark brown viscous liquid, Yield 71 mg (37%);  $^1\text{H}$  NMR (400 MHz,  $\text{CDCl}_3$ )  $\delta$  8.02 (d,  $J = 7.90$  Hz, 1H), 7.68 (d,  $J = 8.17$  Hz, 1H), 7.61 (t,  $J = 7.20$  Hz, 1H), 7.36 (t,  $J = 7.20$  Hz, 1H), 7.16 (dd,  $J = 7.70$  Hz,  $J = 1.33$  Hz, 2H), 7.10 (t,  $J = 7.70$  Hz, 2H), 6.64 (d,  $J = 8.08$  Hz, 2H), 6.55 (td,  $J = 7.51$  Hz,  $J = 1.12$  Hz, 2H), 5.87 (s, 1H), 4.20 (s, 4H).  $^{13}\text{C}$  NMR (100 MHz,  $\text{CDCl}_3$ )  $\delta$  149.1, 148.0, 137.3, 135.4, 133.0, 131.4, 131.2, 128.5, 123.9, 118.2, 115.1, 52.9. HRMS-ES $^+$   $m/z$ : 384.0863 (calculated for  $\text{C}_{19}\text{H}_{17}\text{N}_3\text{O}_2\text{S}_2 + \text{H}^+$ : 384.0835).

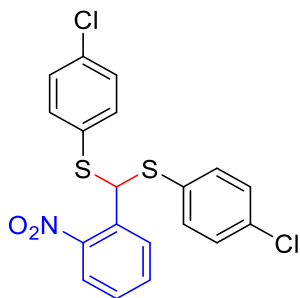

**((2-nitrophenyl)methylene)bis((4-chlorophenyl)sulfane) (17):** Brown viscous liquid, Yield 90 mg (43%);  $^1\text{H}$  NMR (400 MHz,  $\text{CDCl}_3$ )  $\delta$  7.84 (td,  $J = 8.05$  Hz,  $J = 0.95$  Hz, 2H), 7.55 (td,  $J = 7.65$  Hz,  $J = 0.95$  Hz, 1H), 7.39 (td,  $J = 7.65$  Hz,  $J = 1.18$  Hz, 1H), 7.27-7.19 (m, 8H), 6.34 (s, 1H).  $^{13}\text{C}$  NMR (100 MHz,  $\text{CDCl}_3$ )  $\delta$  147.8, 135.0, 134.4, 133.9, 133.3, 131.5, 130.5, 129.3, 129.0, 124.8, 55.0. HRMS-ES $^-$   $m/z$ : 419.9707 (calculated for  $\text{C}_{19}\text{H}_{13}\text{Cl}_2\text{NO}_2\text{S}_2 - \text{H}^+$ : 419.9681).

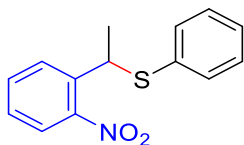

**(1-(2-nitrophenyl)ethyl)(phenyl)sulfane (18):** Colorless liquid, Yield 39 mg (30%);  $^1\text{H}$  NMR (400 MHz,  $\text{CDCl}_3$ )  $\delta$  7.75 (dd,  $J = 7.95$  Hz,  $J = 0.84$  Hz, 1H), 7.55 (dd,  $J = 8.13$  Hz,  $J = 0.97$  Hz, 1H), 7.53 (t,  $J = 7.71$  Hz, 1H), 7.31 (t,  $J = 7.71$  Hz, 1H), 7.24-7.17 (m, 5H), 5.05 (q,  $J = 6.91$  Hz, 1H), 1.67 (d,  $J = 6.91$  Hz, 3H).  $^{13}\text{C}$  NMR (100 MHz,  $\text{CDCl}_3$ )  $\delta$  149.1, 138.2, 133.8, 132.9, 132.6, 129.3, 128.9, 127.73, 127.69, 124.0, 42.1, 22.2. HRMS-ES $^+$   $m/z$ : 282.0557 (calculated for  $\text{C}_{14}\text{H}_{13}\text{NO}_2\text{S} + \text{Na}^+$ : 282.0559).

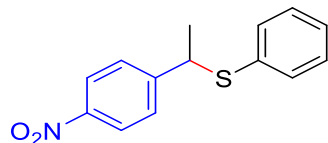

**(1-(4-nitrophenyl)ethyl)(phenyl)sulfane (19):**<sup>2</sup> Colorless oil, Yield 55 mg (43%); <sup>1</sup>H NMR (400 MHz, CDCl<sub>3</sub>) δ 8.09 (d, *J* = 8.79 Hz, 2H), 7.37 (d, *J* = 8.79 Hz, 2H), 7.22-7.17 (m, 5H), 4.35 (q, *J* = 7.06 Hz, 1H), 1.64 (d, *J* = 7.06 Hz, 3H). <sup>13</sup>C NMR (100 MHz, CDCl<sub>3</sub>) δ 151.1, 146.9, 133.6, 133.2, 128.9, 128.1, 127.9, 123.6, 47.7, 21.7.

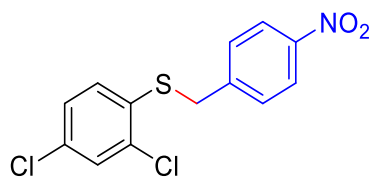

**(2,4-dichlorophenyl)(4-nitrobenzyl)sulfane (20):** Yellow liquid, Yield 75 mg (48%); <sup>1</sup>H NMR (400 MHz, CDCl<sub>3</sub>) δ 8.12 (d, *J* = 8.65 Hz, 2H), 7.42-7.40 (m, 3H), 7.11 (s, 2H), 4.15 (s, 2H). <sup>13</sup>C NMR (100 MHz, CDCl<sub>3</sub>) δ 147.3, 144.2, 136.4, 133.8, 132.5, 132.1, 129.9, 129.7, 127.5, 123.8, 37.5.

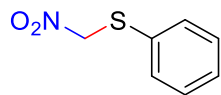

**(nitromethyl)(phenyl)sulfane (21):**<sup>3</sup> Light yellow oil, Yield 27 mg (32%); <sup>1</sup>H NMR (400 MHz, CDCl<sub>3</sub>) δ 7.51-7.48 (m, 2H), 7.37-7.35 (m, 3H), 5.44 (s, 2H). <sup>13</sup>C NMR (100 MHz, CDCl<sub>3</sub>) δ 132.2, 131.7, 129.6, 129.2, 79.5.

### General Procedure for Synthesis of thio- and selenoacetals 22-25.

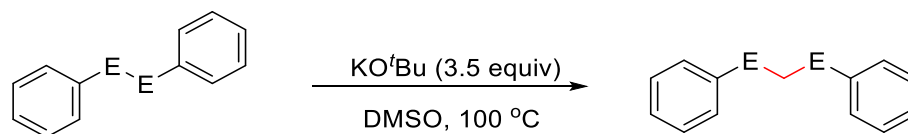

Diphenyl disulfide (110 mg, 0.5 mmol) was taken in DMSO in a 10 ml round bottom flask followed by addition of KO<sup>t</sup>Bu (197 mg, 1.75 mmol). The reaction mixture was placed in a pre-heated oil bath at 100 °C and heated for 24 h. Then reaction mixture was poured in brine and extracted with dichloromethane (3 x 5 mL), dried over sodium sulfate and evaporated over rotary evaporator. Purification by chromatography (dichloromethane/hexane: 3/97) resulted in the pure product **22**.

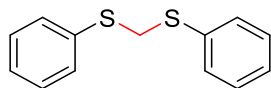

**bis(phenylthio)methane (22):**<sup>4</sup> Yield 29 mg (25%); <sup>1</sup>H NMR (400 MHz, CDCl<sub>3</sub>) δ 7.42-7.40 (m, 4H), 7.32-7.28 (m, 4H), 7.25-7.23 (m, 2H), 4.33 (s, 2H). <sup>13</sup>C NMR (100 MHz, CDCl<sub>3</sub>) δ 135.0, 130.7, 129.0, 127.2, 40.6. LRMS-GC *m/z* : 232.0 (calculated for C<sub>13</sub>H<sub>12</sub>S<sub>2</sub>: 232.0).

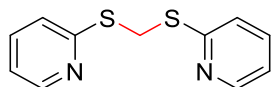

**bis(pyridin-2-ylthio)methane (23):**<sup>4</sup> Yield 27 mg (23%); <sup>1</sup>H NMR (400 MHz, CDCl<sub>3</sub>) δ 8.48 (d, *J* = 4.2 Hz, 2H), 7.47 (td, *J* = 7.9 Hz, *J* = 1.8 Hz, 2H), 7.17 (d, *J* = 8.1 Hz, 2H), 7.01 – 6.98 (m, 2H), 5.05 (s, 2H). <sup>13</sup>C NMR (100 MHz, CDCl<sub>3</sub>) δ 158.3, 149.5, 136.0, 122.5, 119.7, 30.7. LRMS-GC *m/z* : 234.0 (calculated for C<sub>11</sub>H<sub>10</sub>N<sub>2</sub>S<sub>2</sub>: 234.0).

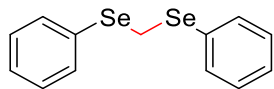

**bis(phenylselanyl)methane (24):**<sup>4</sup> Light Yellow liquid, Yield 106 mg (65%); <sup>1</sup>H NMR (400 MHz, CDCl<sub>3</sub>) δ 7.53-7.51 (m, 4H), 7.72-7.26 (m, 6H), 4.22 (s, 2H). <sup>13</sup>C NMR (100 MHz, CDCl<sub>3</sub>) δ 133.0, 130.8, 129.2, 127.6, 21.0. <sup>77</sup>Se NMR (76 MHz, CDCl<sub>3</sub>) δ 345.5. LRMS-GC *m/z* : 327.9 (calculated for C<sub>13</sub>H<sub>12</sub>Se<sub>2</sub>: 327.9).

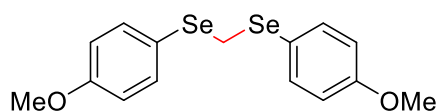

**bis((4-methoxyphenyl)selanyl)methane (25).** Orange semi-solid, Yield 116 mg (60%); <sup>1</sup>H NMR (400 MHz, CDCl<sub>3</sub>) δ 7.47 (d, *J* = 8.77 Hz, 4H), 6.80 (d, *J* = 8.77 Hz, 4H), 4.06 (s, 2H), 3.79 (s, 6H). <sup>13</sup>C NMR (100 MHz, CDCl<sub>3</sub>) δ 159.7, 135.9, 120.8, 114.8, 55.3, 23.7. <sup>77</sup>Se NMR (76 MHz, CDCl<sub>3</sub>) δ 336.5 HRMS-ES<sup>+</sup> *m/z* : 426.9110 (calculated for C<sub>15</sub>H<sub>16</sub>O<sub>2</sub>Se<sub>2</sub> + K<sup>+</sup> : 426.9115).

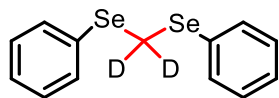

**bis(phenylselanyl)methane-*d*<sub>2</sub> (26):** Yield 50 mg (30%); <sup>1</sup>H NMR (400 MHz, CDCl<sub>3</sub>) δ 7.58-7.46 (m, 4H), 7.33-7.18 (m, 6H), 3.43 (bs, H<sub>2</sub>O), 2.47 (DMSO). HRMS-GC<sup>+</sup> *m/z* : 329.9387 (calculated for C<sub>13</sub>H<sub>10</sub>D<sub>2</sub>Se<sub>2</sub> : 329.9395).

## General Procedure for Synthesis of 4-Nitrobenzaldehyde<sup>5</sup>

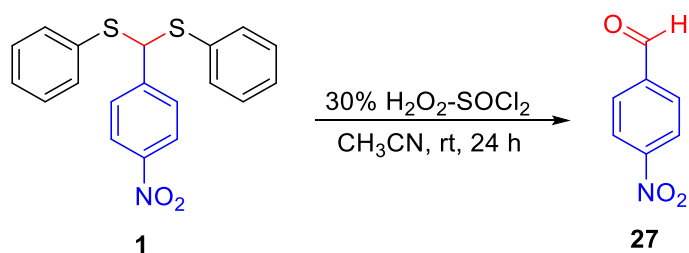

A mixture of dithioacetal **1** (90 mg, 0.25 mmol), H<sub>2</sub>O<sub>2</sub> (30%, 80 μl, 1 mmol) and SOCl<sub>2</sub> (36 μl, 0.5 mmol) was stirred in CH<sub>3</sub>CN at 25 °C for 24 h. The progress of the reaction was monitored by TLC. After completion, the reaction was quenched by the addition of H<sub>2</sub>O (10 mL) and the resulting mixture was extracted with EtOAc (4 x 3 mL). The combined organic phase was dried over anhydrous sodium sulfate, and evaporated. Chromatography on silica gel (DCM/Hexane: 50/50) gave a pure product **27** in 60% yield.

**4-Nitrobenzaldehyde (27):** Light yellow solid, Yield 38 mg (60%); <sup>1</sup>H NMR (400 MHz, CDCl<sub>3</sub>) δ 10.15 (s, 1H), 8.39 (d, *J* = 8.63 Hz, 2H), 8.06 (d, *J* = 8.63 Hz, 2H). <sup>13</sup>C NMR (100 MHz, CDCl<sub>3</sub>) δ 190.2, 151.2, 140.0, 130.5, 124.3.

## General Procedure for Synthesis of 7-(bis(phenylthio)methyl)-1*H*-indole<sup>6</sup>

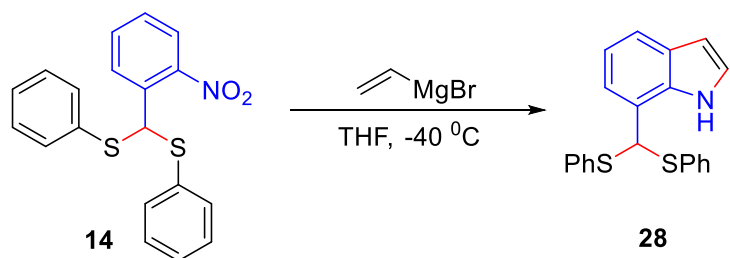

((2-nitrophenyl)methylene)bis(phenylsulfane) **14** (88 mg, 0.25 mmol) was dissolved in THF (3 mL) and the solution cooled to  $-40\text{ }^{\circ}\text{C}$ . Then vinylmagnesium bromide (0.75 mL, 1.0 M in THF, 3.0 equiv) was added dropwise over 15 min. After completion of the addition, the reaction mixture was stirred at  $-40\text{ }^{\circ}\text{C}$ . The progress of reaction was monitored by TLC. When all the starting material was consumed, the reaction mixture was quenched with saturated aqueous  $\text{NH}_4\text{Cl}$  solution (5 mL), extracted with ethyl acetate ( $3\times 10\text{ mL}$ ), the combined organic layers were washed with brine (10 mL) and dried over  $\text{Na}_2\text{SO}_4$ . The crude product was purified by column chromatography (hexane: ethyl acetate. 95:5). Yield 60 mg (70%).

**7-(bis(phenylthio)methyl)-1H-indole (28)**: Dark red semi-solid, Yield 60 mg (70%);  $^1\text{H}$  NMR (400 MHz,  $\text{CDCl}_3$ )  $\delta$  9.08 (brs, 1H), 7.55 (d,  $J = 7.64\text{ Hz}$ , 1H), 7.30-7.27 (m, 5H), 7.22-7.18 (m, 6H), 6.91-6.83 (m, 2H), 6.56 (t,  $J = 2.50\text{ Hz}$ , 1H), 5.67 (s, 1H).  $^{13}\text{C}$  NMR (125 MHz,  $\text{CDCl}_3$ )  $\delta$  134.0, 133.3, 132.8, 129.2, 128.9, 128.1, 124.3, 122.1, 121.3, 121.2, 119.2, 102.7, 59.9. HRMS-ES<sup>+</sup>  $m/z$  : 386.0434 (calculated for  $\text{C}_{21}\text{H}_{17}\text{NS}_2 + \text{K}^+$  : 386.0436).

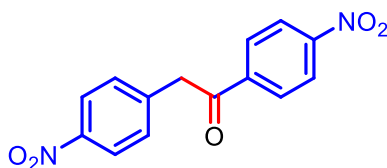

**1,2-bis(4-nitrophenyl)ethan-1-one (29)**: Light brown needles, mp  $107\text{ }^{\circ}\text{C}$ , Yield 57 mg (30%);  $^1\text{H}$  NMR (400 MHz,  $\text{CDCl}_3$ )  $\delta$  8.32 (d,  $J = 8.82\text{ Hz}$ , 2H), 8.19 (d,  $J = 8.71\text{ Hz}$ , 2H), 8.15 (d,  $J = 8.85\text{ Hz}$ , 2H), 7.42 (d,  $J = 8.71\text{ Hz}$ , 2H), 4.46 (s, 2H).  $^{13}\text{C}$  NMR (100 MHz,  $\text{CDCl}_3$ )  $\delta$  194.5, 150.6, 147.3, 140.7, 140.5, 130.7, 129.4, 124.1, 123.9, 45.4.



S1 <sup>1</sup>H & <sup>13</sup>C NMR of 1

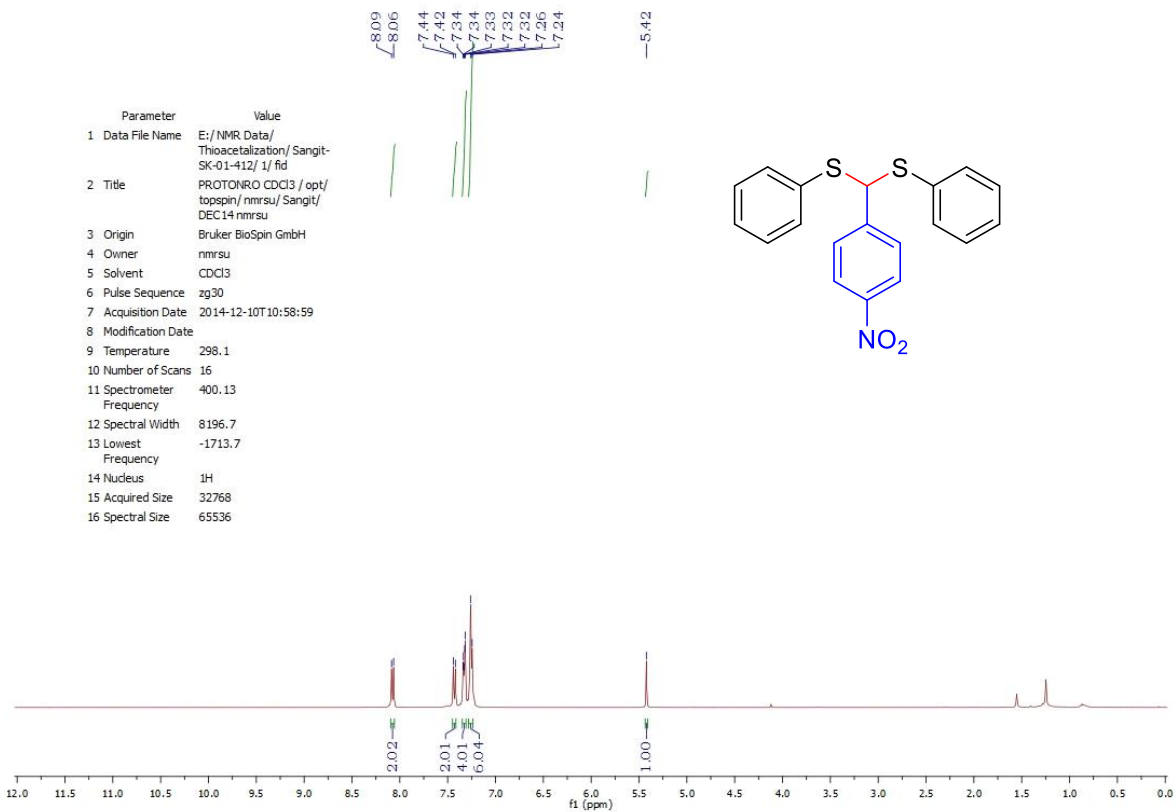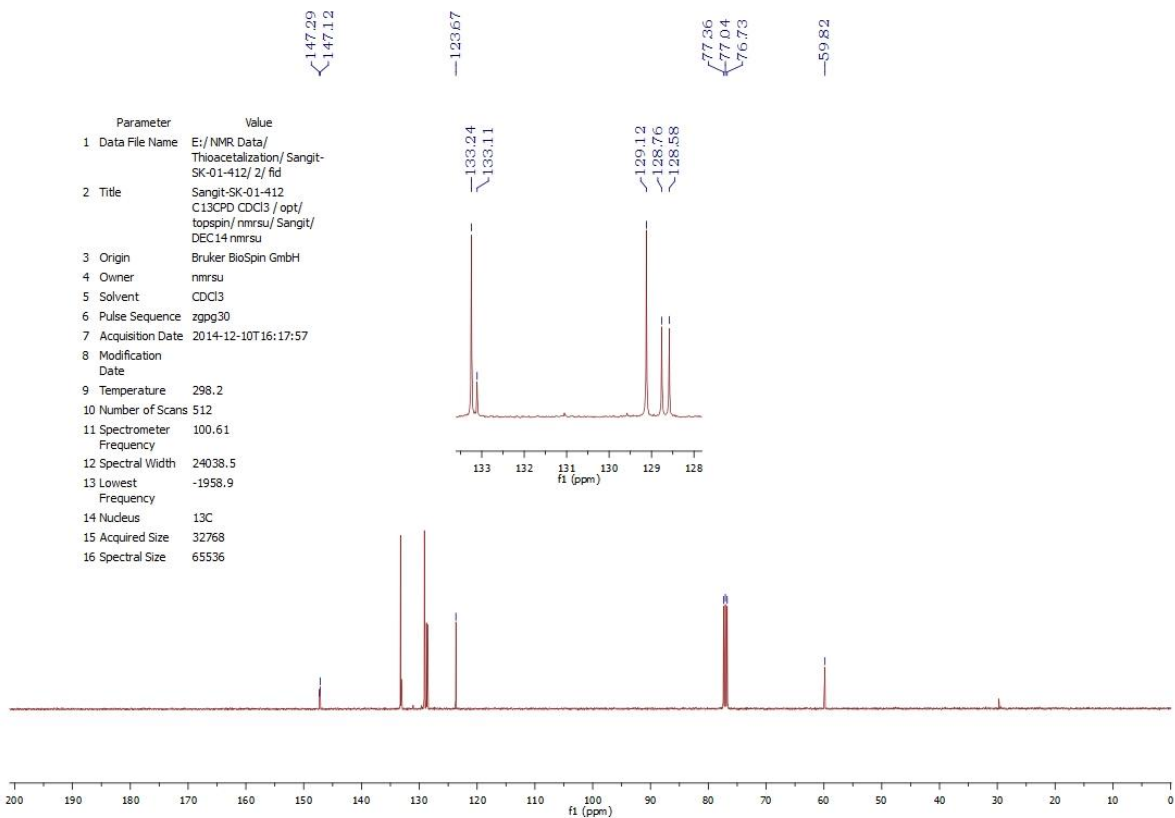

S2 <sup>1</sup>H & <sup>13</sup>C NMR of 2

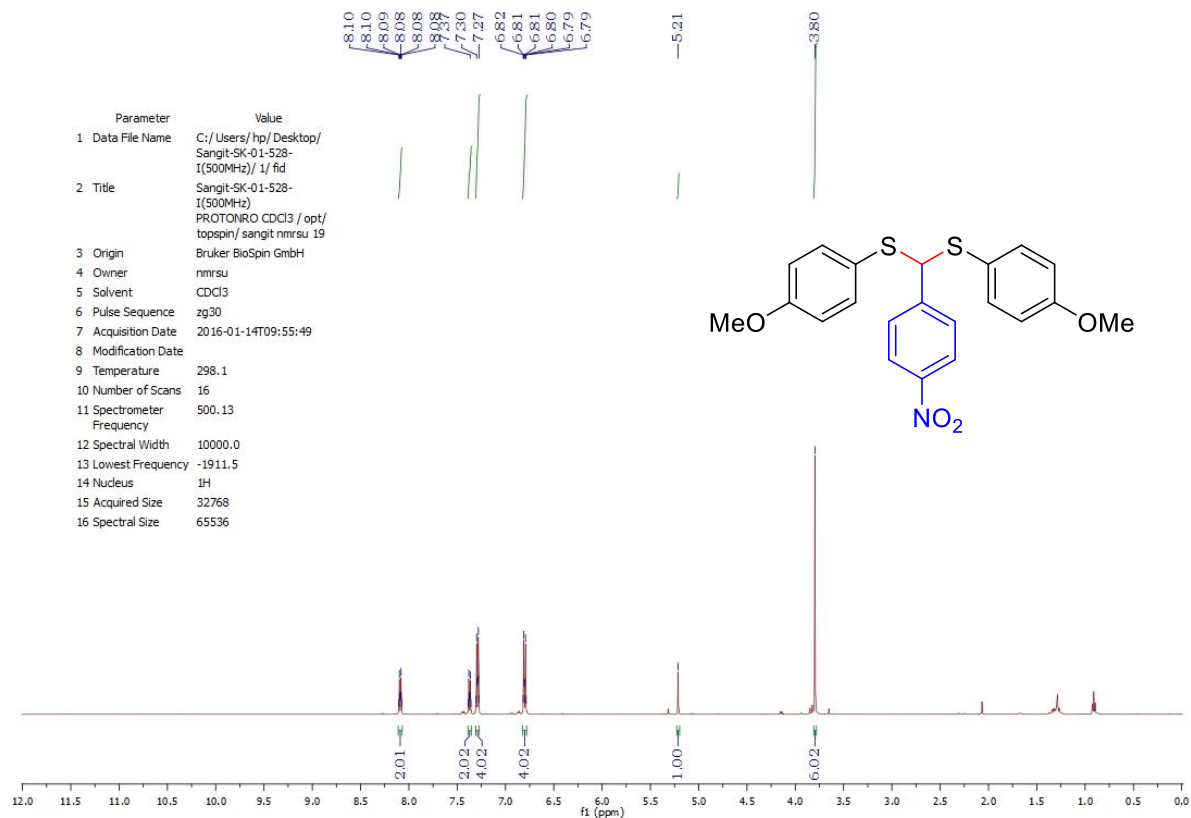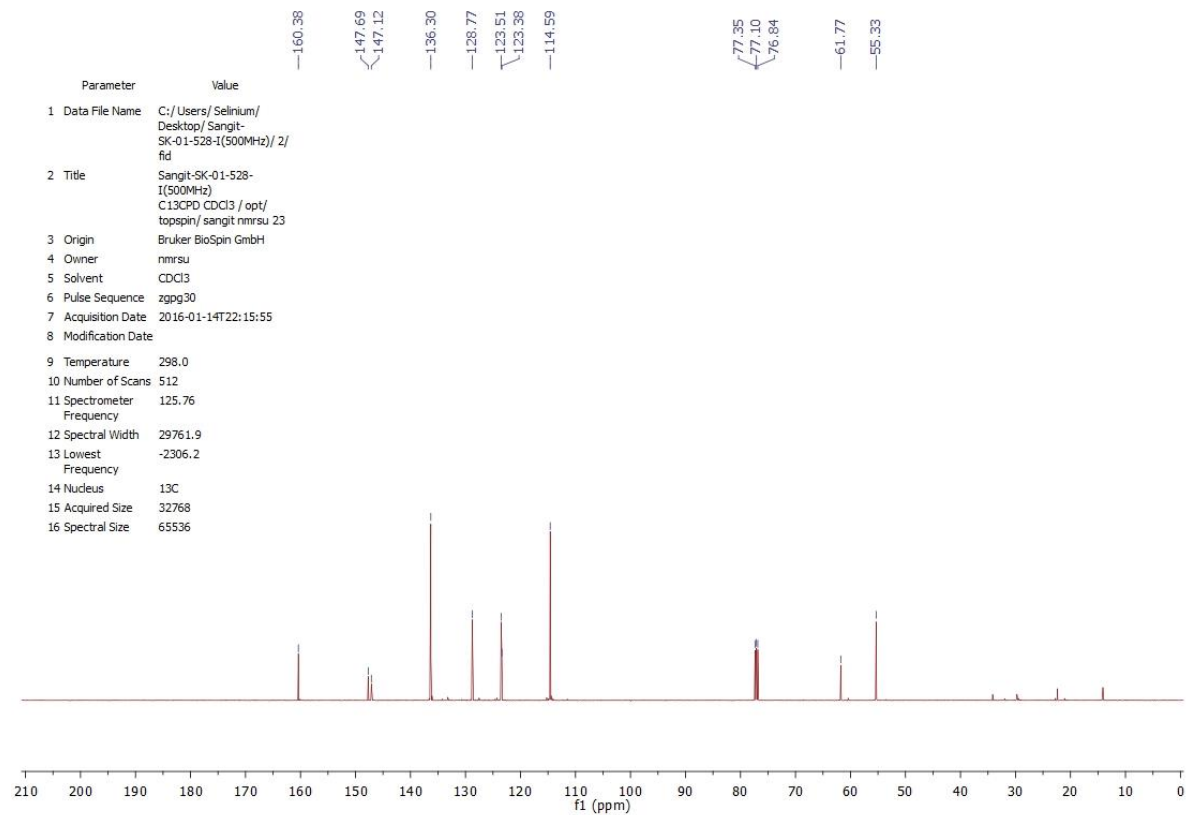

S3 <sup>1</sup>H & <sup>13</sup>C NMR of 3

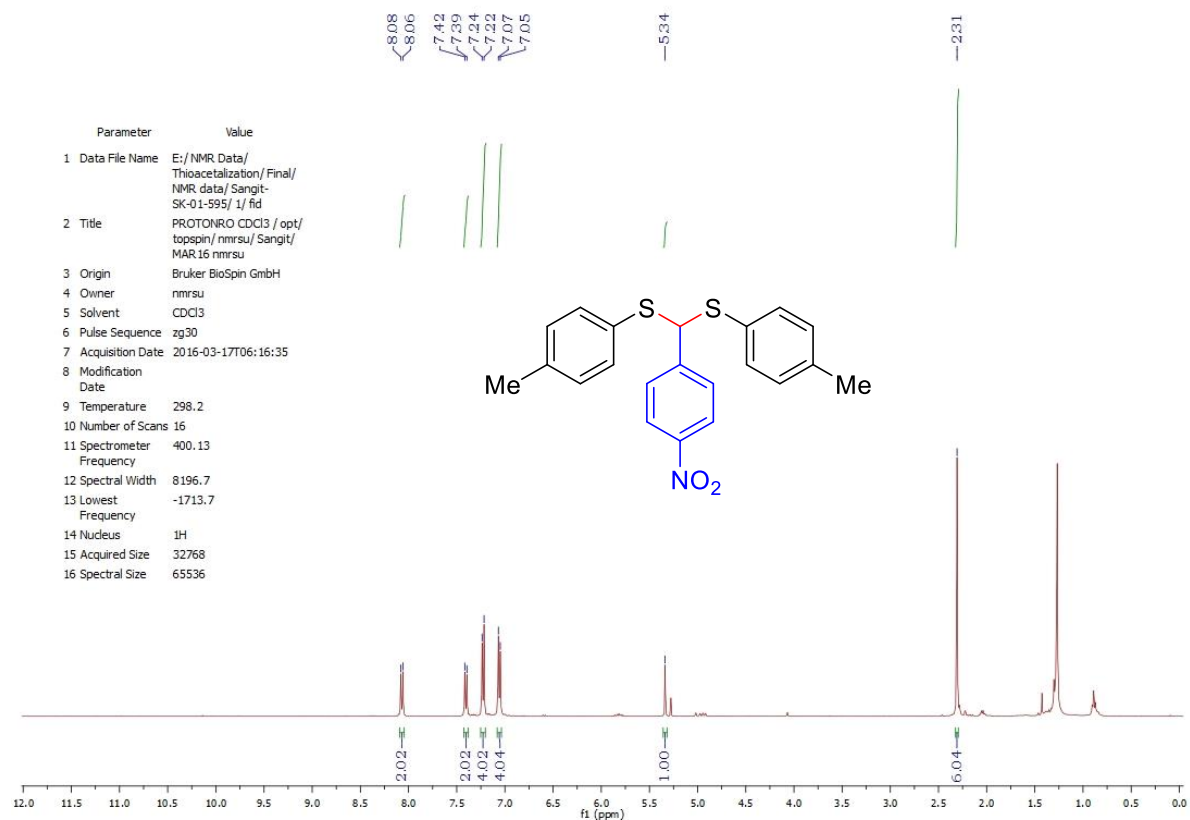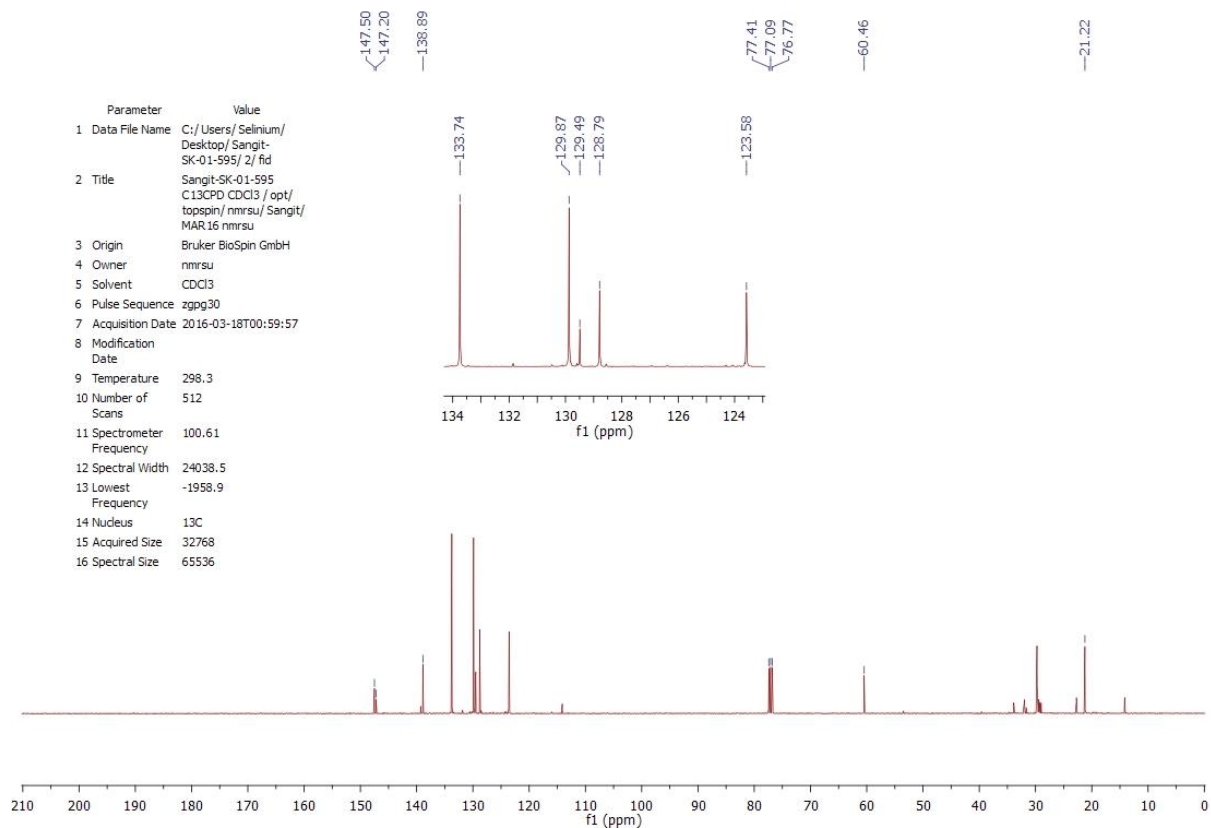

S4 <sup>1</sup>H & <sup>13</sup>C NMR of 4

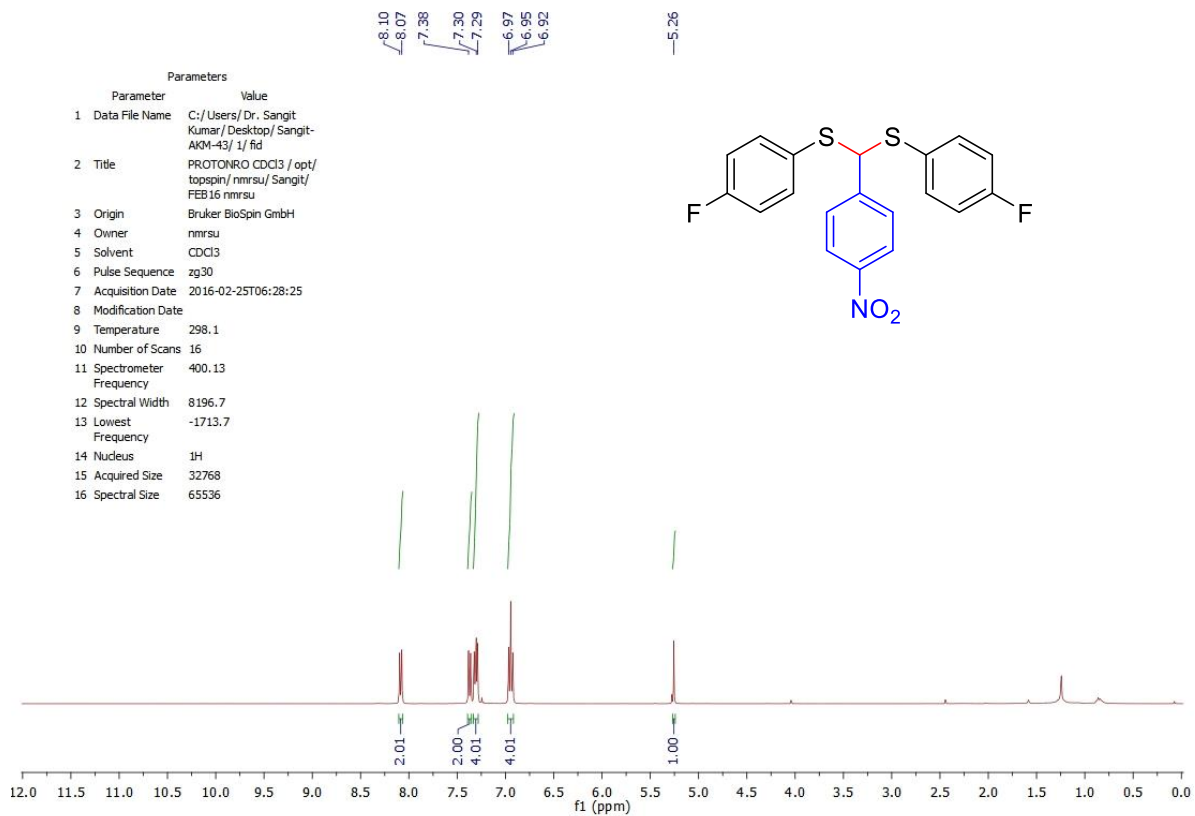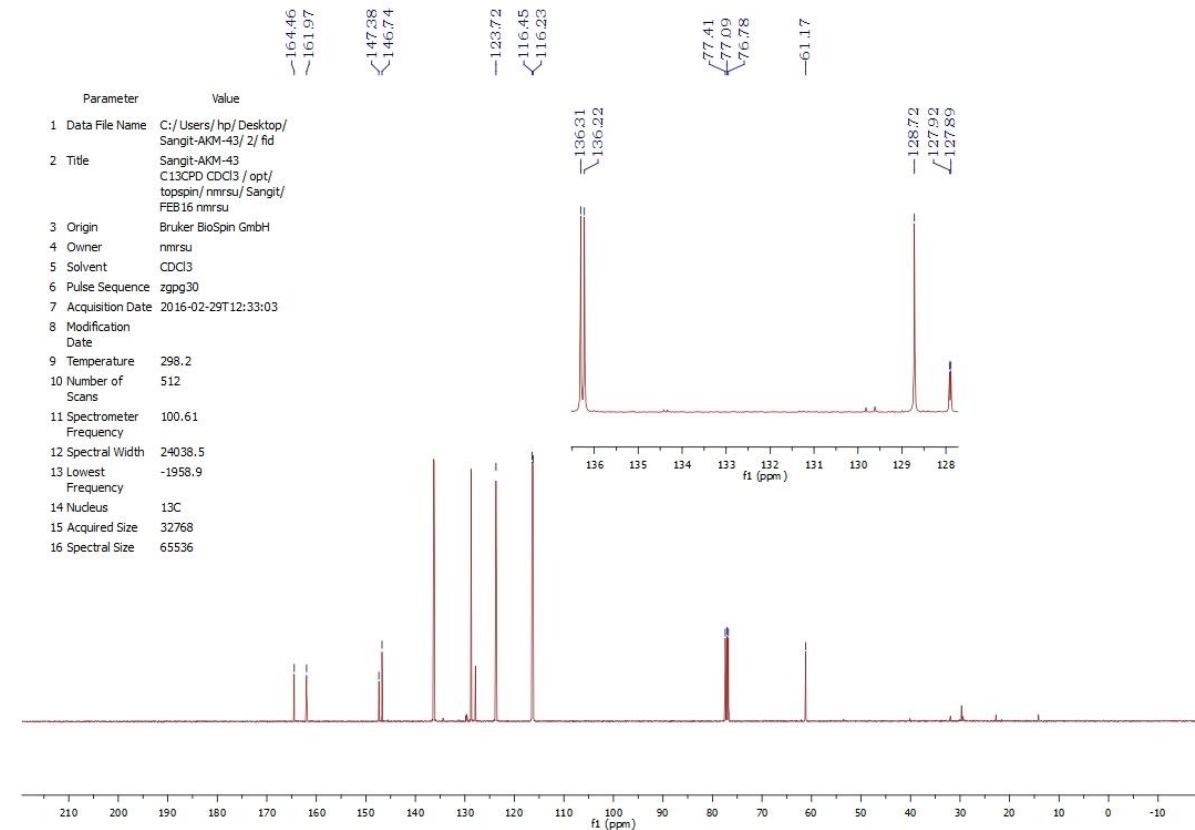

S5 <sup>1</sup>H & <sup>13</sup>C NMR of 5

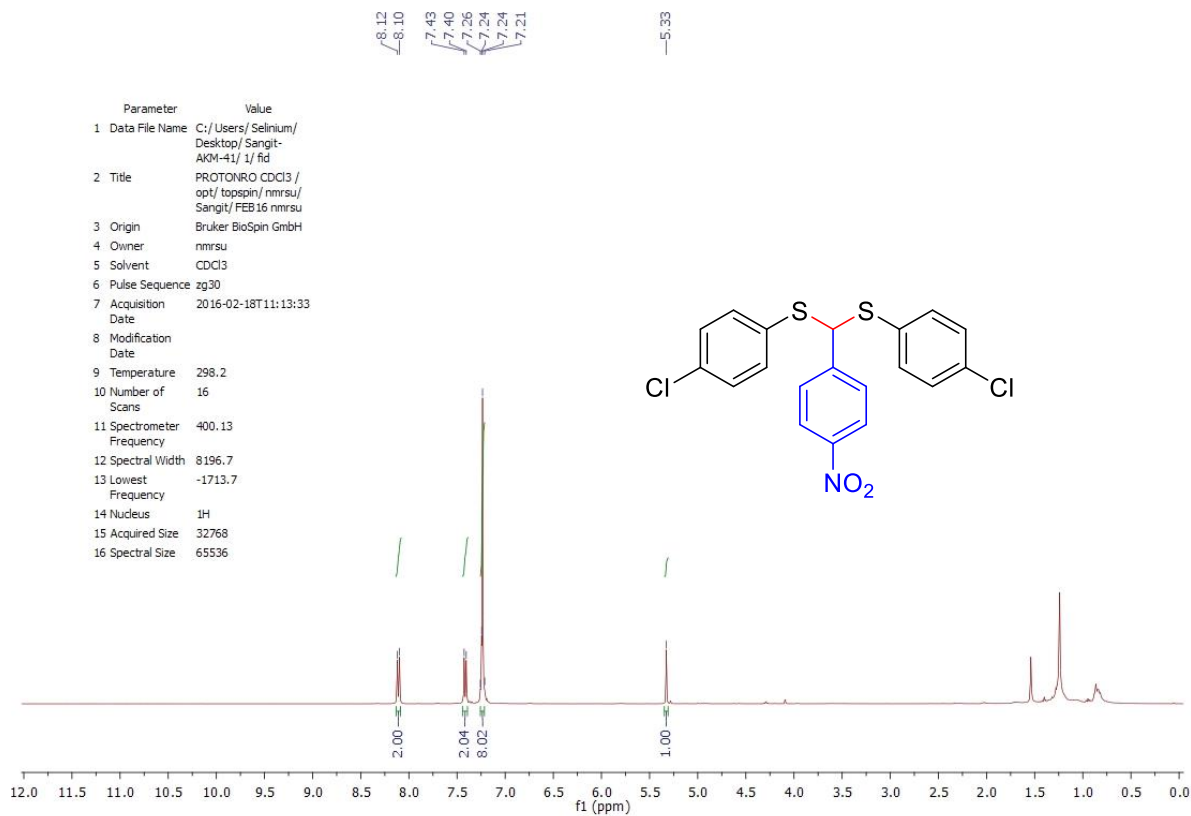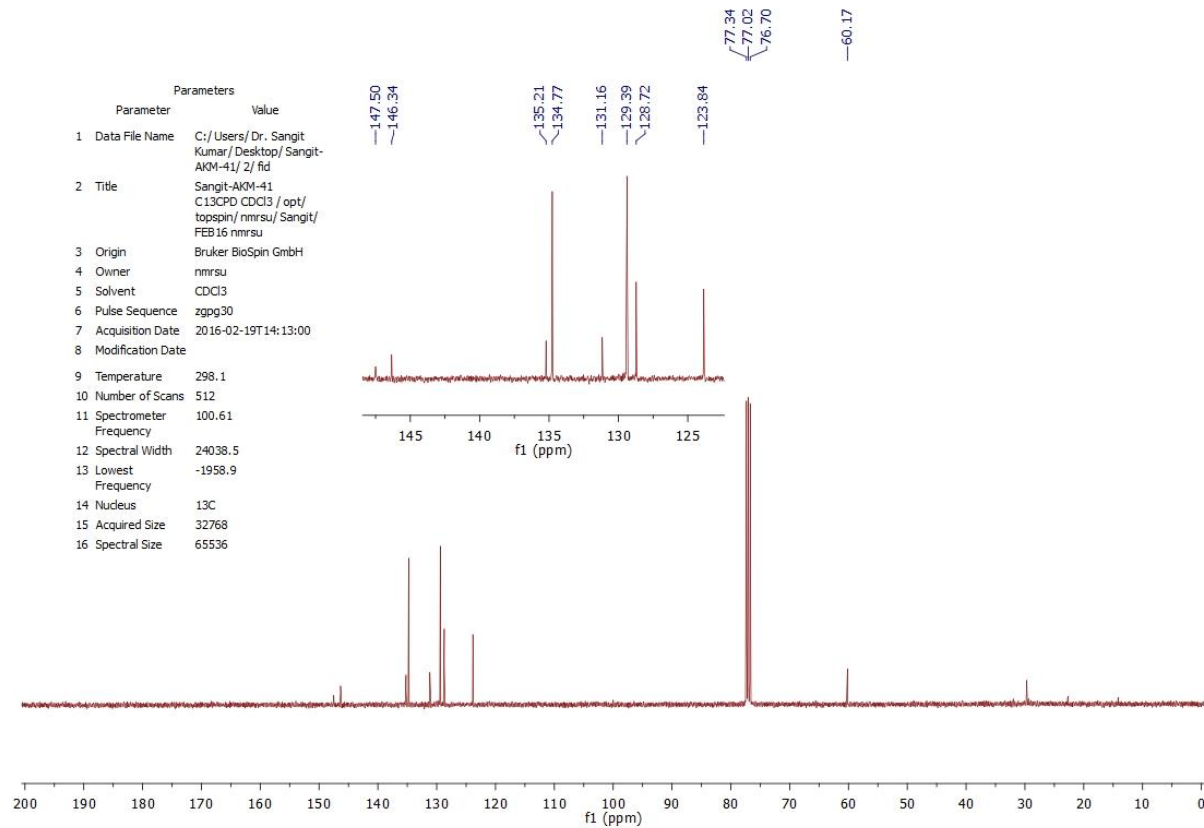

S6 <sup>1</sup>H & <sup>13</sup>C NMR of 6

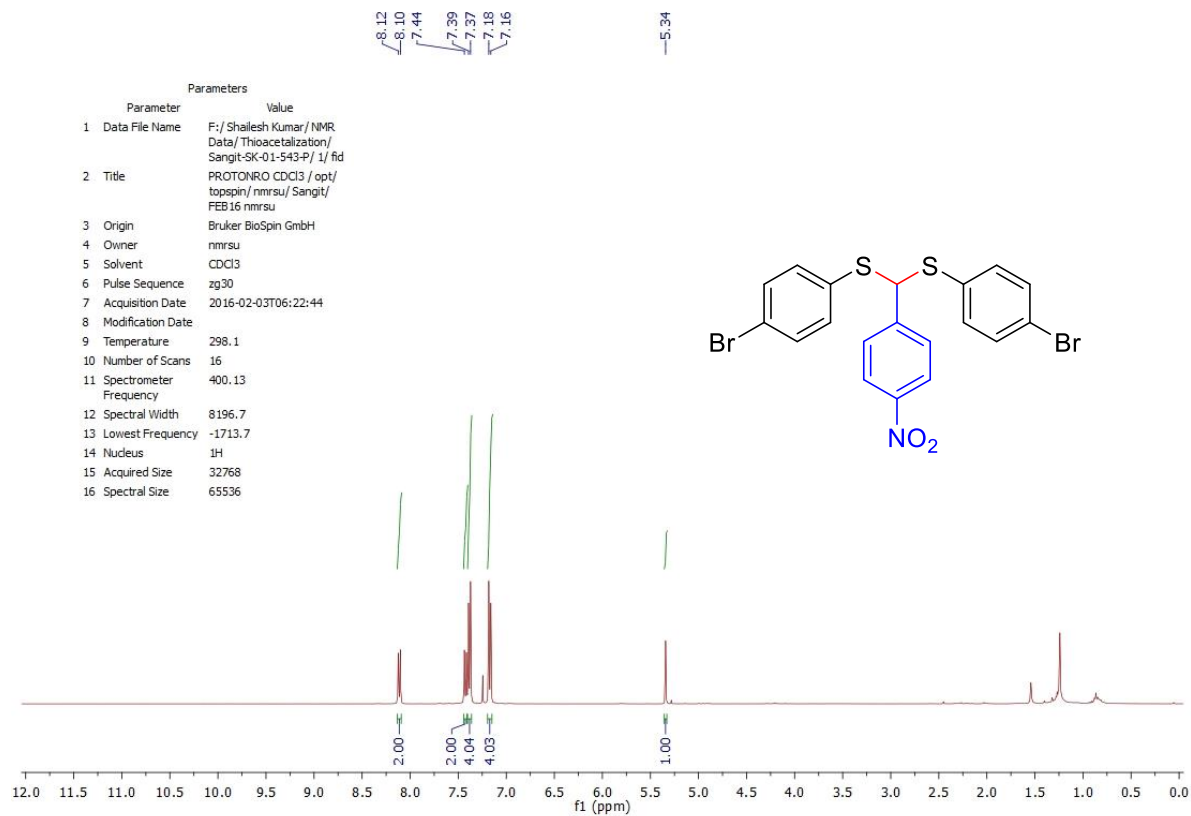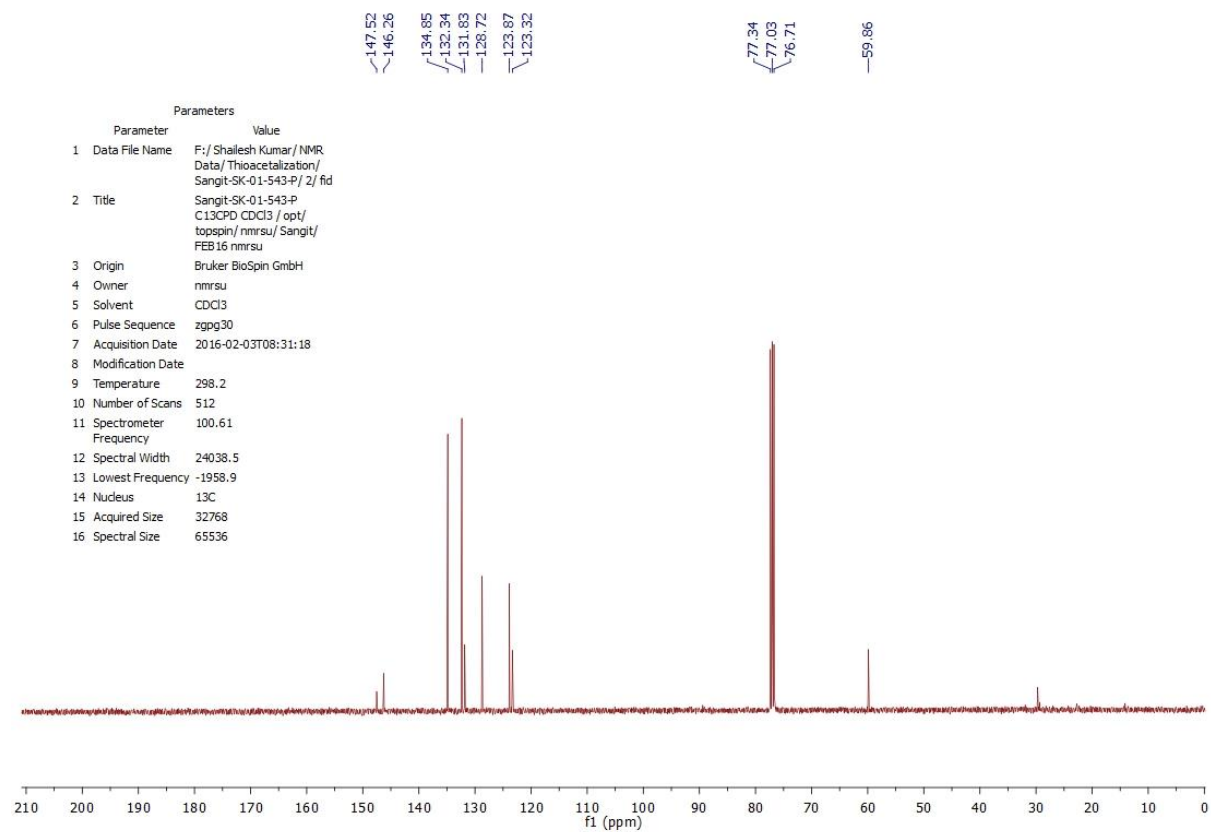

S7 <sup>1</sup>H & <sup>13</sup>C NMR of 7

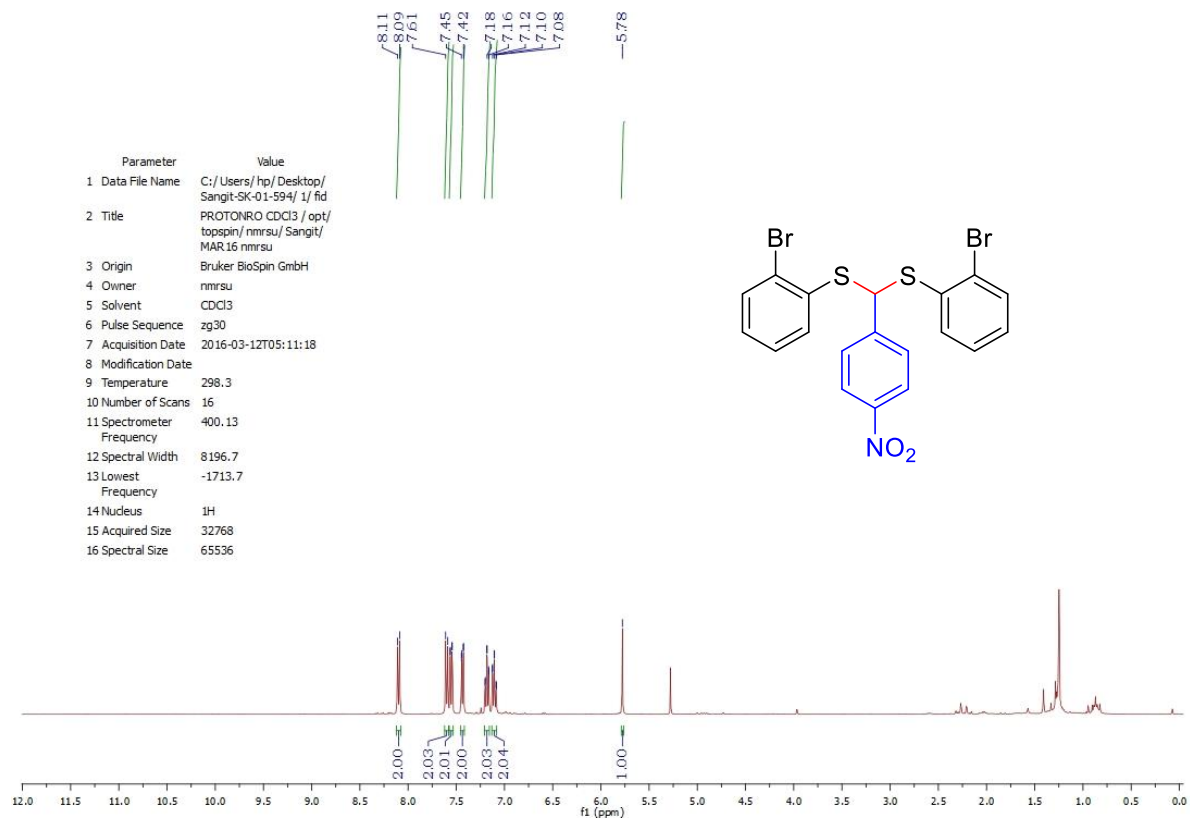

| Parameter           | Value                                                      |
|---------------------|------------------------------------------------------------|
| 1 Data File Name    | C:/Users/hp/Desktop/Sangit-SK-01-594/ 1/ fid               |
| 2 Title             | PROTONRO CDCl3 / opt/ topspin/ nmrsu/ Sangit/ MAR.16 nmrsu |
| 3 Origin            | Bruker BioSpin GmbH                                        |
| 4 Owner             | nmrsu                                                      |
| 5 Solvent           | CDCl3                                                      |
| 6 Pulse Sequence    | zg30                                                       |
| 7 Acquisition Date  | 2016-03-12T05:11:18                                        |
| 8 Modification Date |                                                            |
| 9 Temperature       | 298.3                                                      |
| 10 Number of Scans  | 16                                                         |
| 11 Spectrometer     | 400.13                                                     |
| Frequency           |                                                            |
| 12 Spectral Width   | 8196.7                                                     |
| 13 Lowest           | -1713.7                                                    |
| Frequency           |                                                            |
| 14 Nucleus          | <sup>1</sup> H                                             |
| 15 Acquired Size    | 32768                                                      |
| 16 Spectral Size    | 65536                                                      |

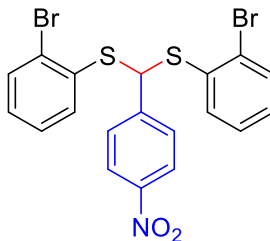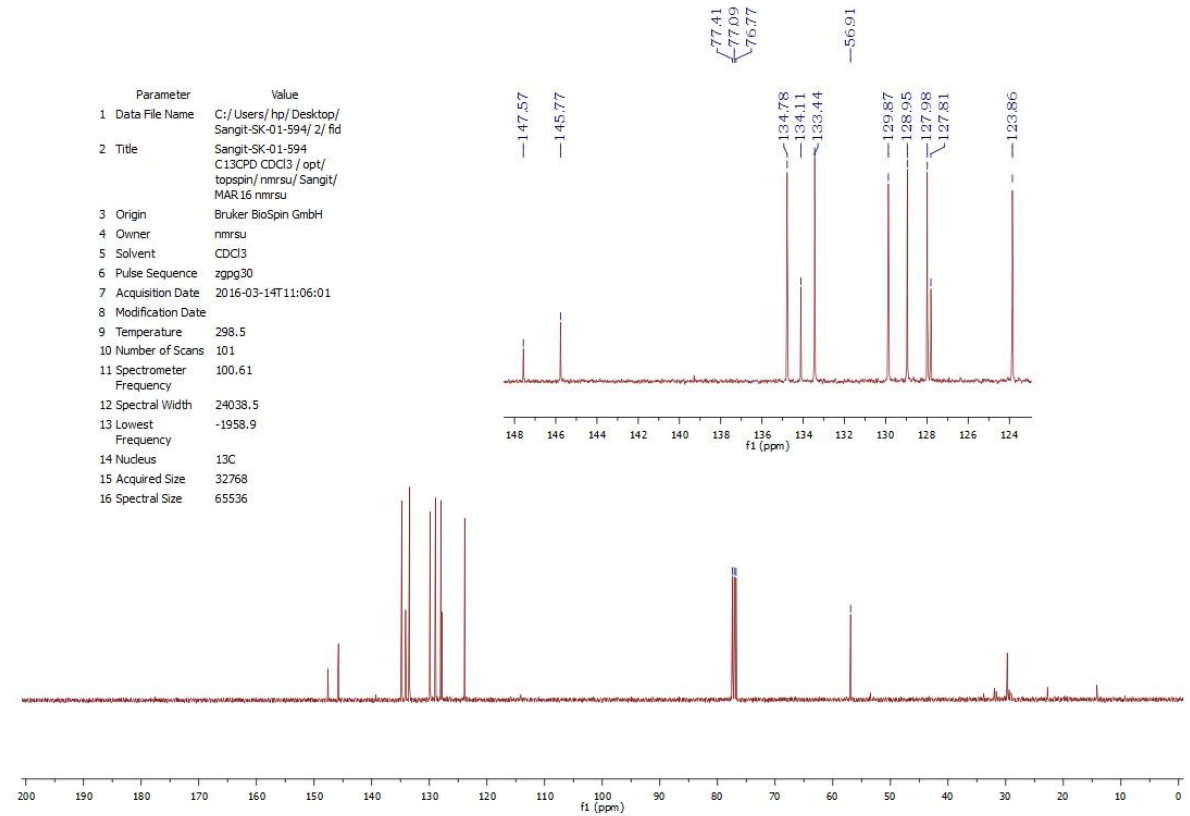

| Parameter           | Value                                                                        |
|---------------------|------------------------------------------------------------------------------|
| 1 Data File Name    | C:/Users/hp/Desktop/Sangit-SK-01-594/ 2/ fid                                 |
| 2 Title             | Sangit-SK-01-594<br>C13CPD CDCl3 / opt/ topspin/ nmrsu/ Sangit/ MAR.16 nmrsu |
| 3 Origin            | Bruker BioSpin GmbH                                                          |
| 4 Owner             | nmrsu                                                                        |
| 5 Solvent           | CDCl3                                                                        |
| 6 Pulse Sequence    | zgpg30                                                                       |
| 7 Acquisition Date  | 2016-03-14T11:06:01                                                          |
| 8 Modification Date |                                                                              |
| 9 Temperature       | 298.5                                                                        |
| 10 Number of Scans  | 101                                                                          |
| 11 Spectrometer     | 100.61                                                                       |
| Frequency           |                                                                              |
| 12 Spectral Width   | 24038.5                                                                      |
| 13 Lowest           | -1958.9                                                                      |
| Frequency           |                                                                              |
| 14 Nucleus          | <sup>13</sup> C                                                              |
| 15 Acquired Size    | 32768                                                                        |
| 16 Spectral Size    | 65536                                                                        |

# S8 <sup>1</sup>H & <sup>13</sup>C NMR of 8

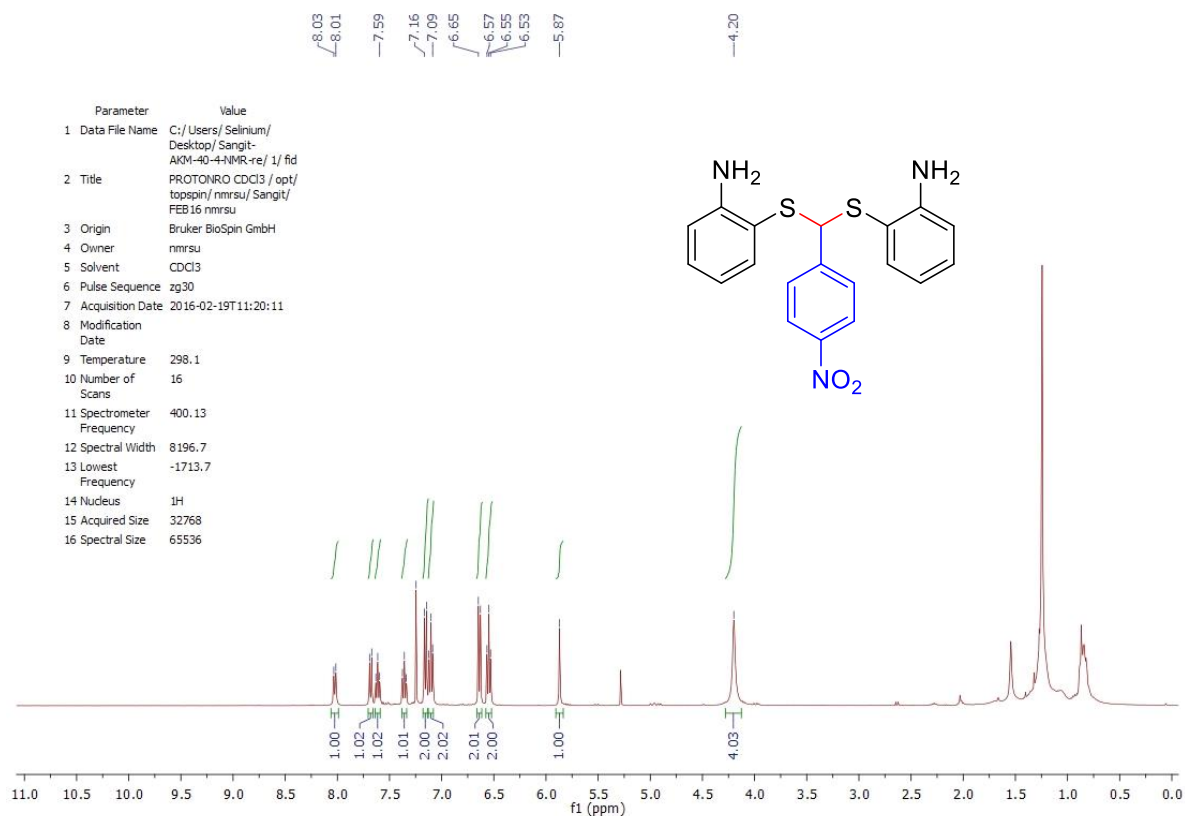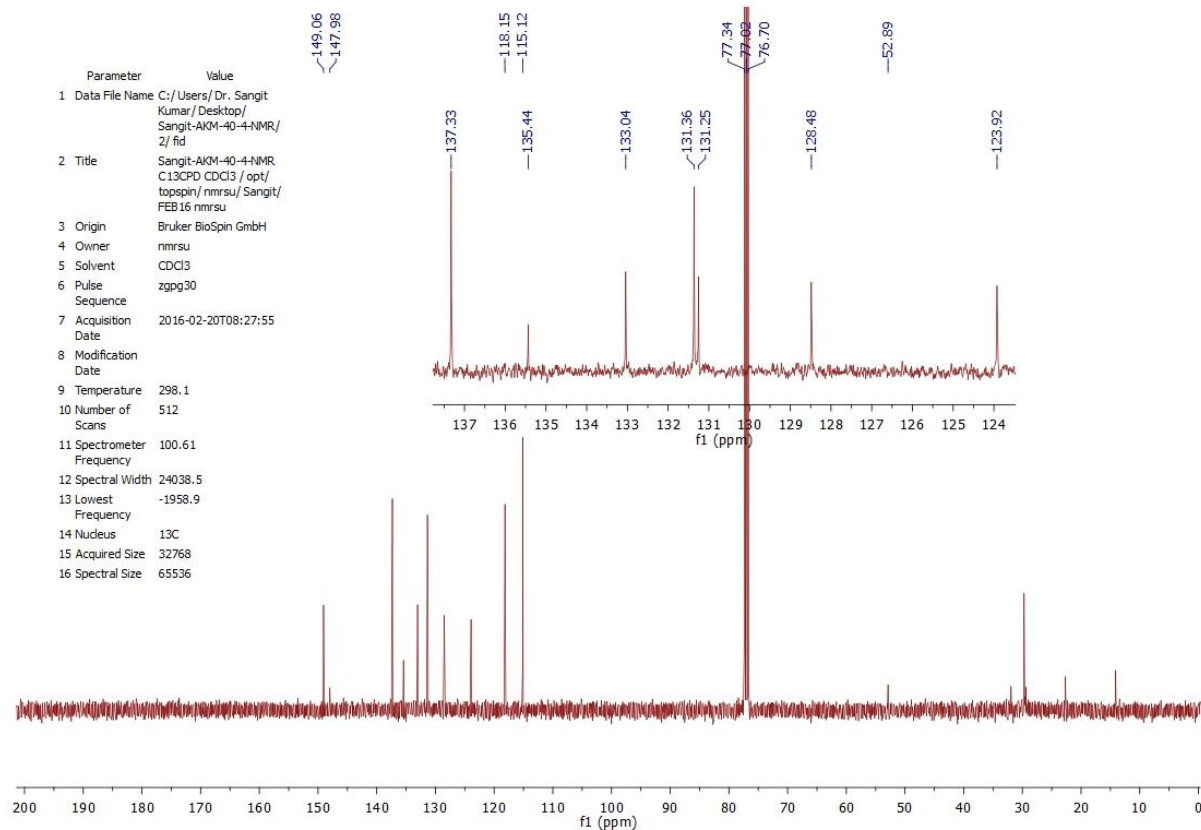



S9 <sup>1</sup>H & <sup>13</sup>C NMR of **9**

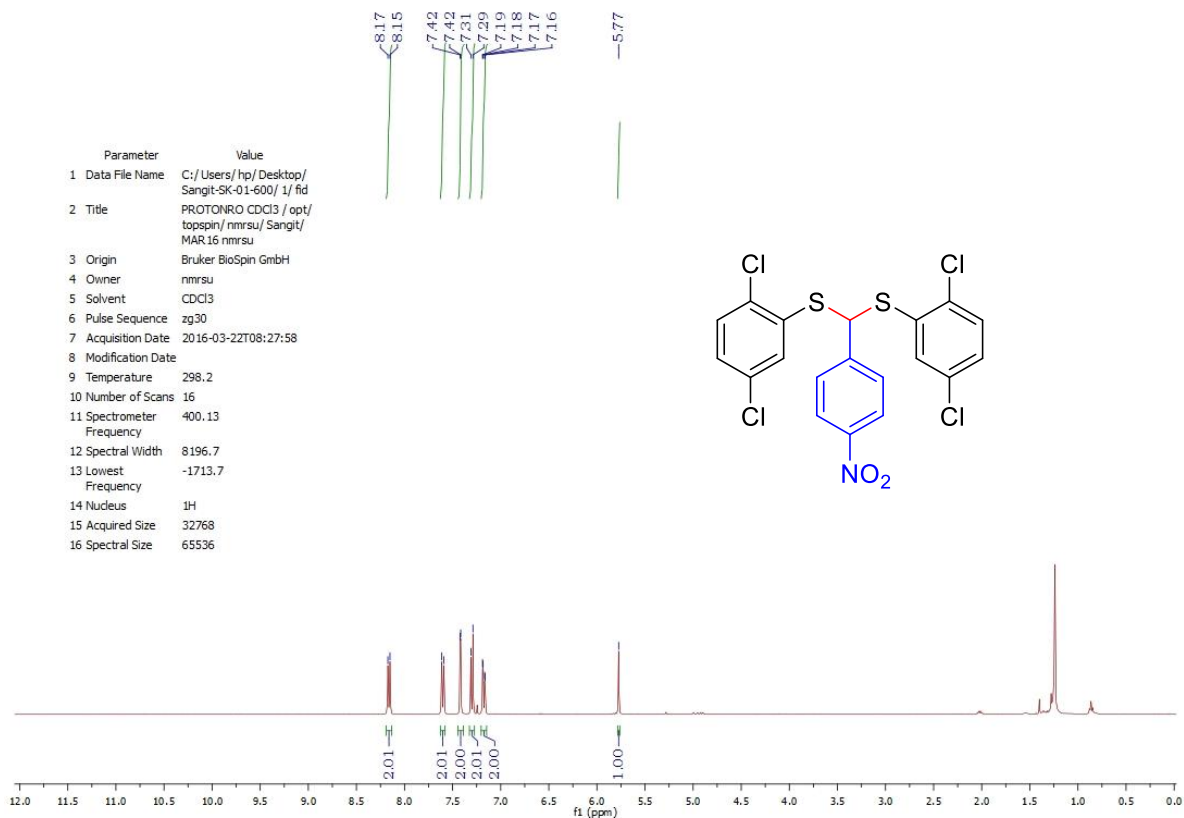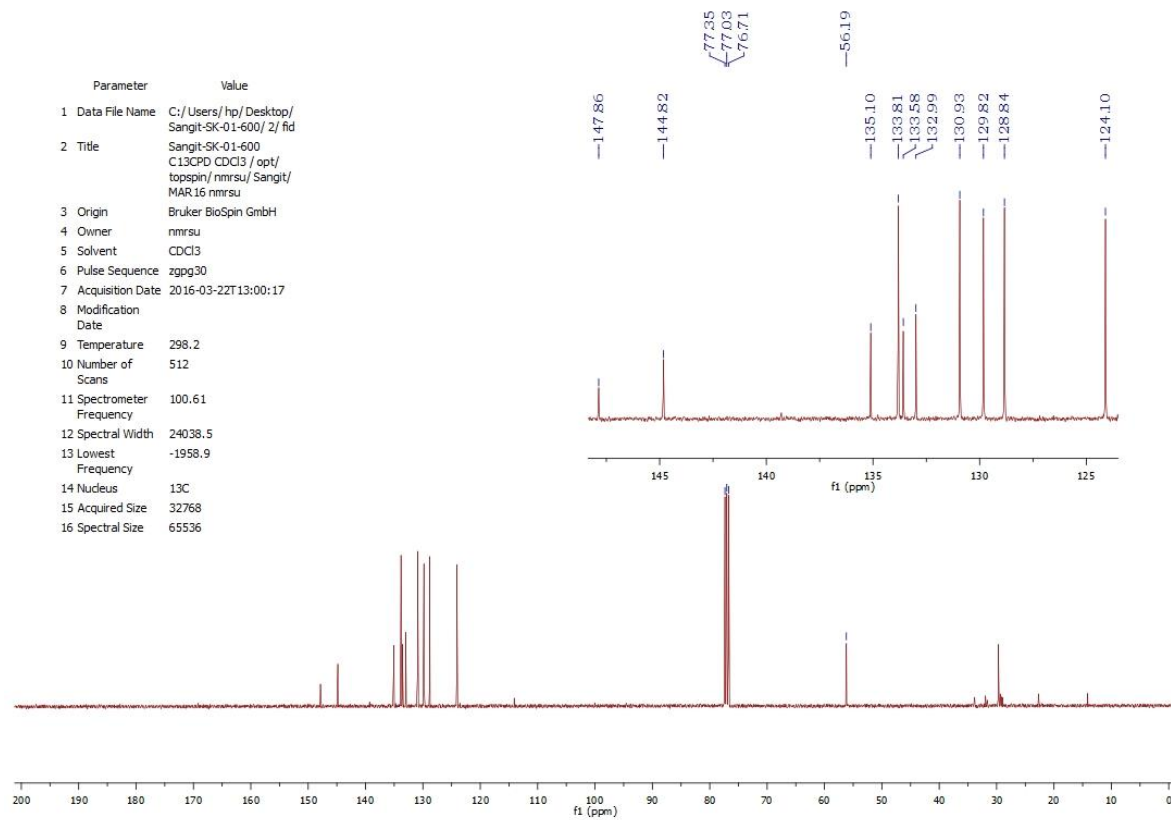

# S10 <sup>1</sup>H & <sup>13</sup>C NMR of 10

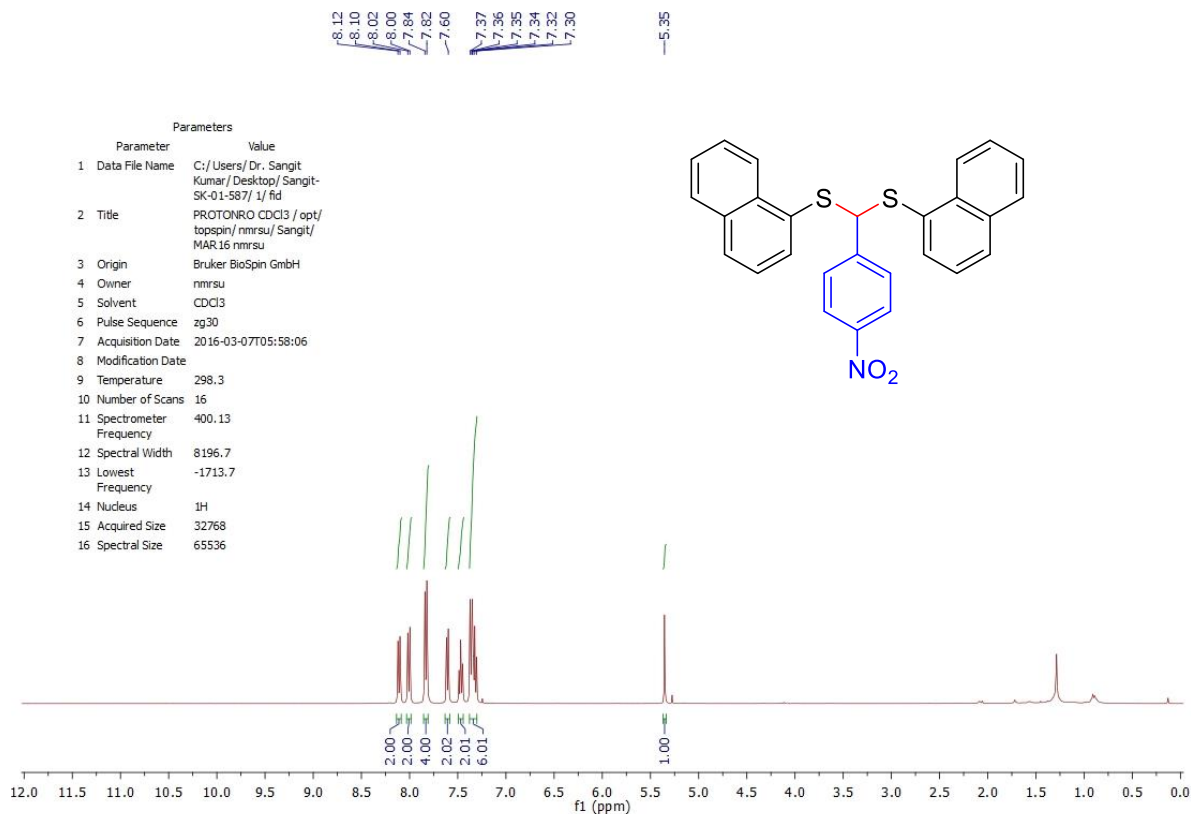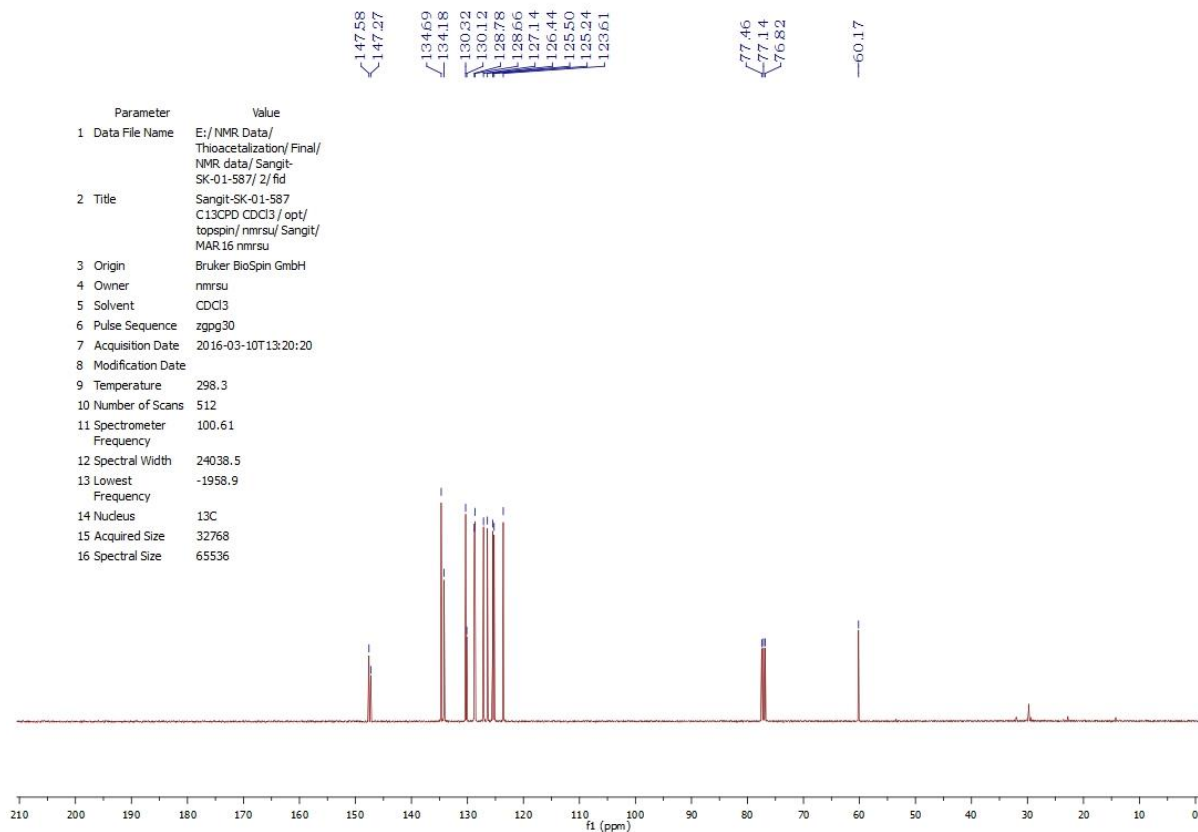

S11 <sup>1</sup>H & <sup>13</sup>C NMR of **11**

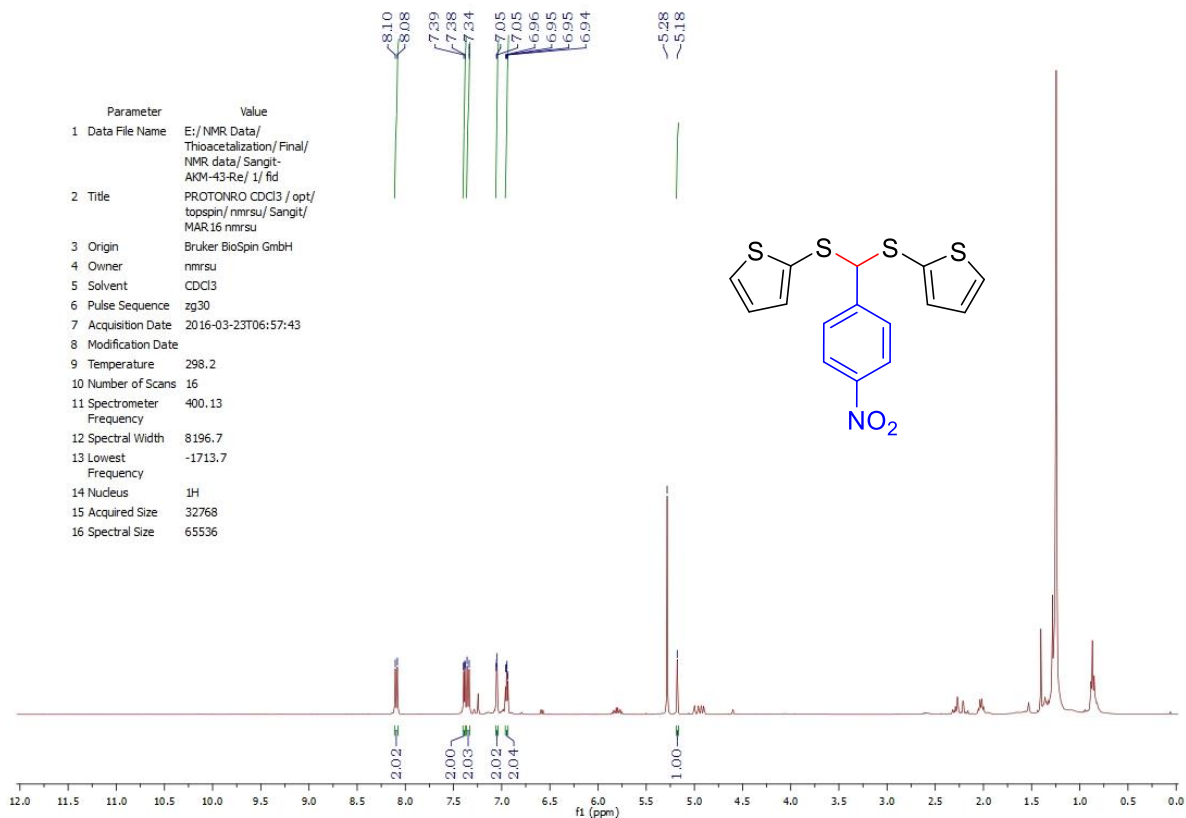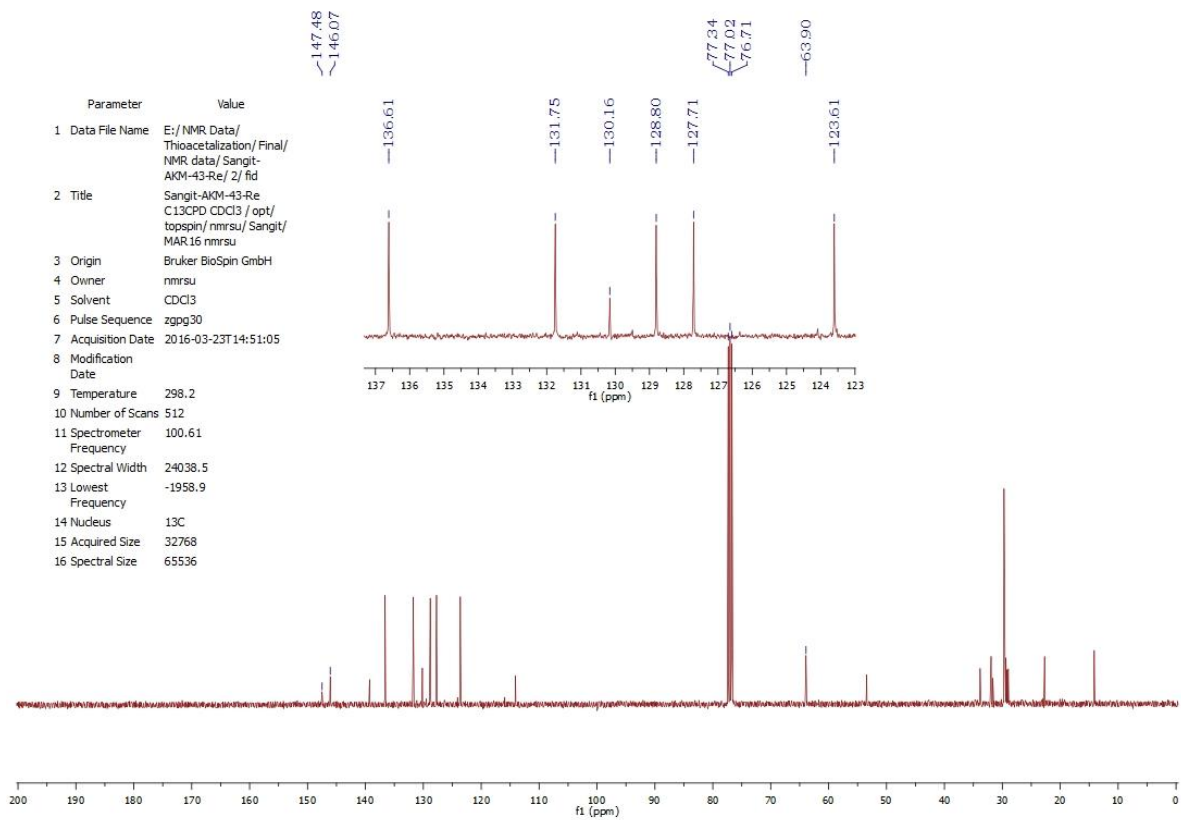

S12 <sup>1</sup>H & <sup>13</sup>C NMR of 12

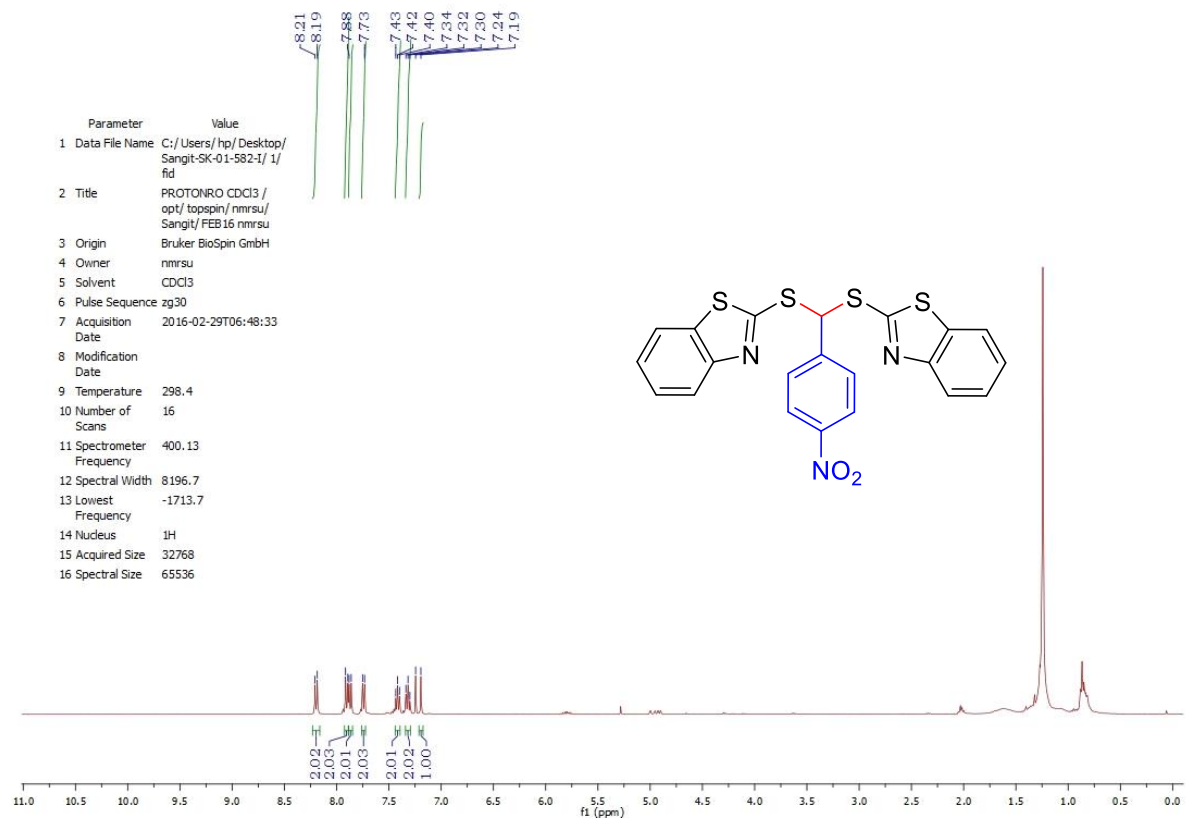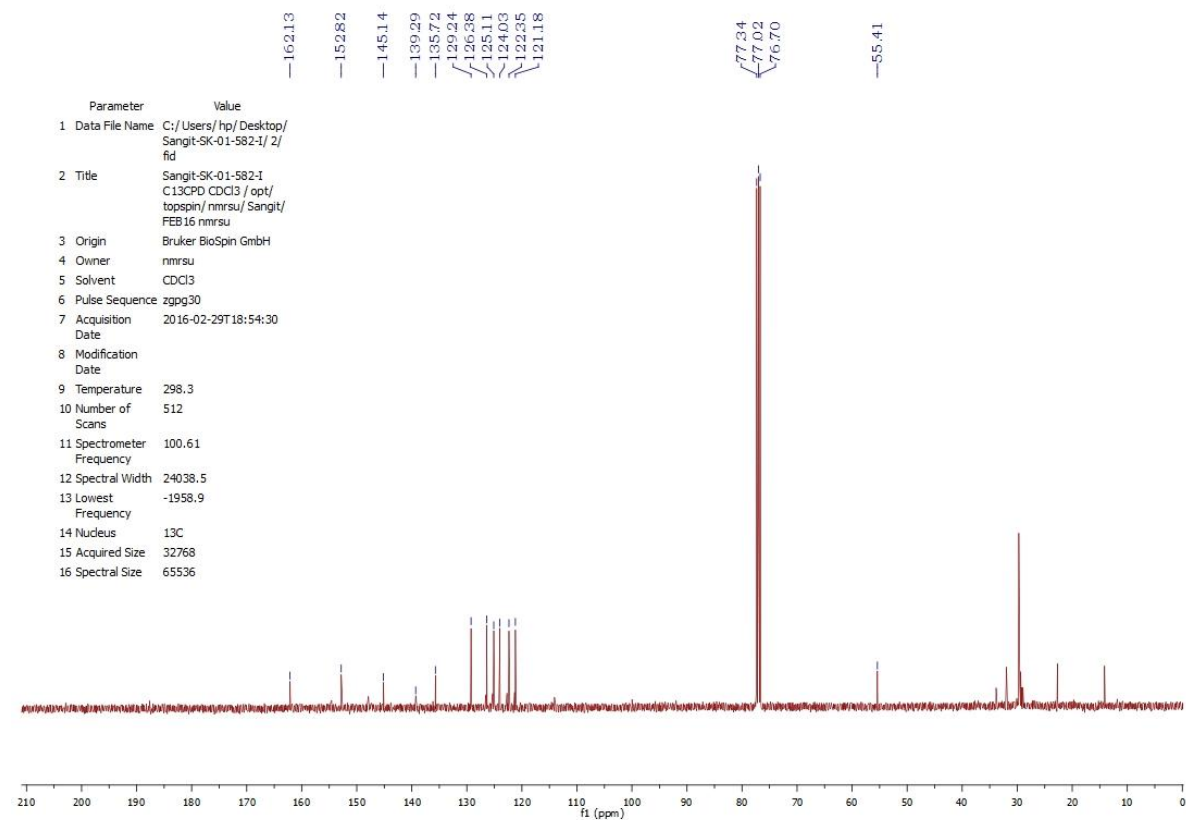

S13 <sup>1</sup>H & <sup>13</sup>C NMR of **13**

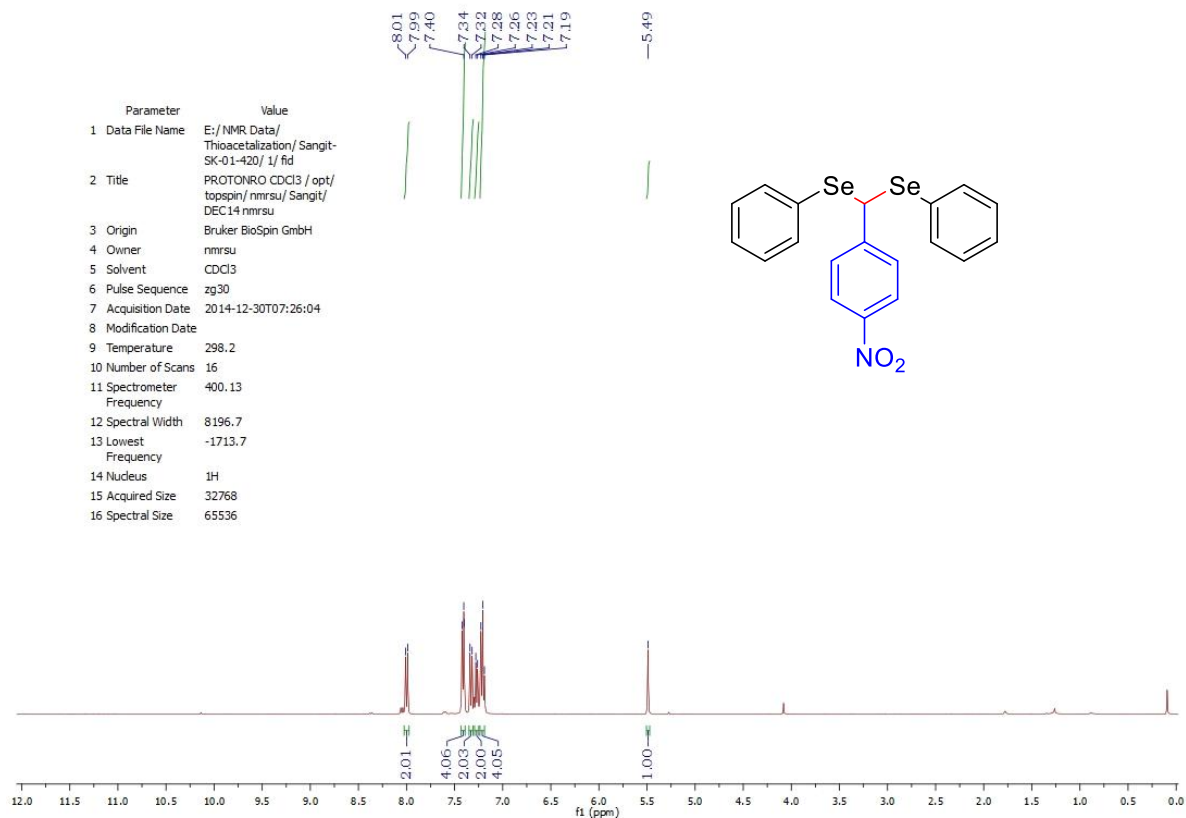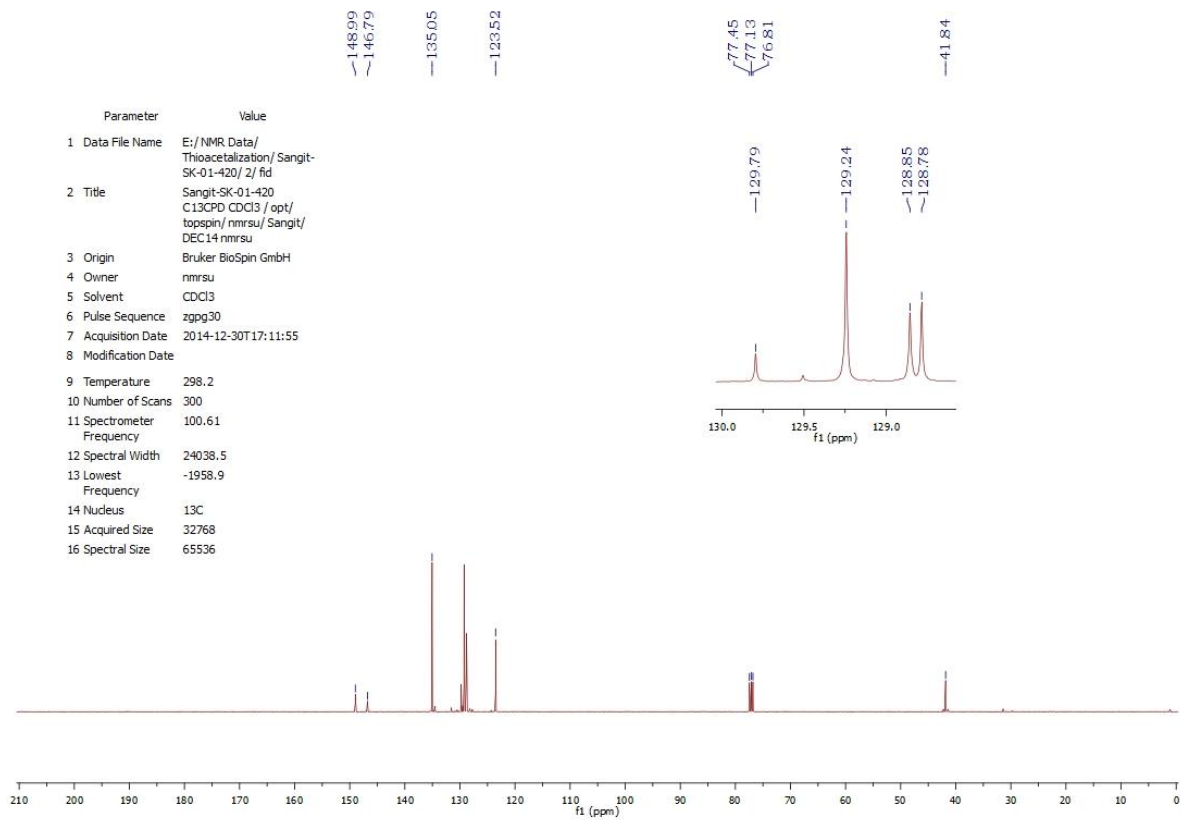

S14 <sup>77</sup>Se NMR of **13**

| Parameter                    | Value                                                                             |
|------------------------------|-----------------------------------------------------------------------------------|
| 1 Data File Name             | E:/NMR Data/<br>Thioacetalization/ Sangit-<br>SK-01-420/ 3/ fid                   |
| 2 Title                      | Sangit-SK-01-420<br>SE77ZG CDCl3 / opt/<br>topspin/ nmrsu/ Sangit/<br>DEC14 nmrsu |
| 3 Origin                     | Bruker BioSpin GmbH                                                               |
| 4 Owner                      | nmrsu                                                                             |
| 5 Solvent                    | CDCl3                                                                             |
| 6 Pulse Sequence             | zg                                                                                |
| 7 Acquisition Date           | 2014-12-30T17:35:10                                                               |
| 8 Modification Date          |                                                                                   |
| 9 Temperature                | 298.2                                                                             |
| 10 Number of Scans           | 512                                                                               |
| 11 Spectrometer<br>Frequency | 76.31                                                                             |
| 12 Spectral Width            | 75757.6                                                                           |
| 13 Lowest Frequency          | 276.6                                                                             |
| 14 Nucleus                   |                                                                                   |
| 15 Acquired Size             | 32768                                                                             |
| 16 Spectral Size             | 65536                                                                             |

— 481.53

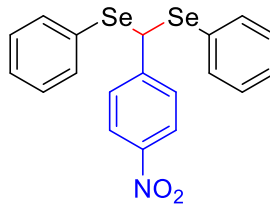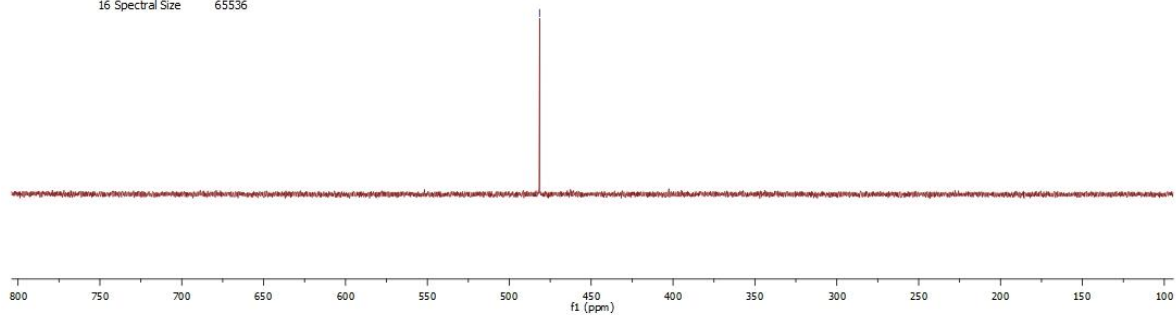

S15 <sup>1</sup>H & <sup>13</sup>C NMR of 14

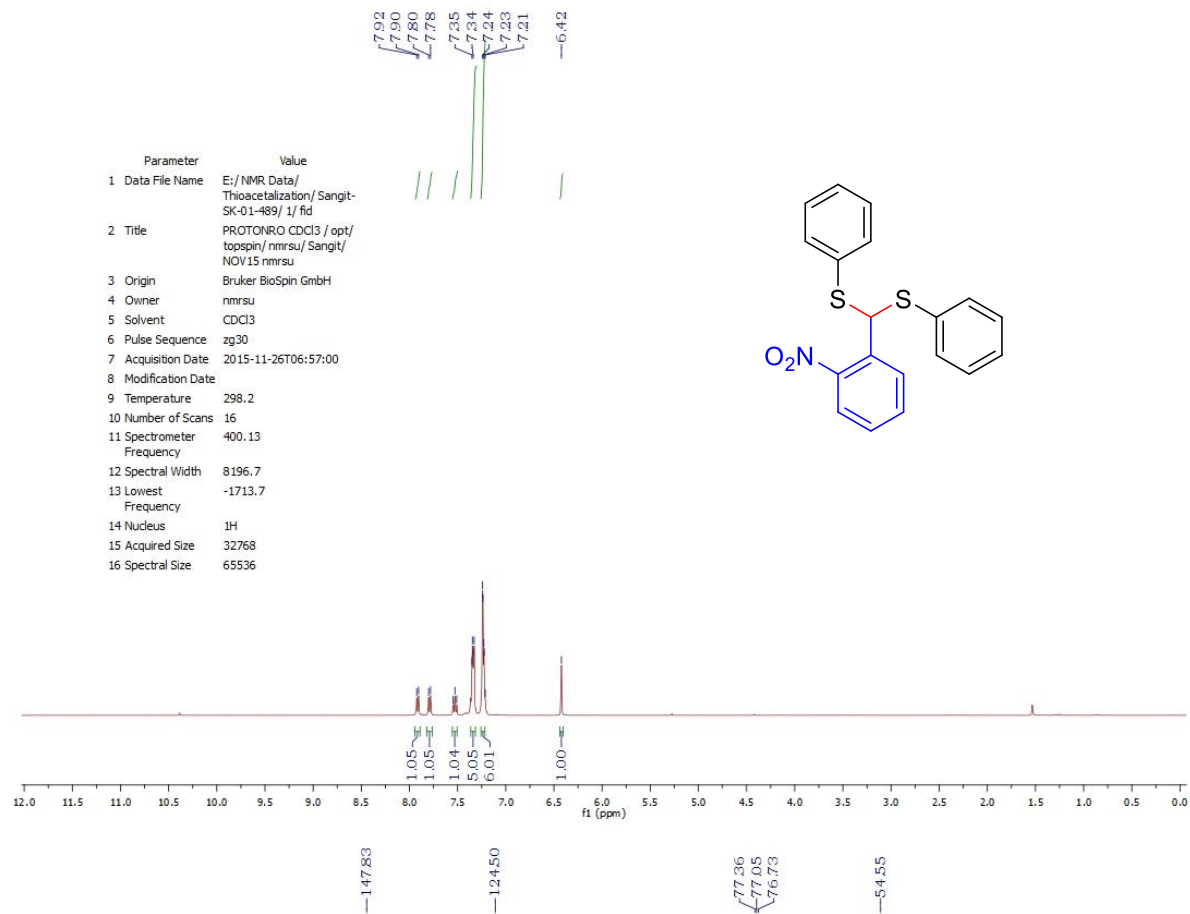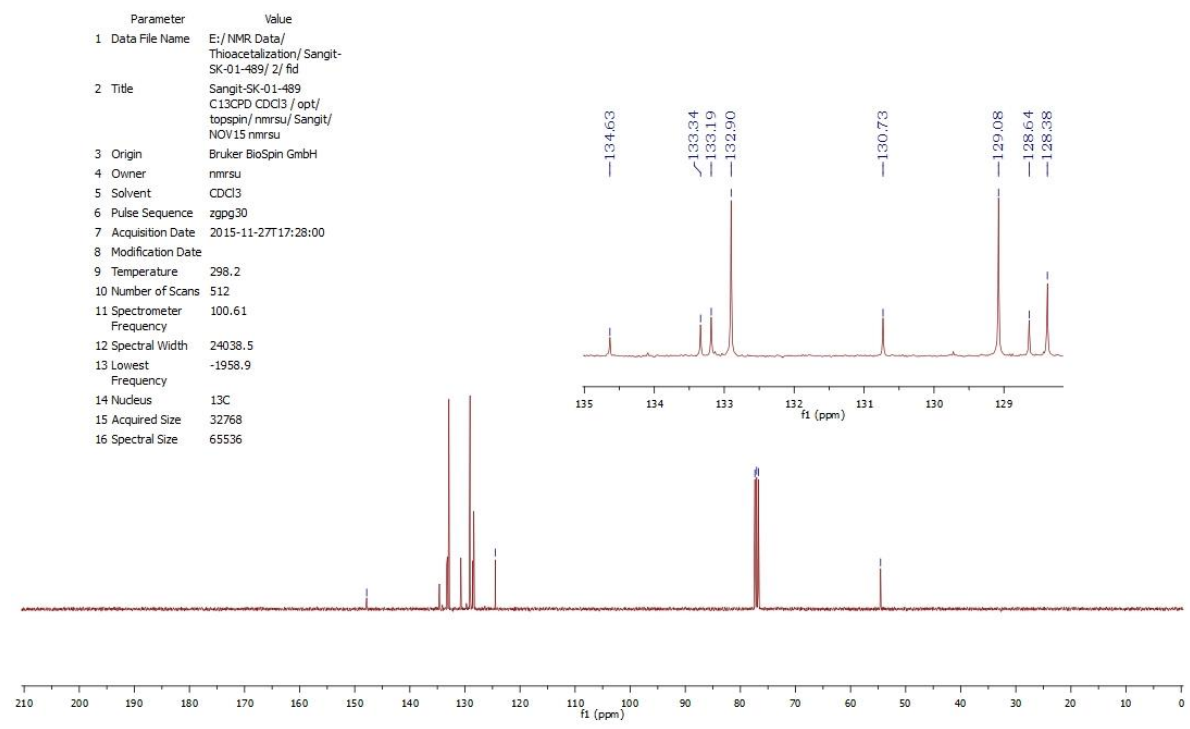

S16 <sup>1</sup>H & <sup>13</sup>C NMR of 15

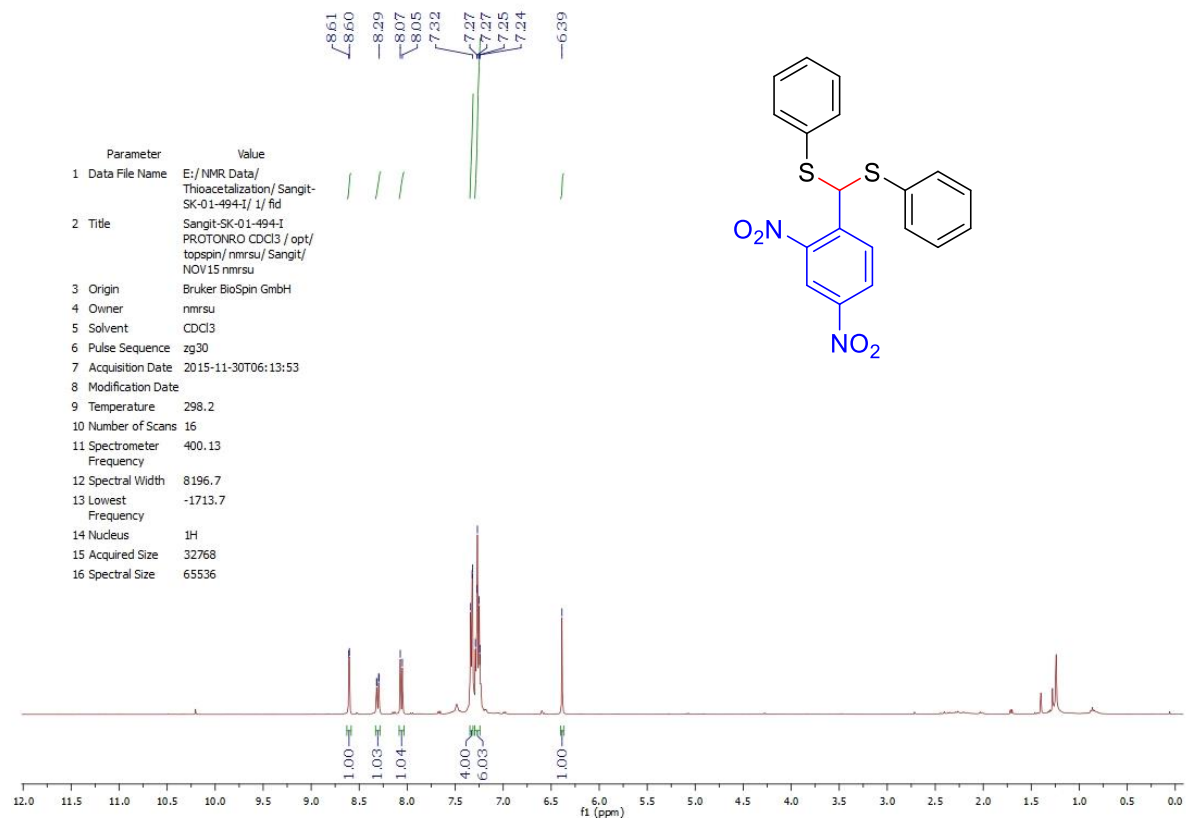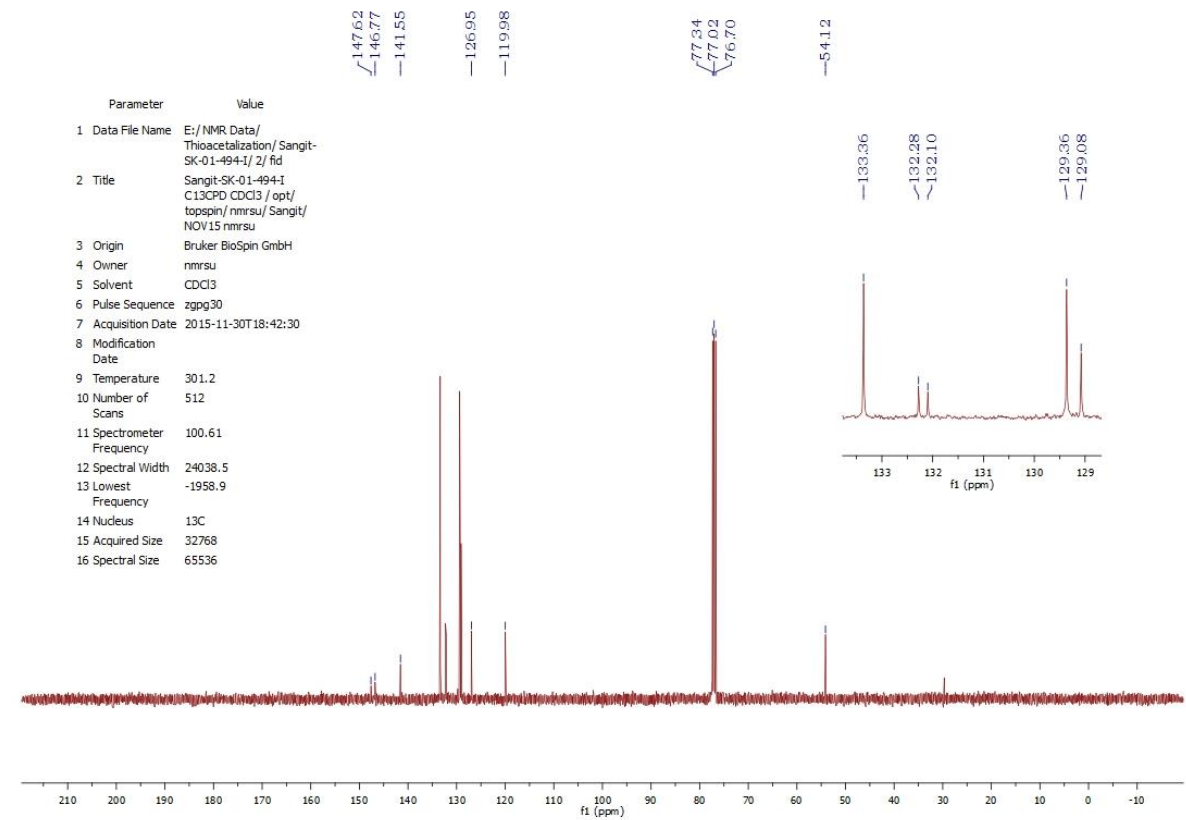



S17 <sup>1</sup>H & <sup>13</sup>C NMR of 16

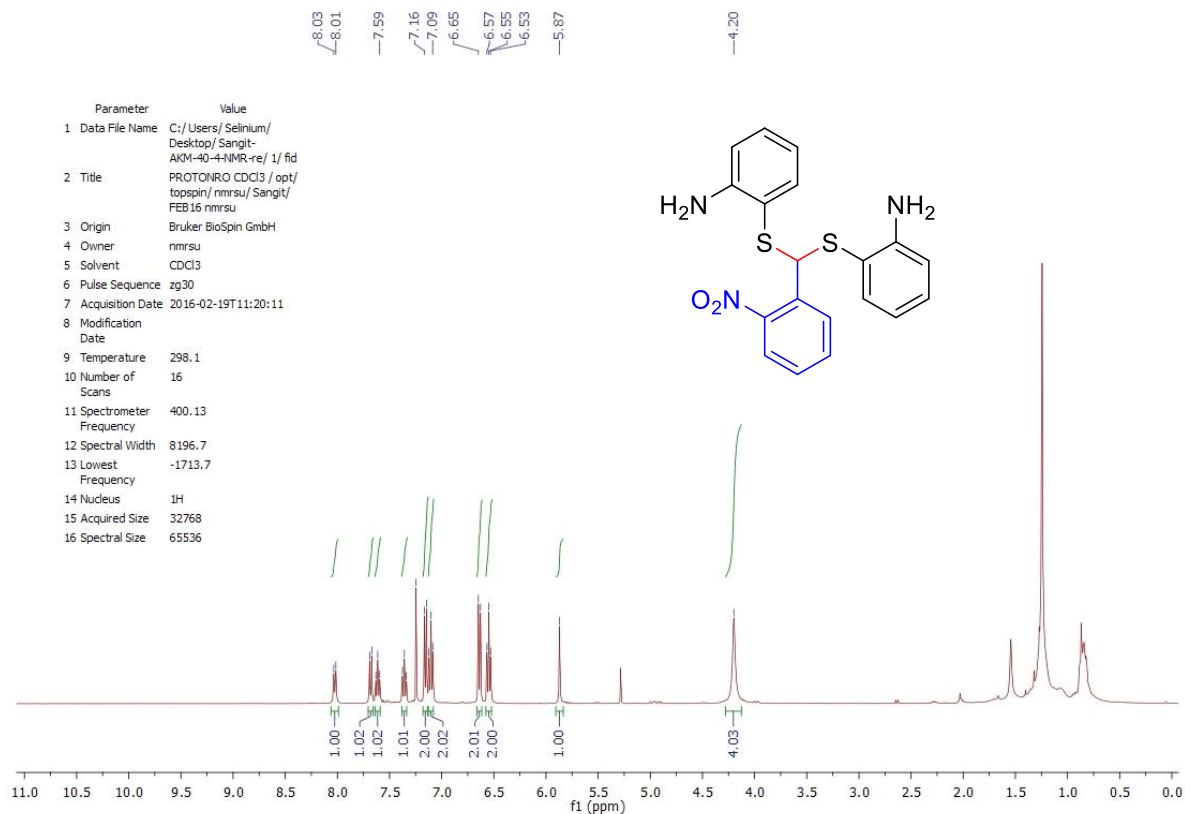

S18 <sup>1</sup>H & <sup>13</sup>C NMR of 17

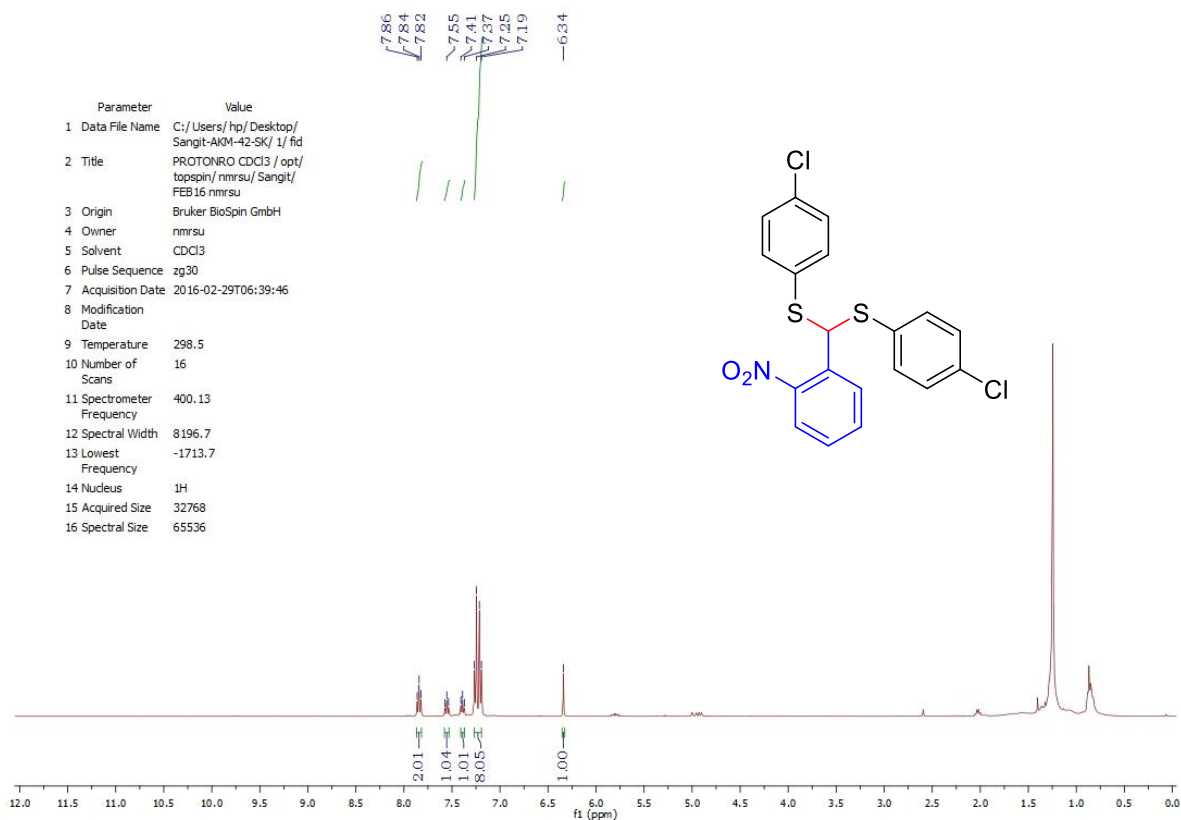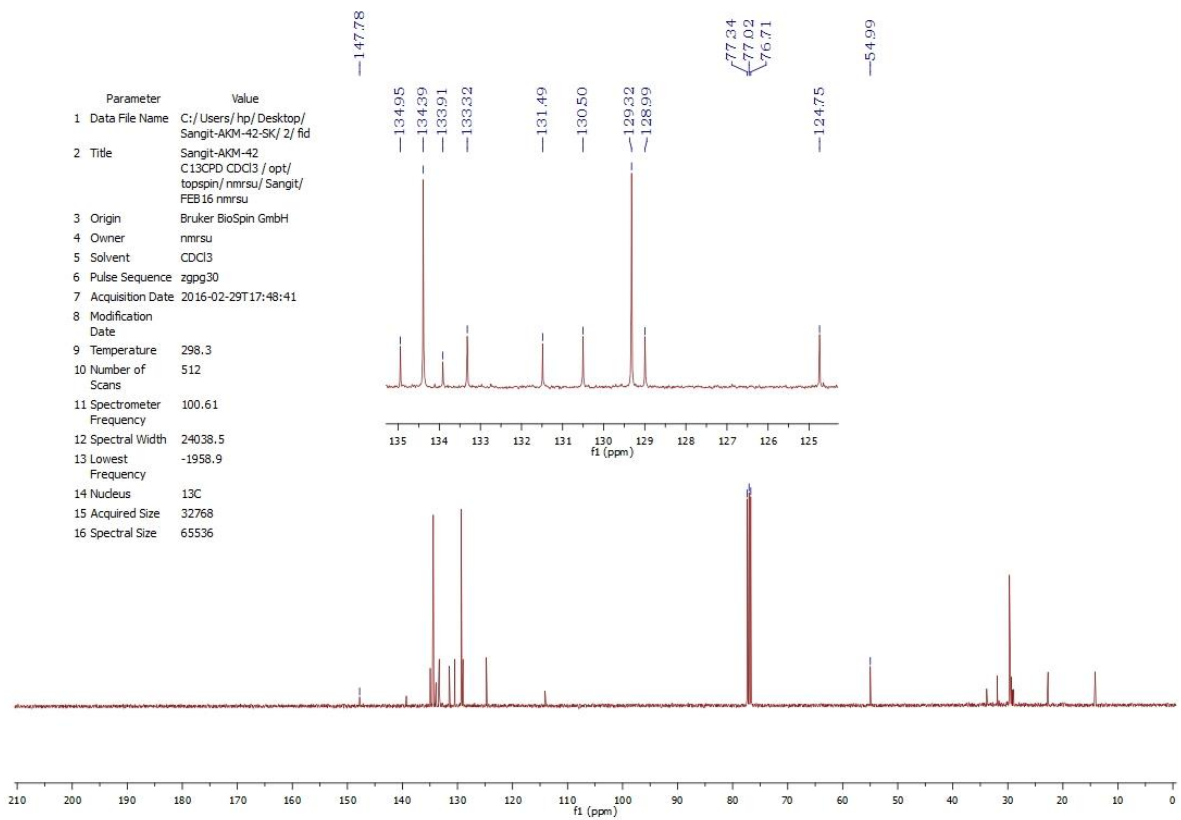

# S19 <sup>1</sup>H & <sup>13</sup>C NMR of 18

7.76  
7.76  
7.74  
7.74  
7.71  
7.71  
7.69  
7.69  
7.55  
7.55  
7.53  
7.53  
7.51  
7.51  
7.31  
7.29  
7.23  
7.21  
7.20  
7.18  
7.17

5.08  
5.06  
5.04  
5.03

1.68  
1.66

| Parameter                 | Value                                                                           |
|---------------------------|---------------------------------------------------------------------------------|
| 1 Data File Name          | F:/owndcloud/<br>grp_sangitkumar_nmr/<br>25-03-16/ Sangit-<br>SK-01-602/ 1/ fid |
| 2 Title                   | Sangit-SK-01-602.1.fid                                                          |
| 3 Origin                  | Bruker BioSpin GmbH                                                             |
| 4 Owner                   | nmrsu                                                                           |
| 5 Solvent                 | CDCl3                                                                           |
| 6 Temperature             | 298.3                                                                           |
| 7 Pulse Sequence          | zg30                                                                            |
| 8 Number of Scans         | 16                                                                              |
| 9 Acquisition Date        | 2016-03-25T11:28:48                                                             |
| 10 Modification Date      | 2016-03-25T11:28:49                                                             |
| 11 Spectrometer Frequency | 400.13                                                                          |
| 12 Spectral Width         | 8196.7                                                                          |
| 13 Lowest Frequency       | -1713.7                                                                         |
| 14 Nucleus                | <sup>1</sup> H                                                                  |
| 15 Acquired Size          | 32768                                                                           |
| 16 Spectral Size          | 65536                                                                           |

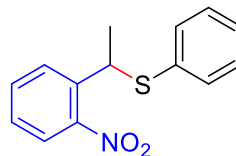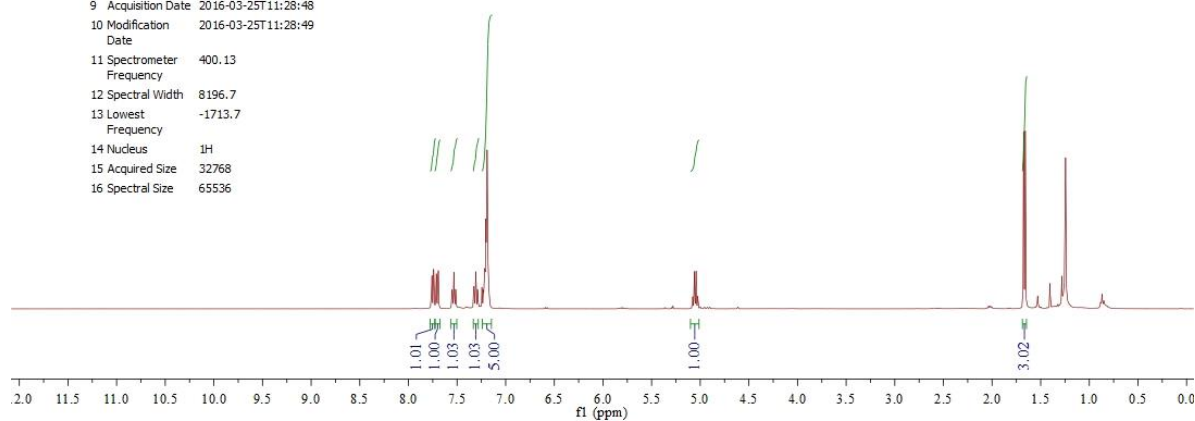

149.14  
138.24  
132.63  
127.69  
124.05

77.35  
77.03  
76.71

42.11

22.18

| Parameter                 | Value                                                                             |
|---------------------------|-----------------------------------------------------------------------------------|
| 1 Data File Name          | G:/Homologation/NMR<br>data/ Sangit-SK-01-602/<br>2/ fid                          |
| 2 Title                   | Sangit-SK-01-602<br>C13CPD CDCl3 / opt/<br>topspin/ nmrsu/ Sangit/<br>MAR16 nmrsu |
| 3 Origin                  | Bruker BioSpin GmbH                                                               |
| 4 Owner                   | nmrsu                                                                             |
| 5 Solvent                 | CDCl3                                                                             |
| 6 Pulse Sequence          | zpgg30                                                                            |
| 7 Acquisition Date        | 2016-03-26T17:55:46                                                               |
| 8 Modification Date       |                                                                                   |
| 9 Temperature             | 298.2                                                                             |
| 10 Number of Scans        | 512                                                                               |
| 11 Spectrometer Frequency | 100.61                                                                            |
| 12 Spectral Width         | 24038.5                                                                           |
| 13 Lowest Frequency       | -1958.9                                                                           |
| 14 Nucleus                | <sup>13</sup> C                                                                   |
| 15 Acquired Size          | 32768                                                                             |
| 16 Spectral Size          | 65536                                                                             |

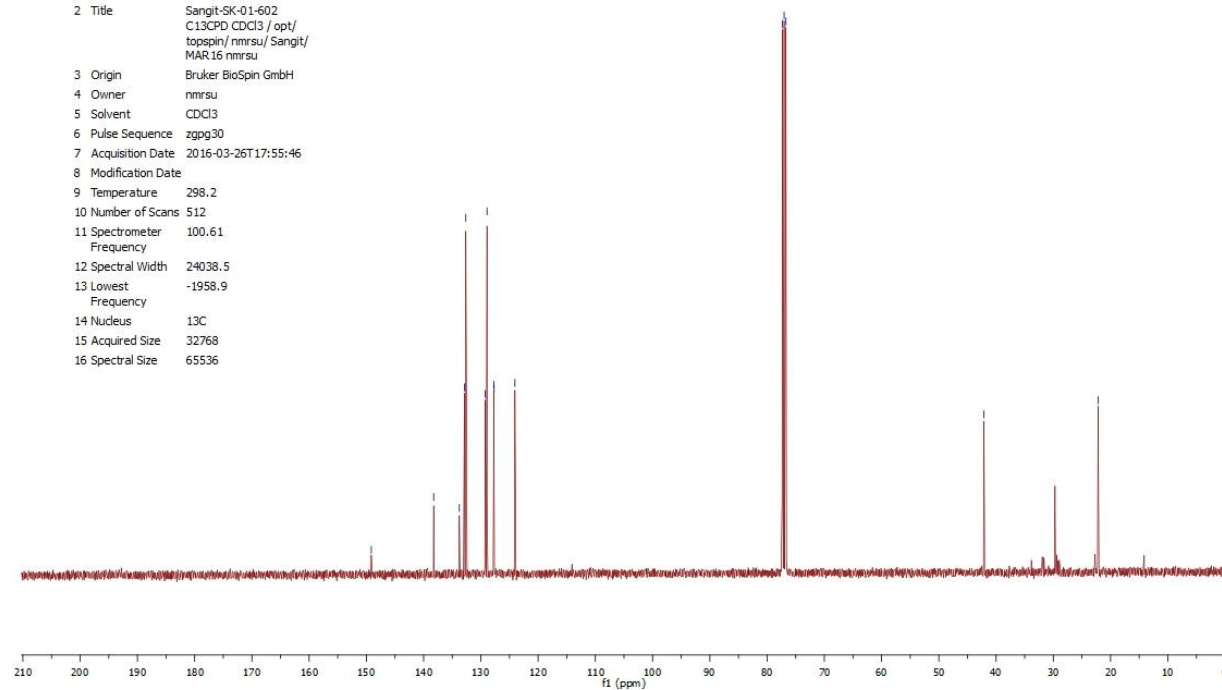

S20 <sup>1</sup>H & <sup>13</sup>C NMR of 19

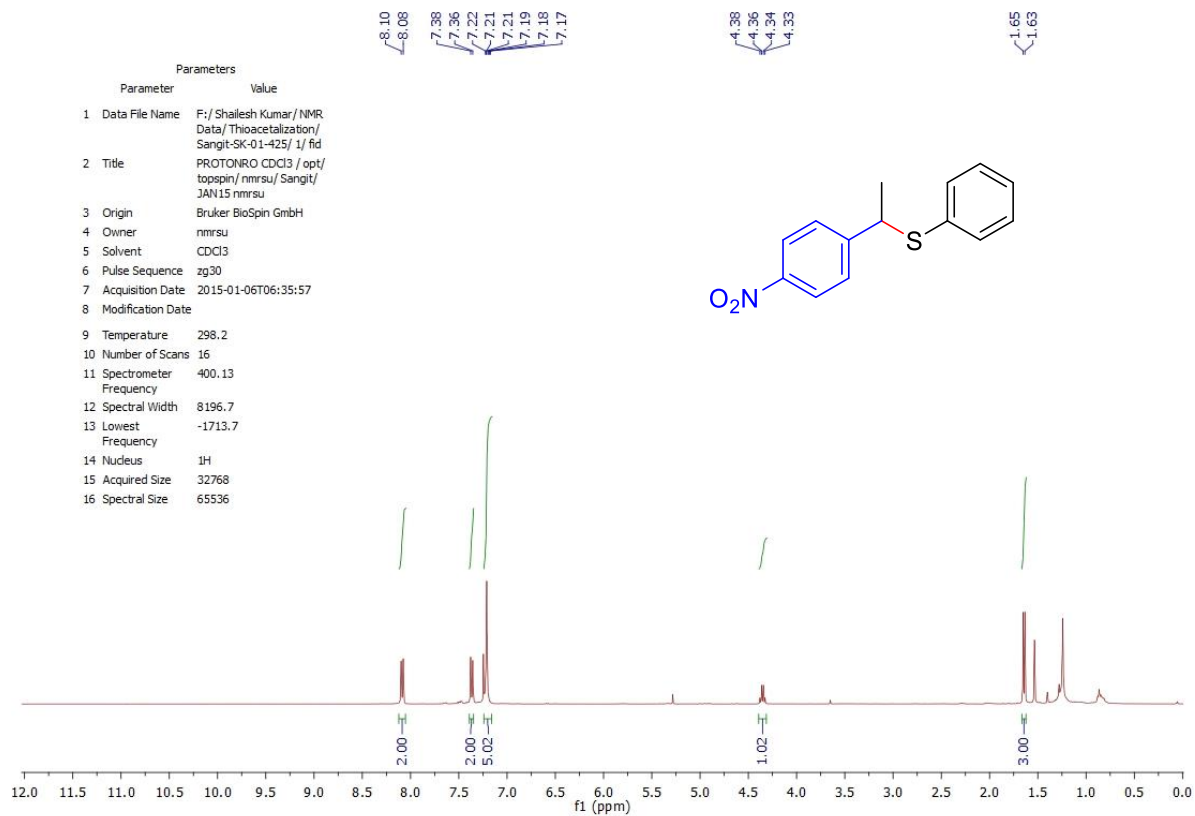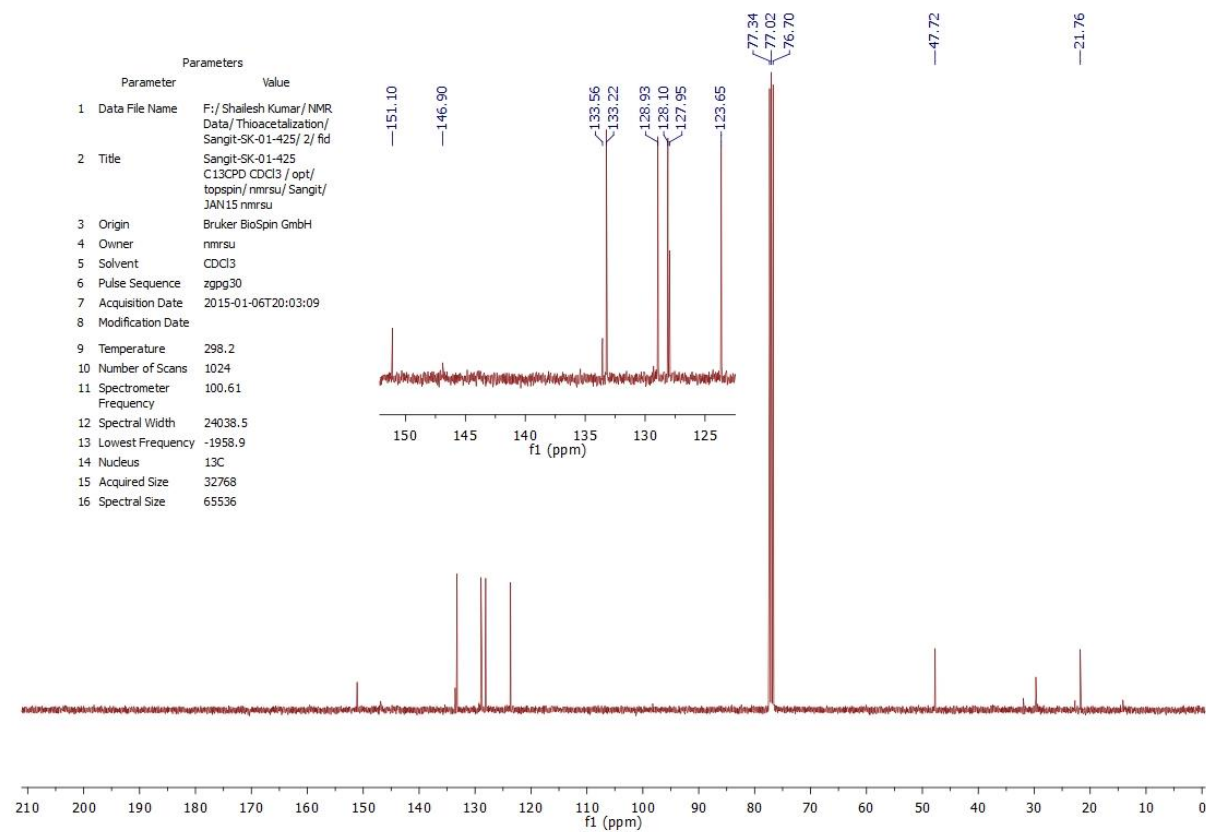

S21 <sup>1</sup>H & <sup>13</sup>C NMR of 20

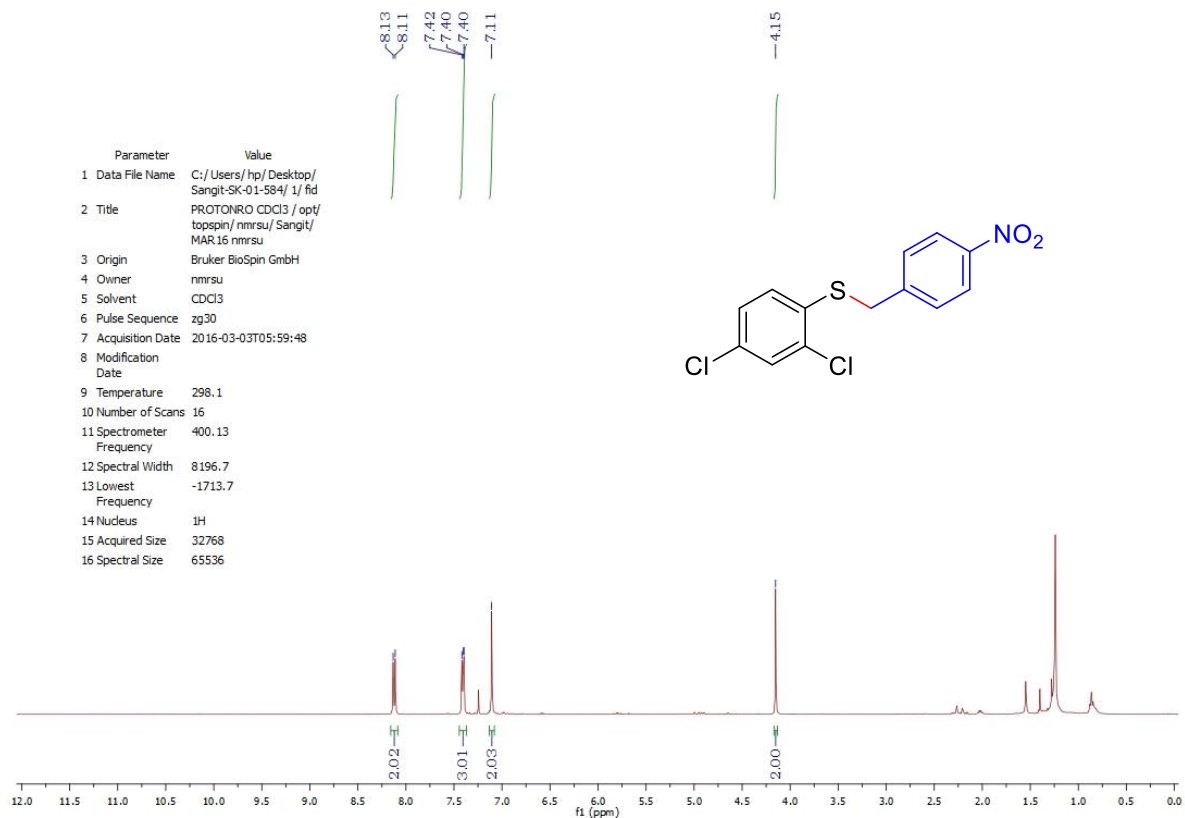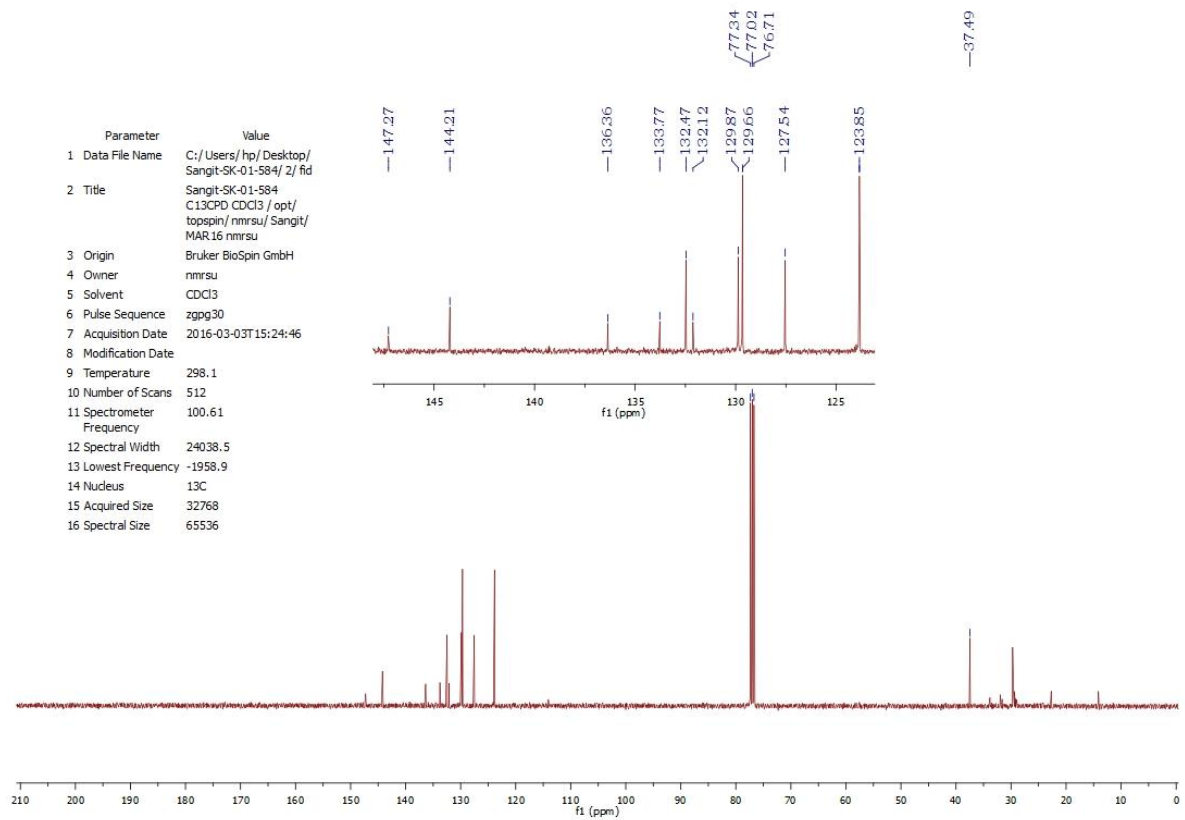

S22 <sup>1</sup>H & <sup>13</sup>C NMR of 21

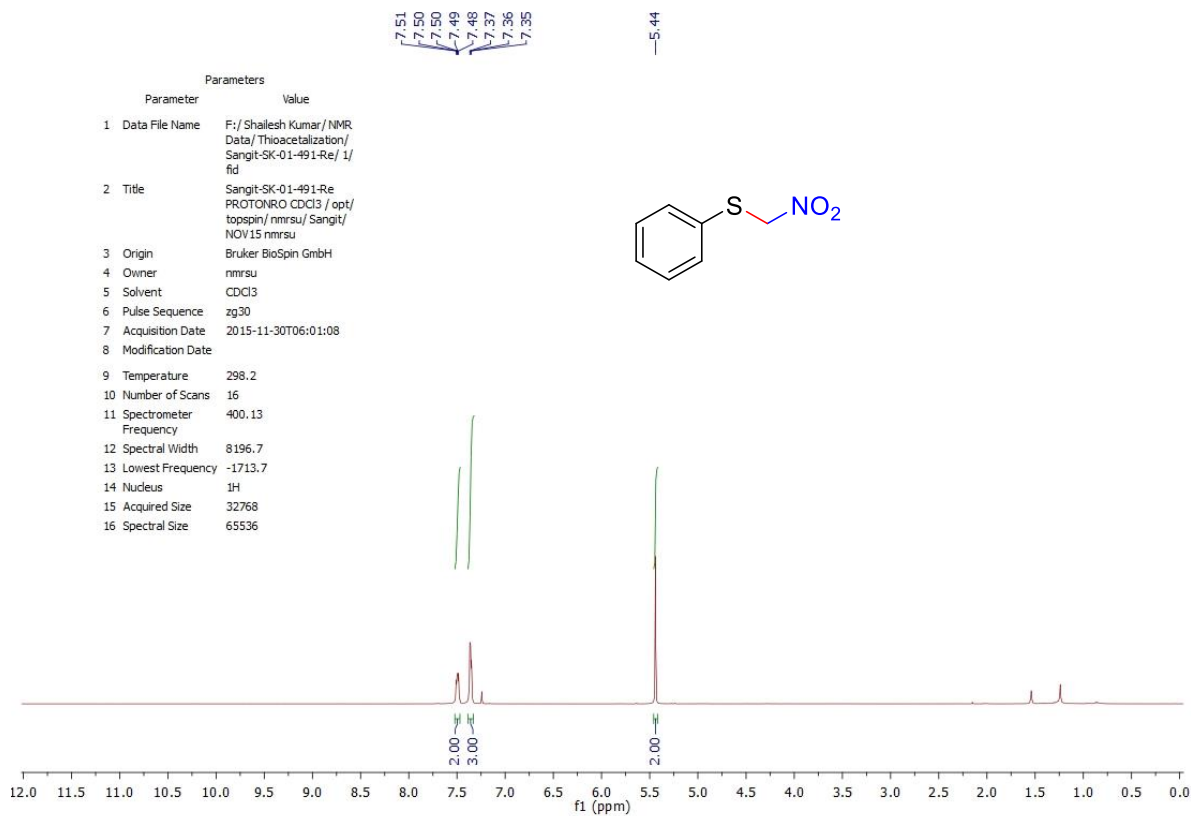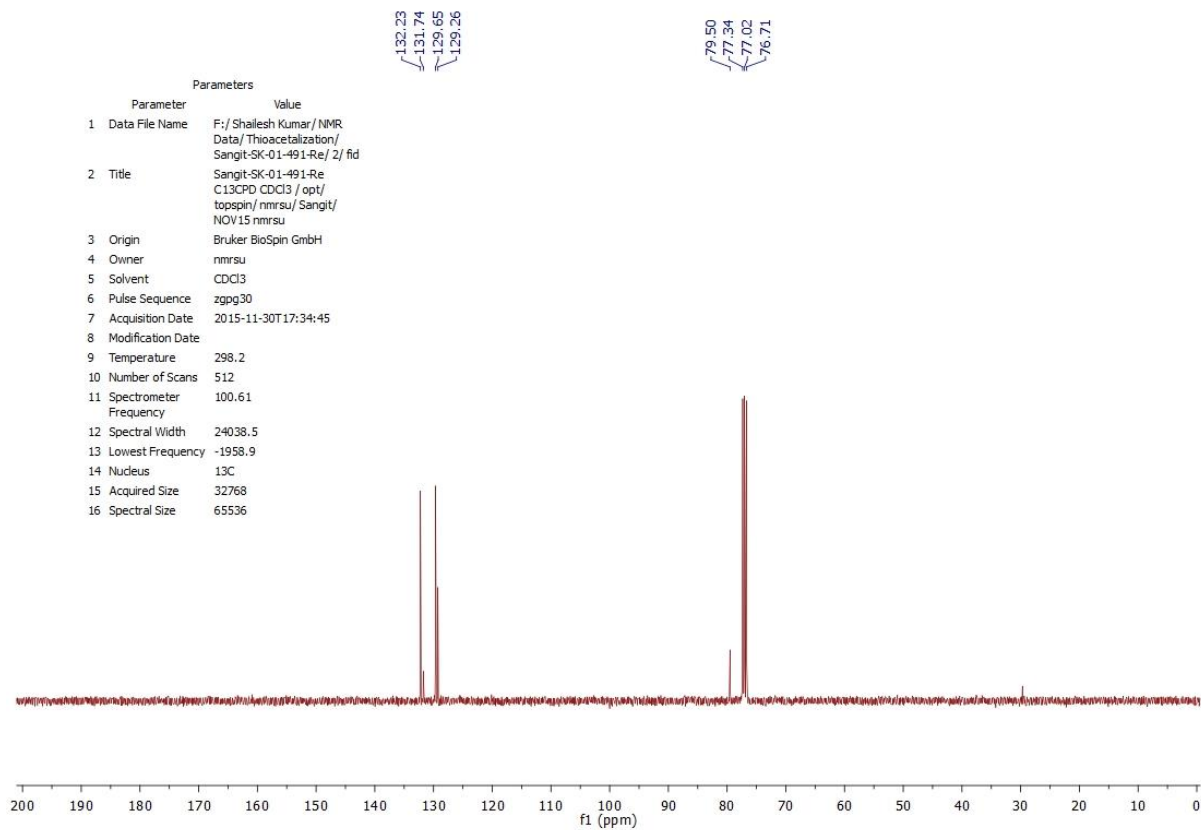

S23 <sup>1</sup>H & <sup>13</sup>C NMR of 22

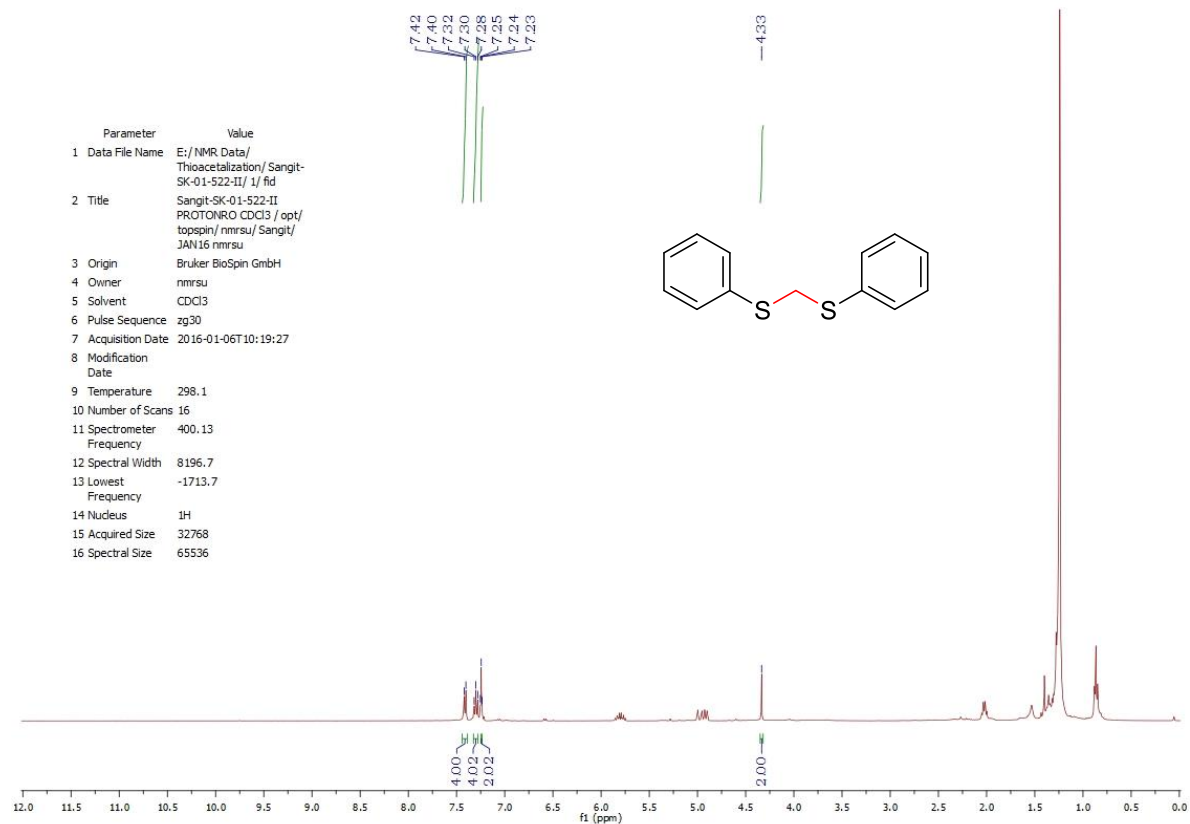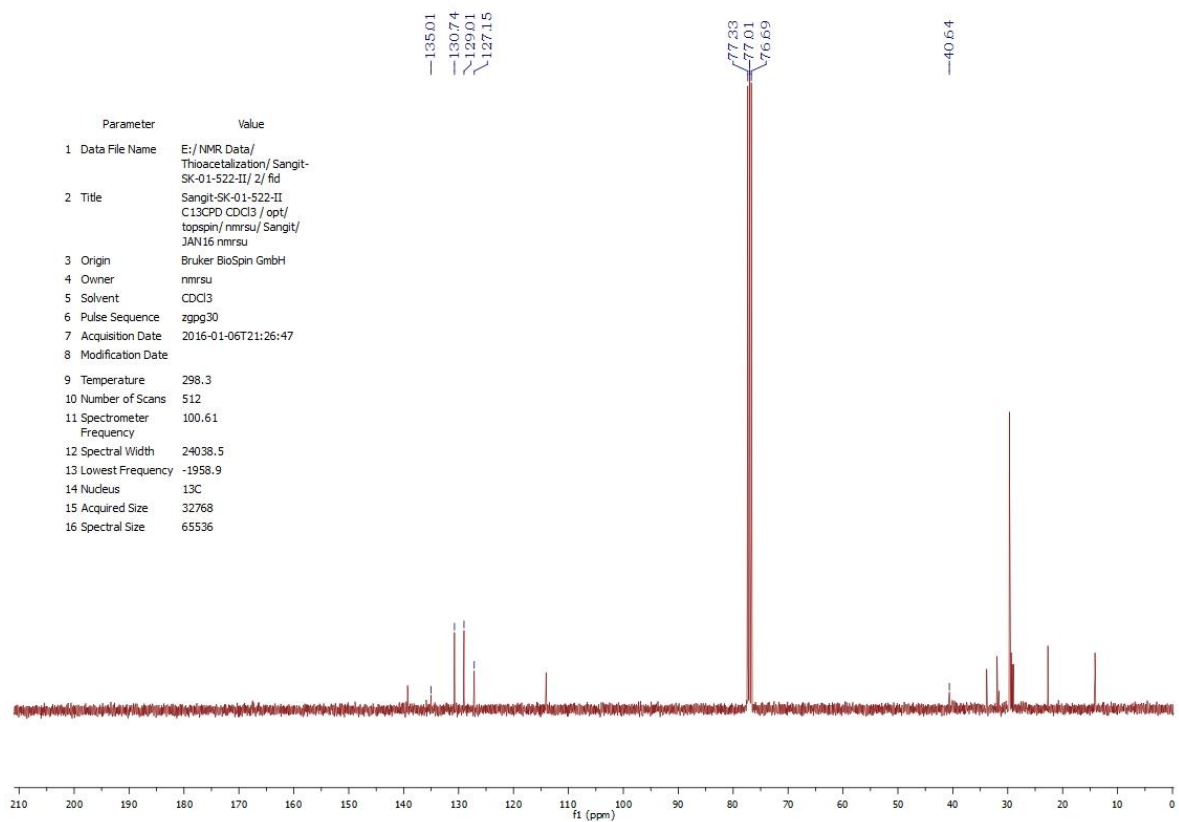

S24 <sup>1</sup>H & <sup>13</sup>C NMR of 23

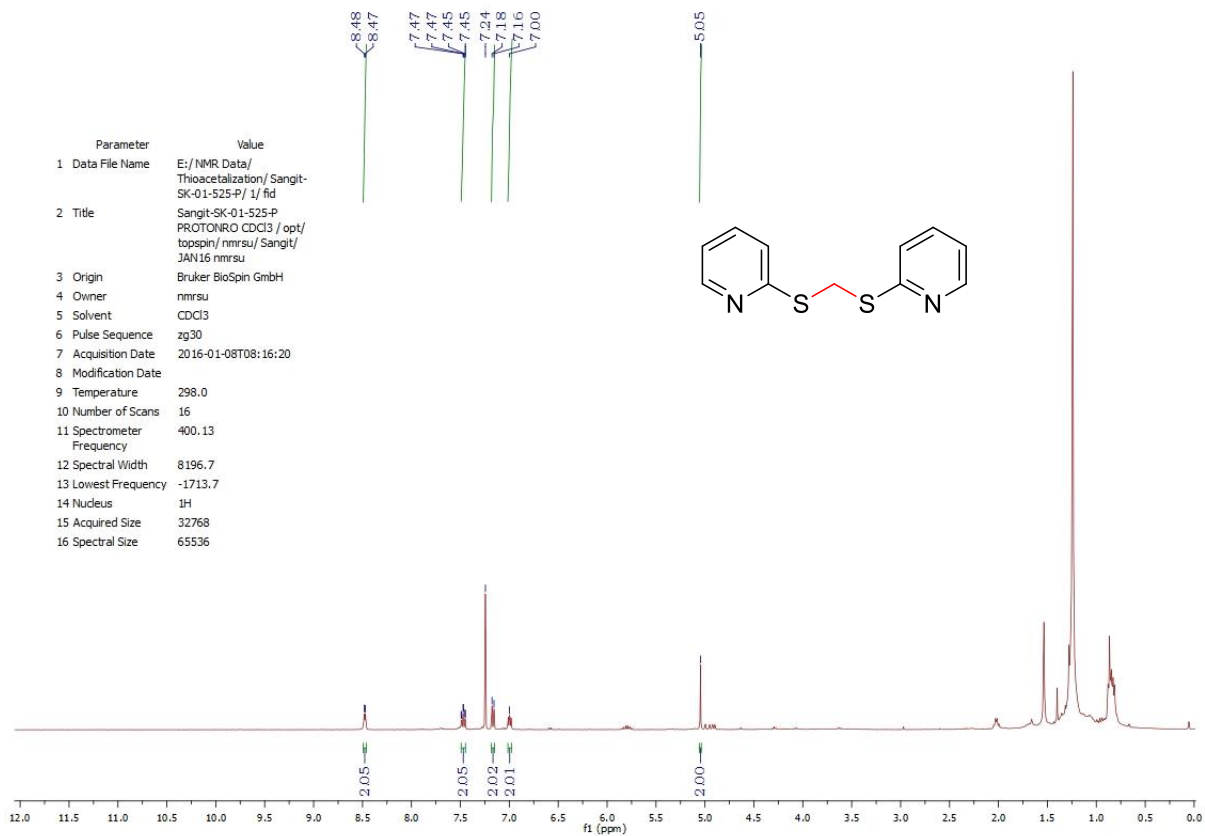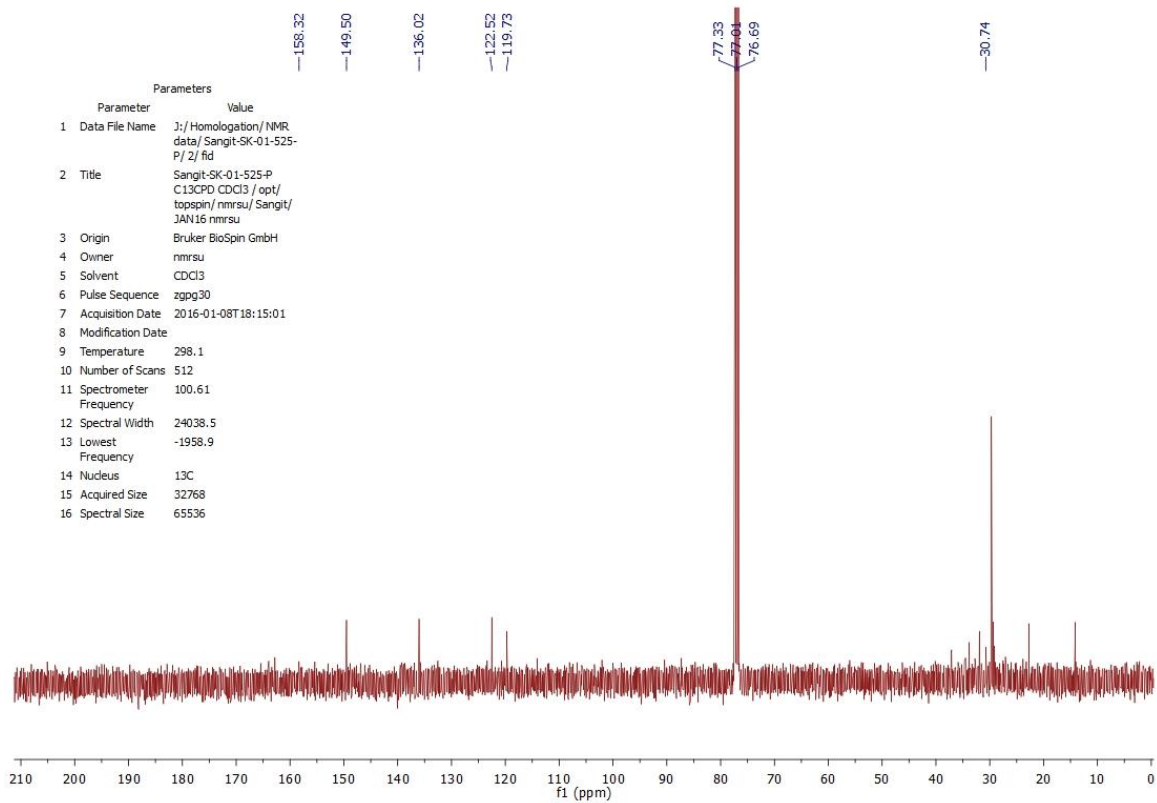



S25 <sup>1</sup>H & <sup>13</sup>C NMR of 24

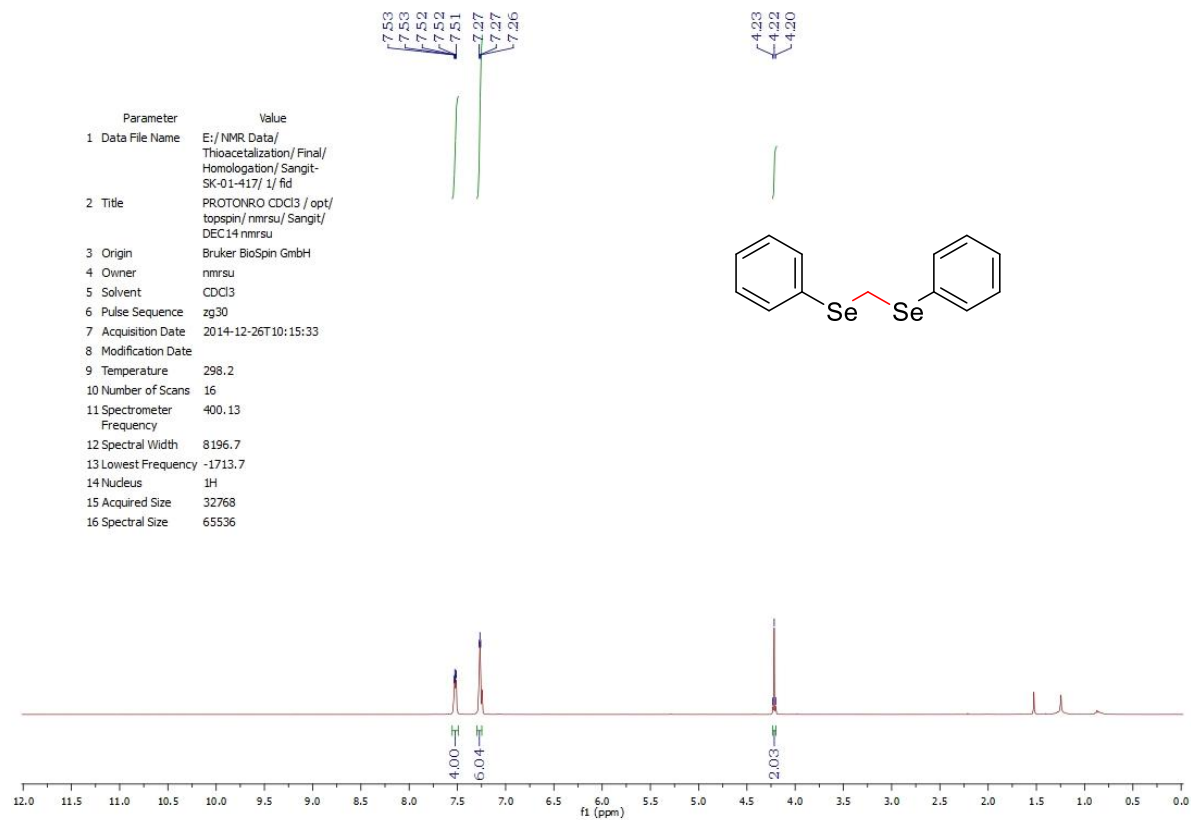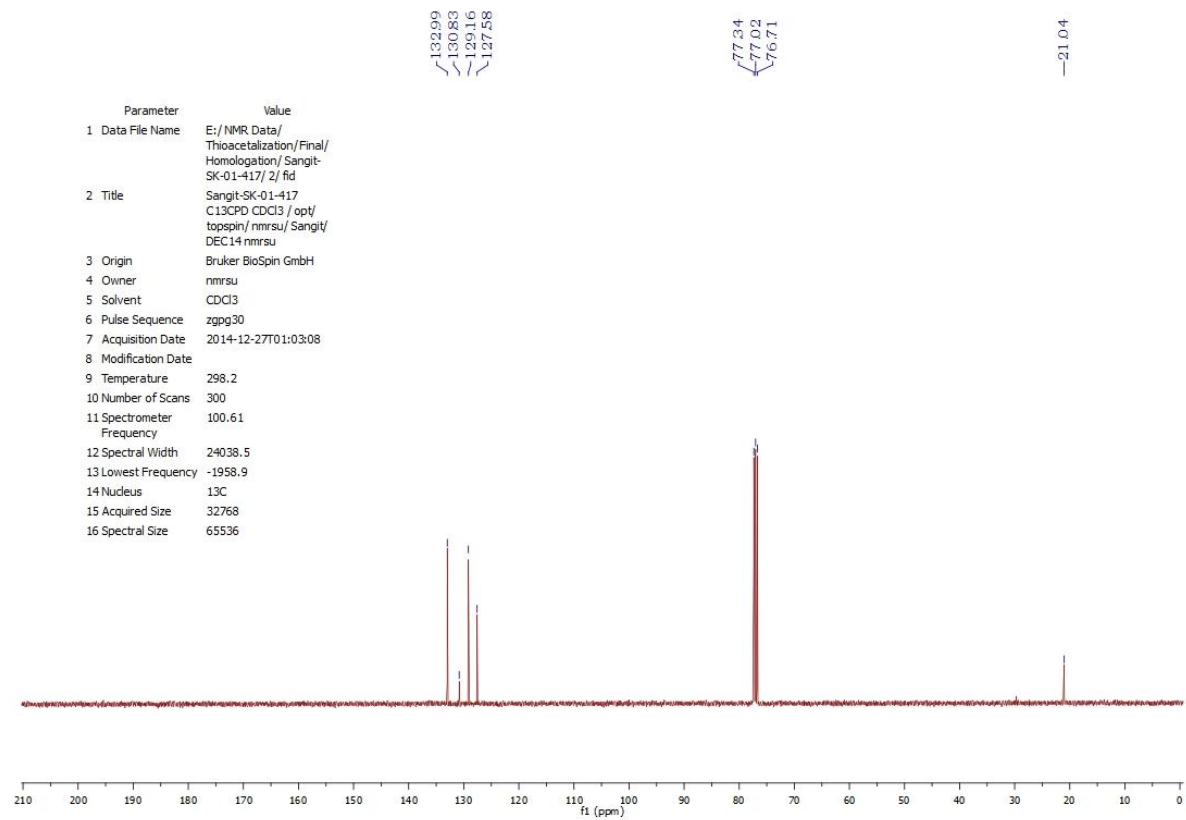

# S26 <sup>77</sup>Se NMR of 24

| Parameter                    | Value                                                                                   |
|------------------------------|-----------------------------------------------------------------------------------------|
| 1 Data File Name             | E:/NMR Data/<br>Thioacetalization/ Final/<br>Homologation/ Sangit-<br>SK-01-417/ 3/ fid |
| 2 Title                      | Sangit-SK-01-417<br>SE77ZG CDCl3 / opt/ topspin/<br>nmrsu/ Sangit/ DEC14 nmrsu          |
| 3 Origin                     | Bruker BioSpin GmbH                                                                     |
| 4 Owner                      | nmrsu                                                                                   |
| 5 Solvent                    | CDCl3                                                                                   |
| 6 Pulse Sequence             | zg                                                                                      |
| 7 Acquisition Date           | 2014-12-27T01:15:54                                                                     |
| 8 Modification Date          |                                                                                         |
| 9 Temperature                | 298.3                                                                                   |
| 10 Number of Scans           | 256                                                                                     |
| 11 Spectrometer<br>Frequency | 76.31                                                                                   |
| 12 Spectral Width            | 75757.6                                                                                 |
| 13 Lowest Frequency          | 276.6                                                                                   |
| 14 Nucleus                   |                                                                                         |
| 15 Acquired Size             | 32768                                                                                   |
| 16 Spectral Size             | 65536                                                                                   |

—345.84

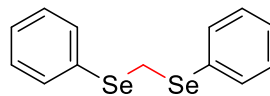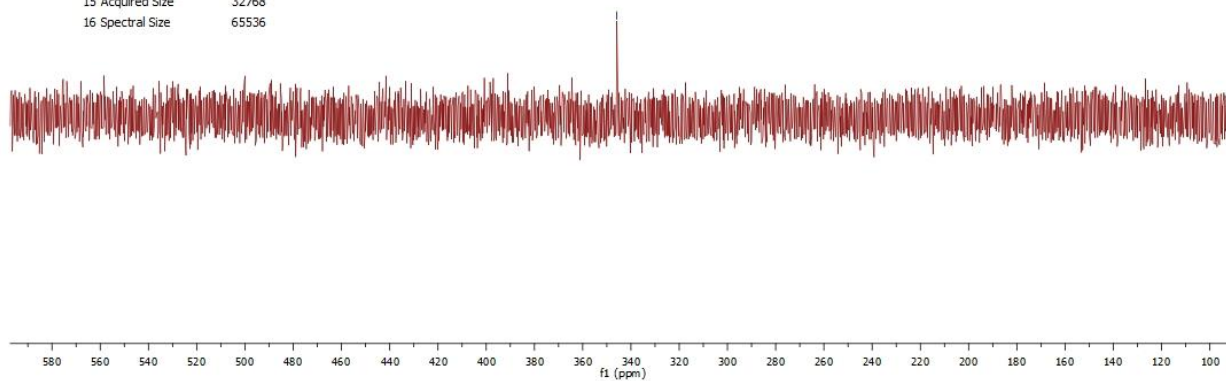

S27 <sup>1</sup>H & <sup>13</sup>C NMR of 25

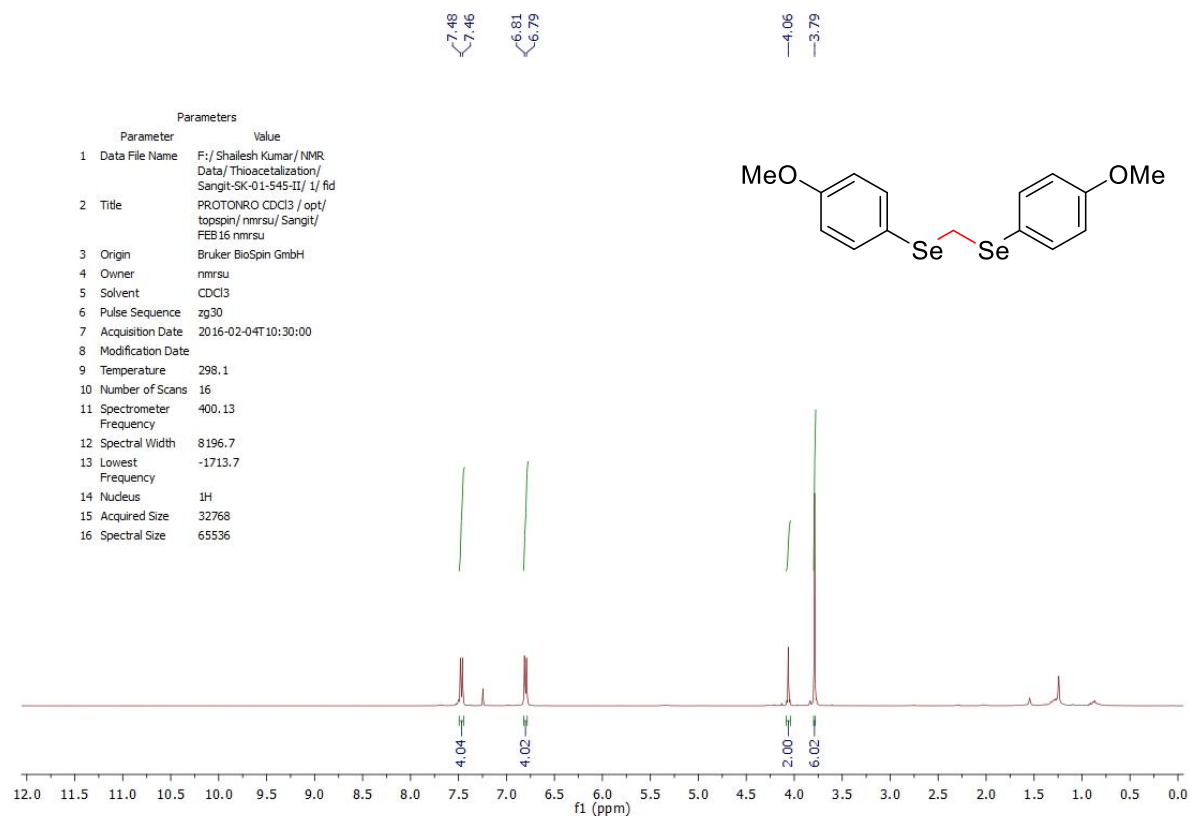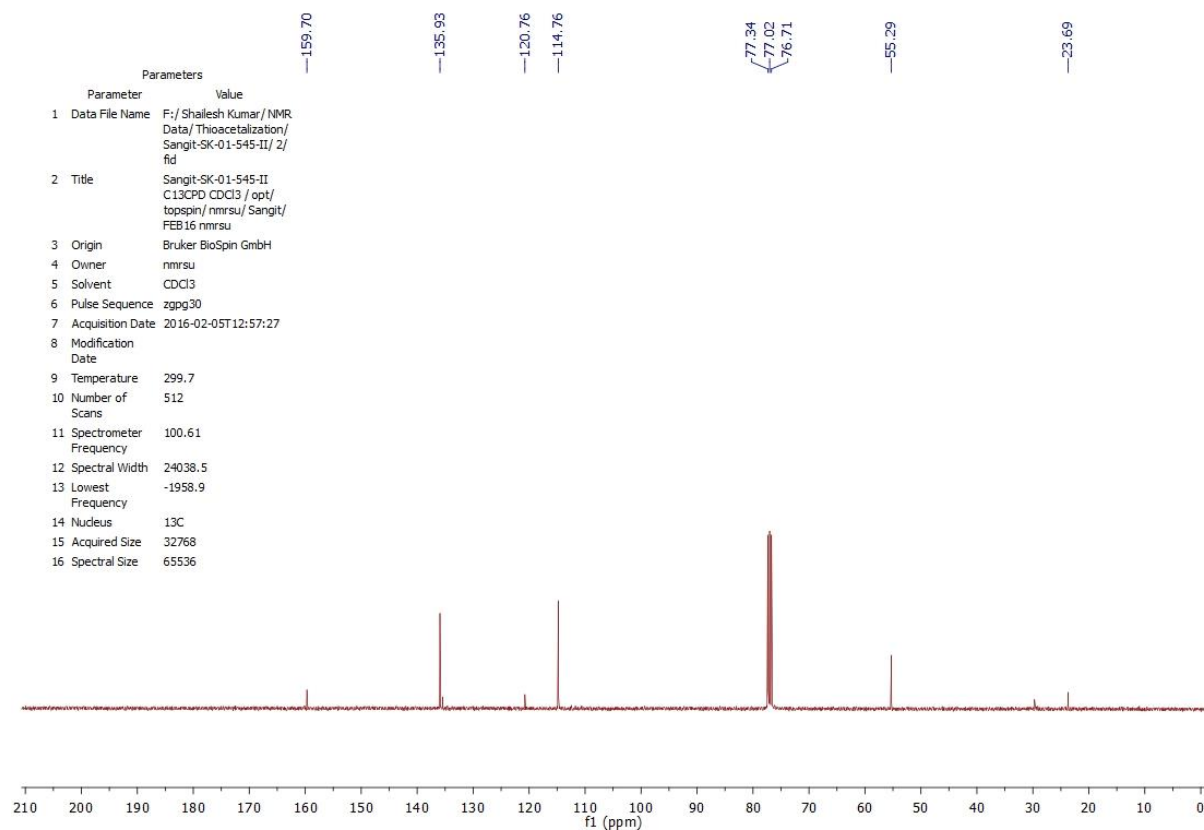

# S28 <sup>77</sup>Se NMR of 25

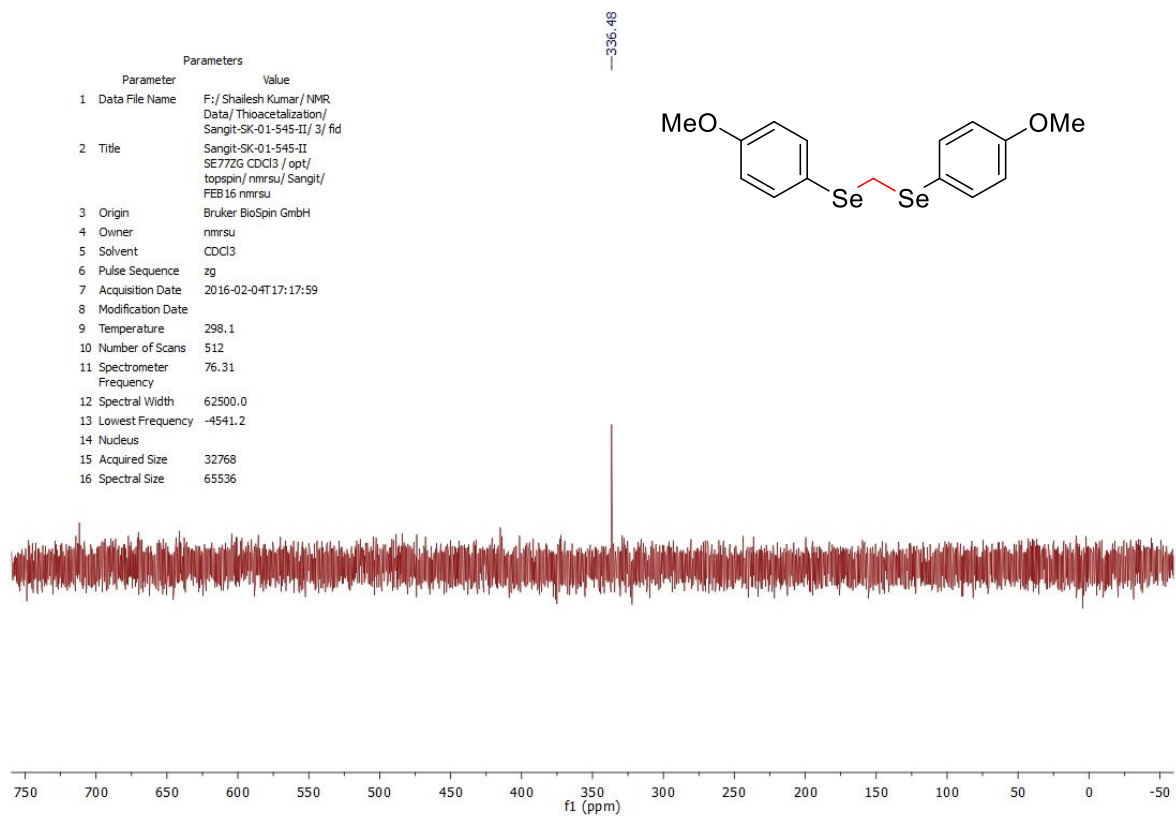

S29 <sup>1</sup>H NMR of 26

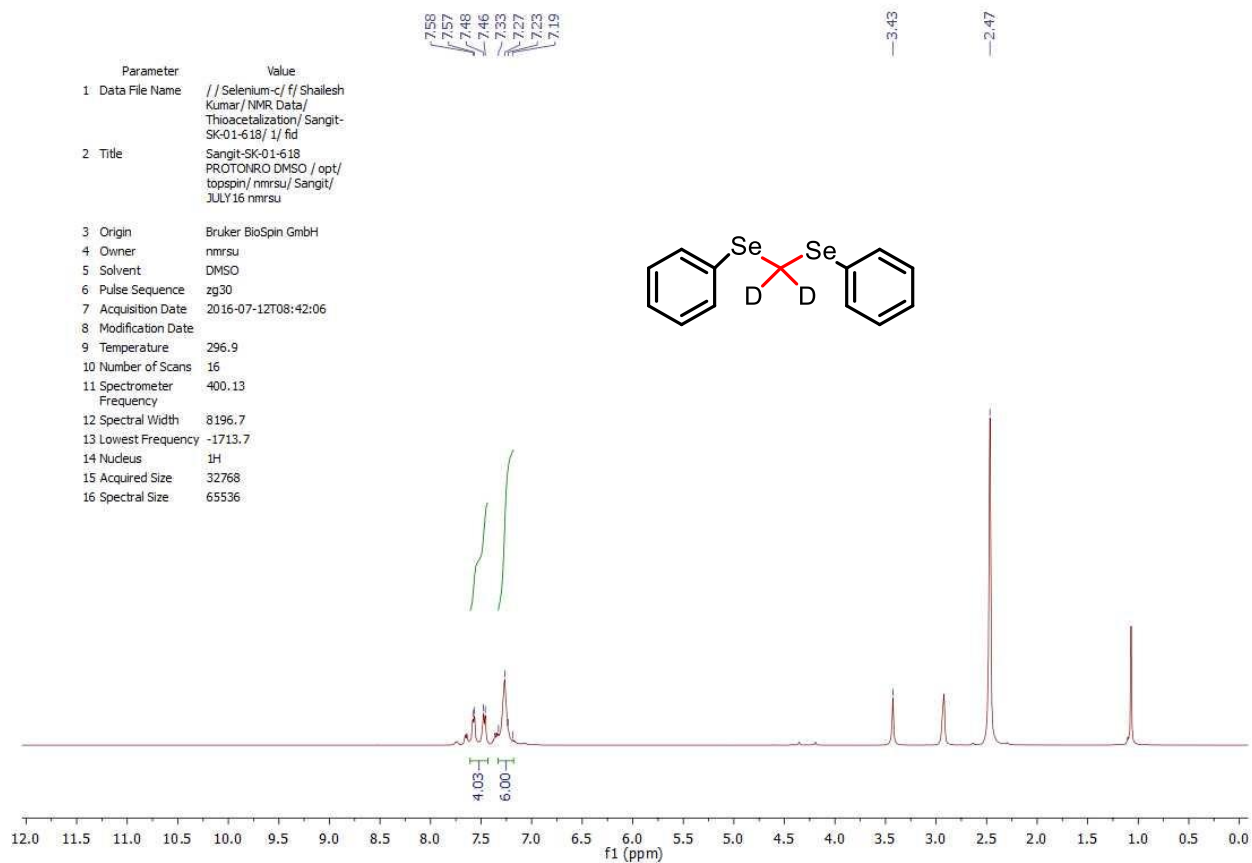

## Qualitative Compound Report

|                               |                           |                      |                                      |
|-------------------------------|---------------------------|----------------------|--------------------------------------|
| <b>Data File</b>              | SK-01-618.D               | <b>Sample Name</b>   | SK-01-618                            |
| <b>Sample Type</b>            |                           | <b>Position</b>      | 4                                    |
| <b>Instrument Name</b>        | GCQTOF                    | <b>User Name</b>     | Agilent-PC\admin                     |
| <b>Acq Method</b>             | IISER_GENERAL_HP5_80.M    | <b>Acquired Time</b> | 13-Jul-16 11:20:53 AM                |
| <b>IRM Calibration Status</b> | Success                   | <b>DA Method</b>     | iISER13MAY 2013.m                    |
| <b>Comment</b>                |                           |                      |                                      |
| <b>Expected Barcode</b>       | <b>Sample Amount</b>      |                      |                                      |
| <b>Dual Inj Vol</b>           | 0.1                       | <b>TuneName</b>      | Install_tune.ei.tune_1_4_13.tune.xml |
| <b>TunePath</b>               | D:\MassHunter\GCMS\1\7200 | <b>TuneDateStamp</b> | 41954.1706                           |
| <b>MSFirmwareVersion</b>      | G.7200.01.09              | <b>OperatorName</b>  | Agilent-PC\admin                     |
| <b>RunCompletedFlag</b>       | TRUE                      |                      |                                      |

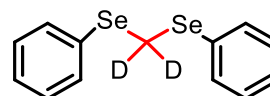

### Compound Table

| Compound Label        | RT    | Mass     | Abund  | Formula        | Tgt Mass | Diff (ppm) | MFG Formula    | DB Formula     |
|-----------------------|-------|----------|--------|----------------|----------|------------|----------------|----------------|
| Cpd 1: C13 H10 D2 Se2 | 6.601 | 317.9504 | 161276 | C13 H10 D2 Se2 | 317.9514 | -3.15      | C13 H10 D2 Se2 | C13 H10 D2 Se2 |

| Compound Label        | m/z      | RT    | Algorithm       | Mass     |
|-----------------------|----------|-------|-----------------|----------|
| Cpd 1: C13 H10 D2 Se2 | 329.9387 | 6.601 | Find By Formula | 317.9504 |

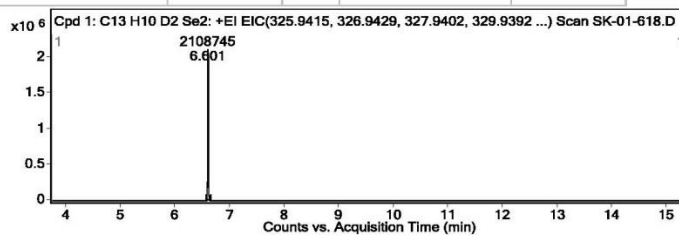

### MS Spectrum

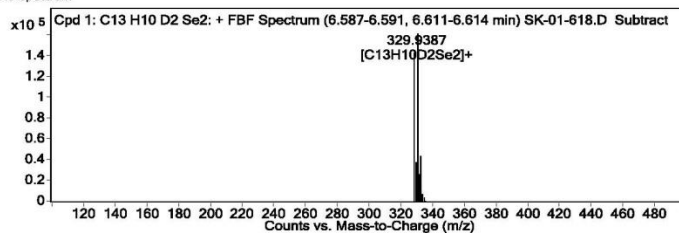

### MS Zoomed Spectrum

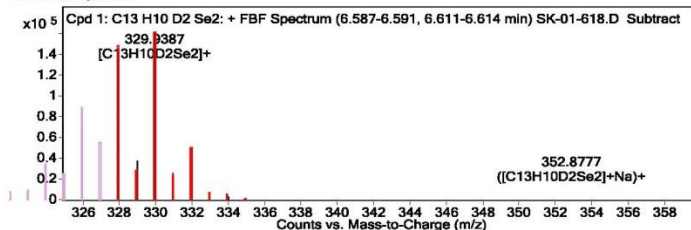

### MS Spectrum Peak List

| m/z      | z | Abund     | Formula     | Ion |
|----------|---|-----------|-------------|-----|
| 327.9395 | 1 | 142599.55 | C13H10D2Se2 | M+  |
| 328.9392 | 1 | 38474.62  | C13H10D2Se2 | M+  |

S31 <sup>1</sup>H & <sup>13</sup>C NMR of 27

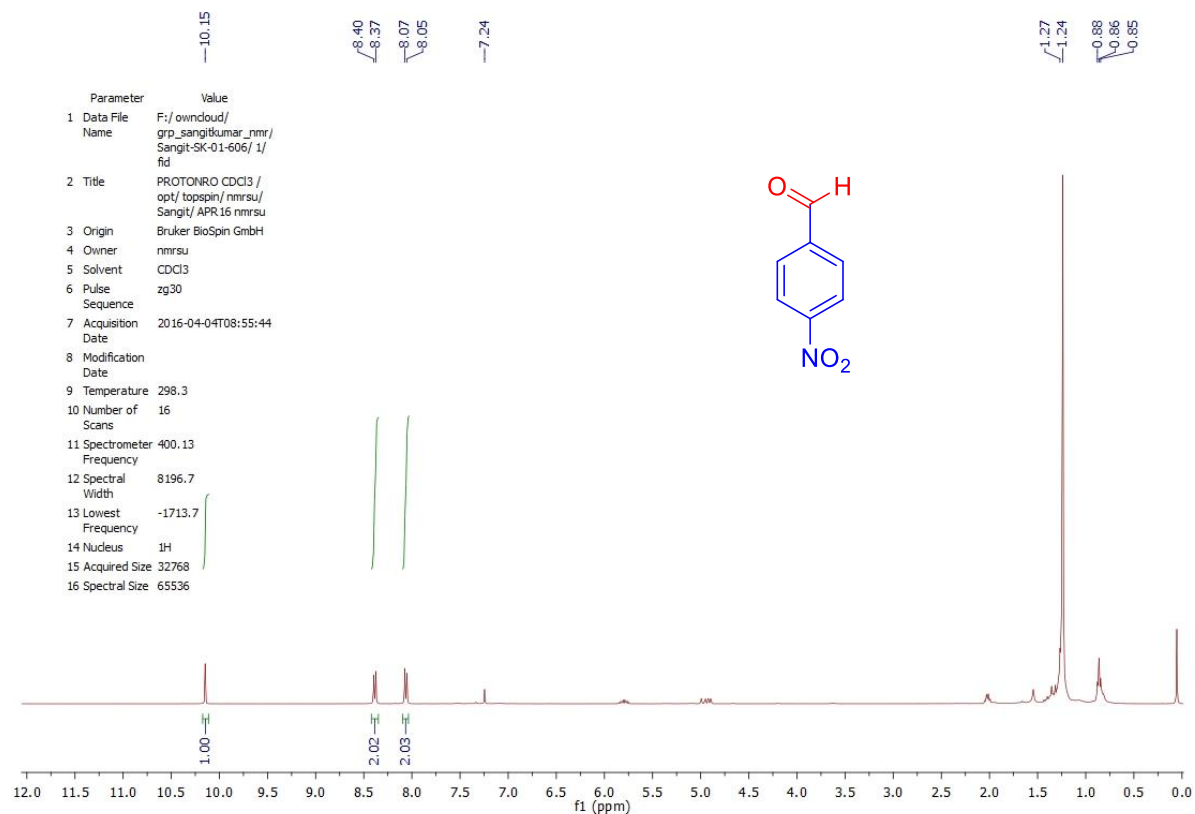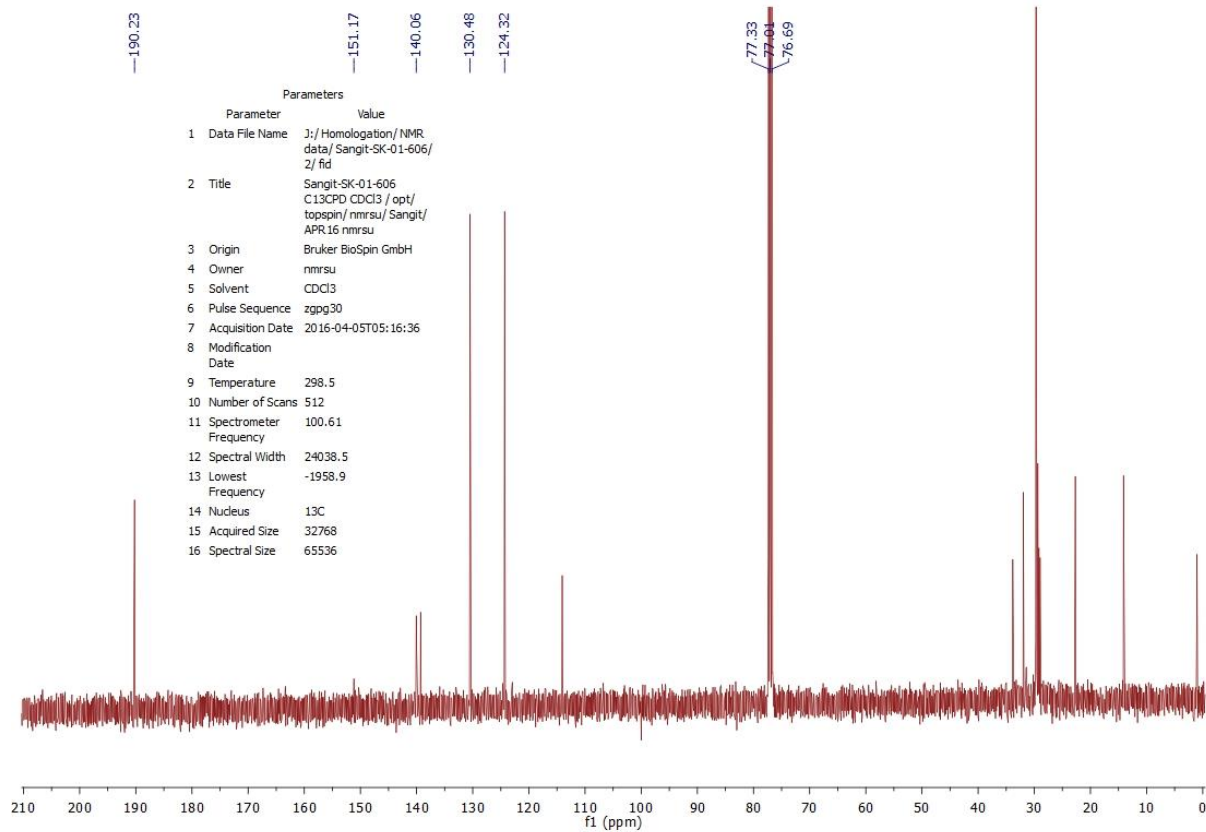

S32 <sup>1</sup>H & <sup>13</sup>C NMR of 28

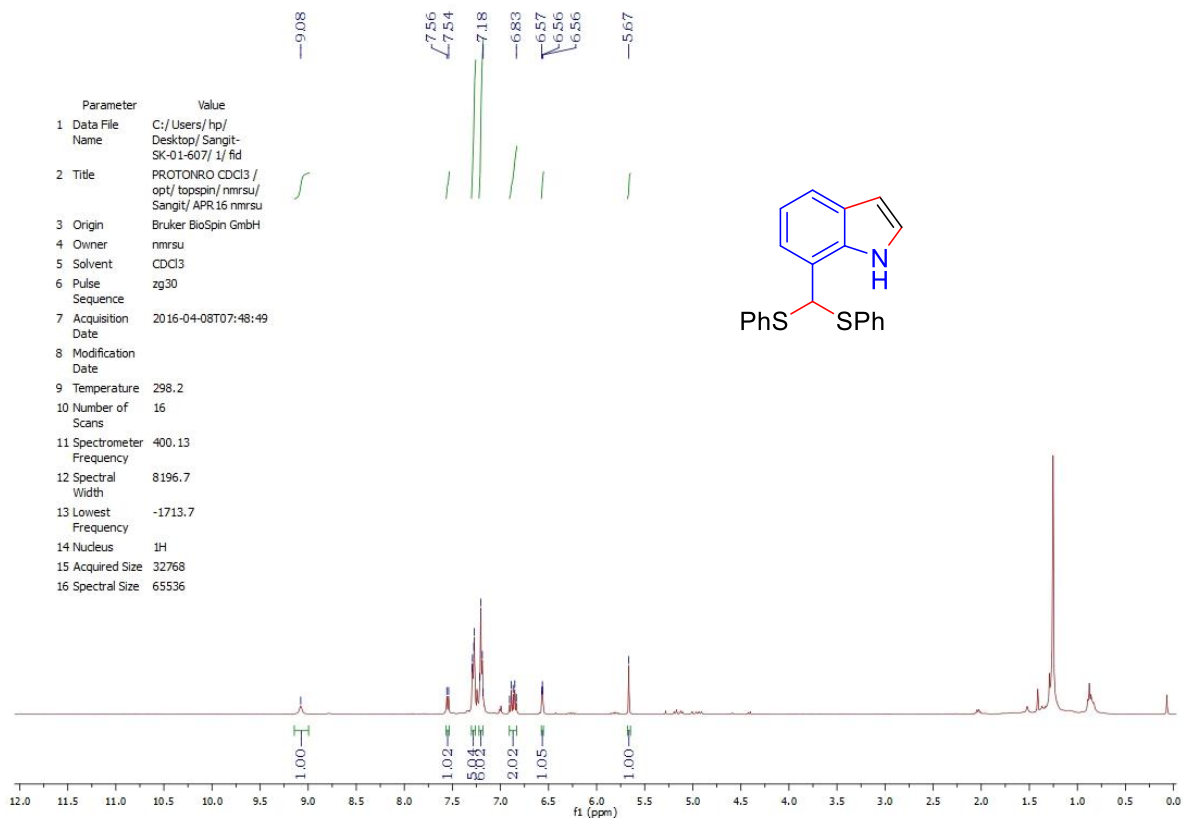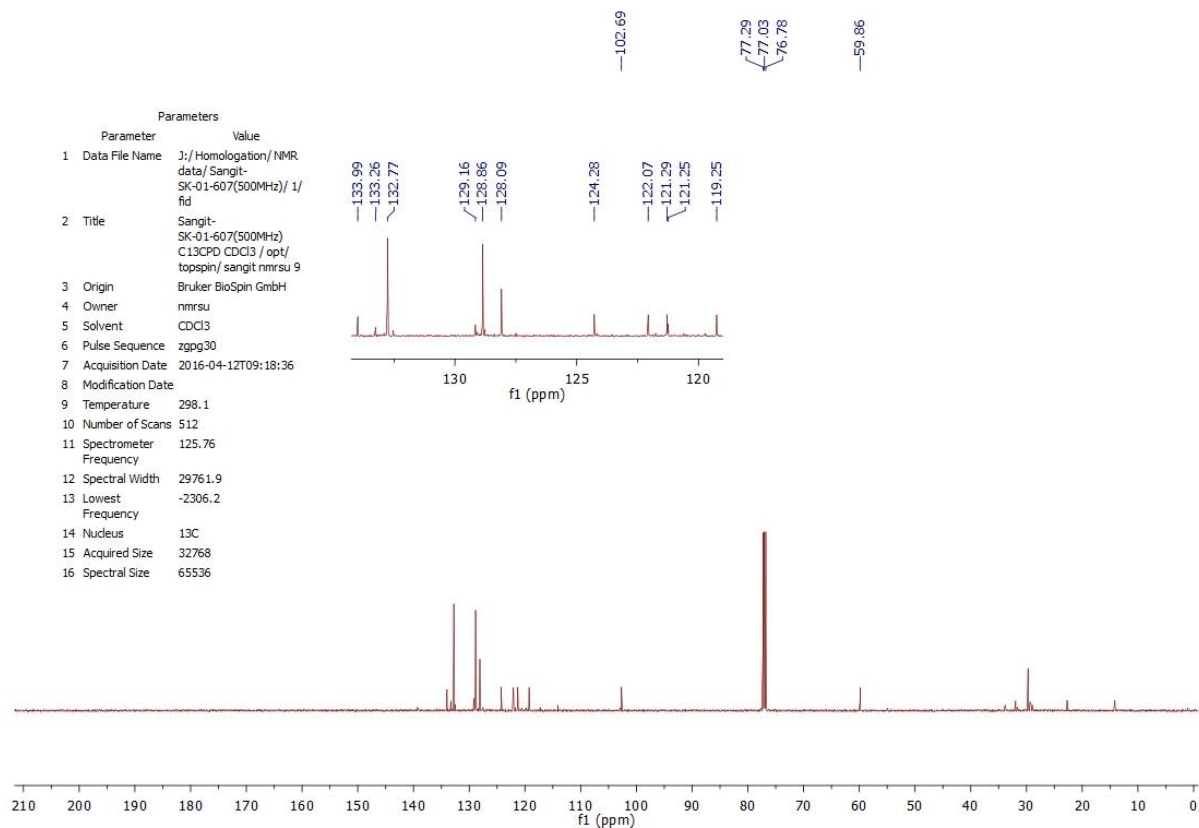



S33 <sup>1</sup>H & <sup>13</sup>C NMR of 29

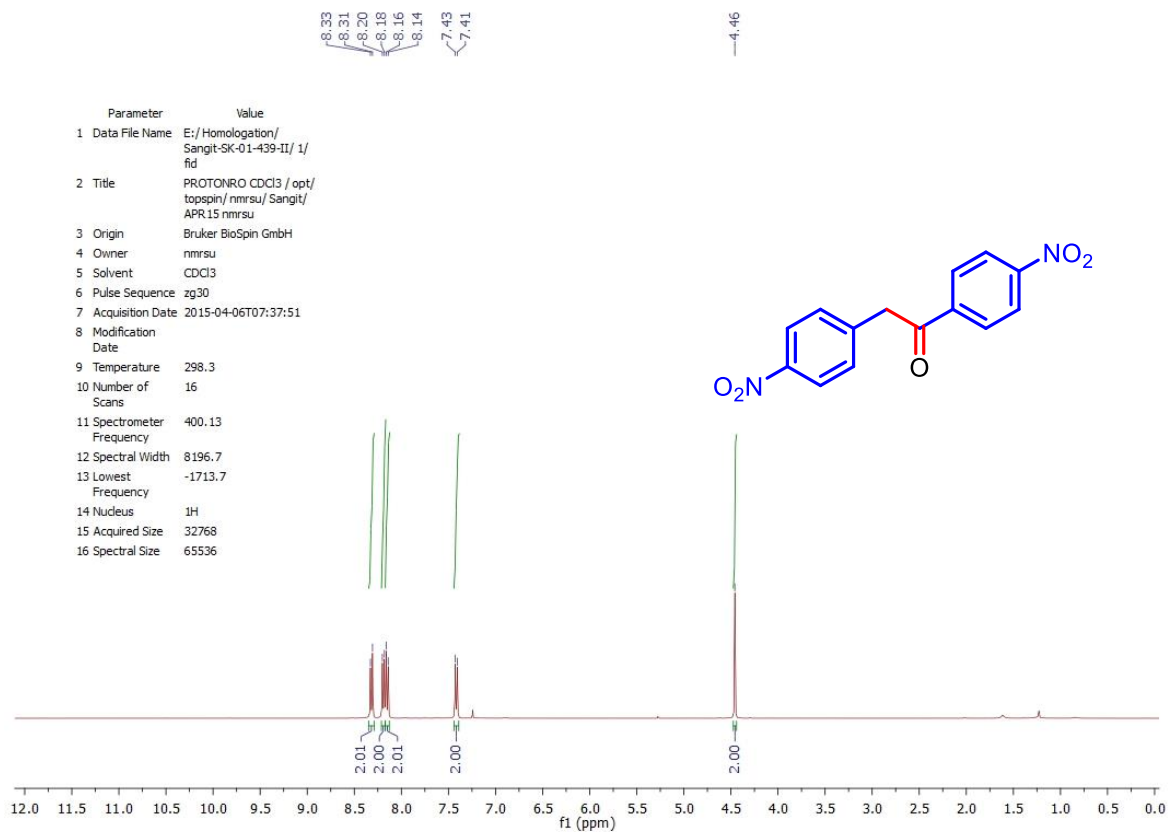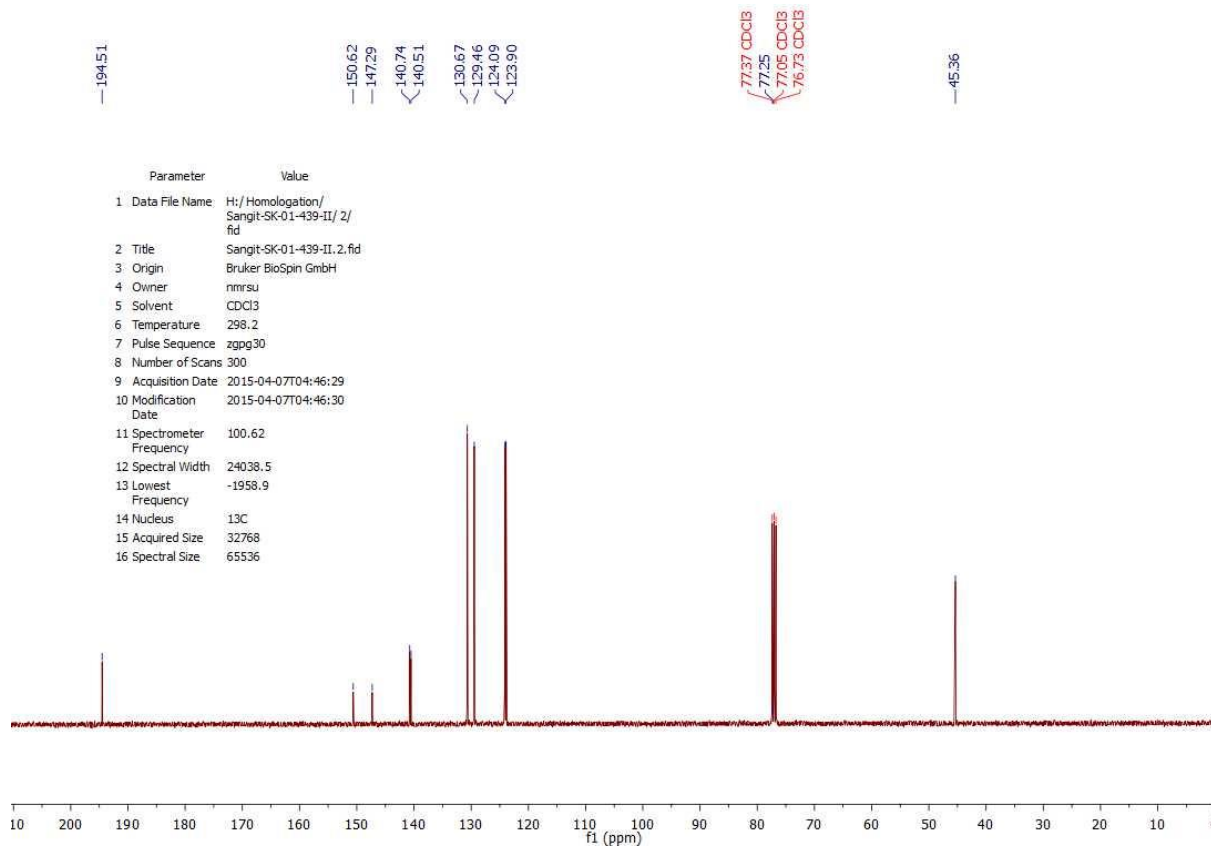

Ortep view of 6 with 40% ellipsoidal probability and hydrogens are omitted for clarity  
(CCDC No. 1487922)

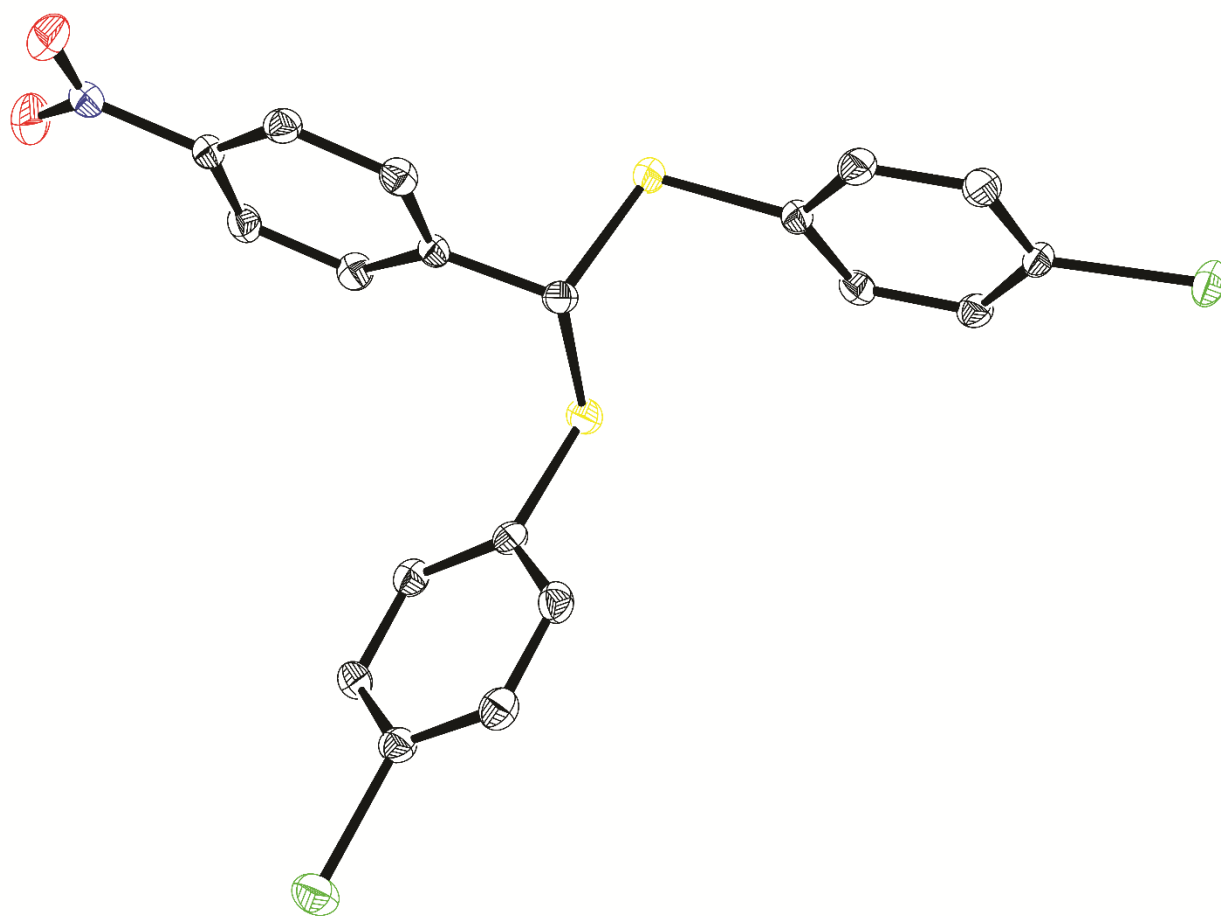

**Table 1 Crystal data and structure refinement for 6**

|                                             |                                                                                |
|---------------------------------------------|--------------------------------------------------------------------------------|
| Identification code                         | SK_543_P (Final)                                                               |
| Empirical formula                           | C <sub>19</sub> H <sub>13</sub> Br <sub>2</sub> NO <sub>2</sub> S <sub>2</sub> |
| Formula weight                              | 511.22                                                                         |
| Temperature/K                               | 187.23                                                                         |
| Crystal system                              | monoclinic                                                                     |
| Space group                                 | P2 <sub>1</sub> /n                                                             |
| a/Å                                         | 7.6546(8)                                                                      |
| b/Å                                         | 29.982(3)                                                                      |
| c/Å                                         | 8.7107(10)                                                                     |
| α/°                                         | 90                                                                             |
| β/°                                         | 108.845(4)                                                                     |
| γ/°                                         | 90                                                                             |
| Volume/Å <sup>3</sup>                       | 1892.0(4)                                                                      |
| Z                                           | 4                                                                              |
| ρ <sub>calc</sub> /g/cm <sup>3</sup>        | 1.7948                                                                         |
| μ/mm <sup>-1</sup>                          | 4.519                                                                          |
| F(000)                                      | 1008.0                                                                         |
| Crystal size/mm <sup>3</sup>                | 0.3 × 0.25 × 0.2                                                               |
| Radiation                                   | Mo Kα (λ = 0.71073)                                                            |
| 2θ range for data collection/°              | 5.12 to 54.96                                                                  |
| Index ranges                                | -9 ≤ h ≤ 9, 0 ≤ k ≤ 38, 0 ≤ l ≤ 11                                             |
| Reflections collected                       | 4339                                                                           |
| Independent reflections                     | 4339 [R <sub>int</sub> = 0.0000, R <sub>sigma</sub> = 0.0268]                  |
| Data/restraints/parameters                  | 4339/0/235                                                                     |
| Goodness-of-fit on F <sup>2</sup>           | 1.069                                                                          |
| Final R indexes [I ≥ 2σ (I)]                | R <sub>1</sub> = 0.0318, wR <sub>2</sub> = 0.0571                              |
| Final R indexes [all data]                  | R <sub>1</sub> = 0.0434, wR <sub>2</sub> = 0.0603                              |
| Largest diff. peak/hole / e Å <sup>-3</sup> | 0.63/-0.53                                                                     |

**Table 2 Fractional Atomic Coordinates (×10<sup>4</sup>) and Equivalent Isotropic Displacement Parameters (Å<sup>2</sup>×10<sup>3</sup>) for 6. U<sub>eq</sub> is defined as 1/3 of the trace of the orthogonalised U<sub>ij</sub> tensor.**

| Atom | x         | y           | z          | U(eq)     |
|------|-----------|-------------|------------|-----------|
| Br2  | 7449.3(4) | 3185.74(9)  | 3196.7(3)  | 29.83(8)  |
| Br1  | 8890.1(4) | 5095.29(10) | -8363.3(4) | 33.27(8)  |
| S1   | 2001.6(9) | 3384.8(2)   | -4134.4(8) | 26.13(15) |
| S2   | 3546.1(9) | 4227.3(2)   | -4770.3(8) | 24.80(14) |
| O1   | -2165(3)  | 3487.1(7)   | -12705(2)  | 41.2(5)   |
| C17  | 74(3)     | 3325.8(8)   | -10250(3)  | 22.0(5)   |
| C5   | 7323(3)   | 4821.9(8)   | -7316(3)   | 23.0(5)   |
| N1   | -1034(3)  | 3209.4(7)   | -11930(3)  | 27.0(5)   |
| C2   | 5028(3)   | 4436.2(8)   | -5820(3)   | 21.9(5)   |
| C8   | 3672(3)   | 3352.9(8)   | -2162(3)   | 21.8(5)   |

|     |         |           |           |         |
|-----|---------|-----------|-----------|---------|
| C16 | -115(3) | 3747.2(8) | -9672(3)  | 23.9(5) |
| O2  | -799(3) | 2847.9(7) | -12457(2) | 39.6(5) |
| C13 | 3952(3) | 3709.8(8) | -1084(3)  | 22.7(5) |
| C15 | 944(3)  | 3856.0(8) | -8098(3)  | 23.1(5) |
| C18 | 1272(3) | 3011.5(8) | -9312(3)  | 22.6(5) |
| C12 | 5125(3) | 3666.0(8) | 493(3)    | 22.7(5) |
| C1  | 3276(3) | 3642.5(8) | -5362(3)  | 21.0(5) |
| C7  | 4318(3) | 4734.5(8) | -7090(3)  | 24.0(5) |
| C9  | 4580(3) | 2950.7(8) | -1649(3)  | 24.7(5) |
| C14 | 2159(3) | 3548.1(8) | -7117(3)  | 19.8(5) |
| C6  | 5472(3) | 4932.4(8) | -7842(3)  | 23.8(5) |
| C11 | 5977(3) | 3256.5(8) | 993(3)    | 21.3(5) |
| C19 | 2303(3) | 3126.0(8) | -7742(3)  | 22.3(5) |
| C4  | 8064(4) | 4527.6(8) | -6066(3)  | 25.6(5) |
| C3  | 6902(4) | 4336.4(8) | -5307(3)  | 25.6(5) |
| C10 | 5731(3) | 2900.0(8) | -61(3)    | 24.2(5) |

**Table 3 Anisotropic Displacement Parameters ( $\text{\AA}^2 \times 10^3$ ) for 6. The Anisotropic displacement factor exponent takes the form:  $-\pi^2[h^2a^{*2}U_{11}+2hka^*b^*U_{12}+\dots]$ .**

| Atom | U <sub>11</sub> | U <sub>22</sub> | U <sub>33</sub> | U <sub>12</sub> | U <sub>13</sub> | U <sub>23</sub> |
|------|-----------------|-----------------|-----------------|-----------------|-----------------|-----------------|
| Br2  | 26.34(14)       | 35.18(15)       | 21.23(14)       | 1.24(11)        | -1.63(10)       | -0.60(11)       |
| Br1  | 26.63(14)       | 37.34(16)       | 37.30(17)       | -0.34(11)       | 12.32(12)       | 9.99(12)        |
| S1   | 22.6(3)         | 34.5(4)         | 18.7(3)         | -7.9(3)         | 3.1(2)          | 3.0(3)          |
| S2   | 31.9(3)         | 22.7(3)         | 22.0(3)         | -4.0(3)         | 11.7(3)         | -3.2(2)         |
| O1   | 43.8(12)        | 45.8(12)        | 25.2(11)        | 0.2(10)         | -0.9(9)         | 7.2(9)          |
| C17  | 22.4(12)        | 26.2(13)        | 17.4(12)        | -5.3(10)        | 6.7(10)         | 0.2(10)         |
| C5   | 25.7(13)        | 21.1(12)        | 23.4(13)        | -3.7(10)        | 9.4(10)         | -3.6(10)        |
| N1   | 28.3(11)        | 32.2(13)        | 21.1(11)        | -8.4(10)        | 8.6(9)          | 2.9(10)         |
| C2   | 28.3(13)        | 16.9(12)        | 20.1(13)        | -5.4(10)        | 7.4(10)         | -5.9(9)         |
| C8   | 19.7(12)        | 27.7(13)        | 17.5(12)        | -4.2(10)        | 5.2(10)         | 2(1)            |
| C16  | 23.4(12)        | 27.0(13)        | 20.8(13)        | 1.8(10)         | 6.3(10)         | 4.9(10)         |
| O2   | 51.6(13)        | 34.9(11)        | 27.5(11)        | -10.0(9)        | 6.3(9)          | -8.7(9)         |
| C13  | 23.9(12)        | 19.9(12)        | 24.9(13)        | 1.5(10)         | 8.9(10)         | 4.3(10)         |
| C15  | 25.9(13)        | 21.3(12)        | 23.2(13)        | 1.7(10)         | 9.5(11)         | -1.8(10)        |
| C18  | 25.7(13)        | 20.0(12)        | 23.9(13)        | -3.1(10)        | 10.3(11)        | -2.8(10)        |
| C12  | 26.0(12)        | 21.8(12)        | 20.9(13)        | -4.3(10)        | 8.5(10)         | -4.1(10)        |
| C1   | 22.1(12)        | 20.3(12)        | 21.4(13)        | -3.2(10)        | 8.1(10)         | -1.2(10)        |
| C7   | 22.7(12)        | 24.1(13)        | 23.0(13)        | 0.6(10)         | 4.2(10)         | -0.9(10)        |
| C9   | 27.5(13)        | 23.2(13)        | 23.3(13)        | -3.9(10)        | 7.9(11)         | -3.7(10)        |
| C14  | 20.1(12)        | 23.5(12)        | 17.1(12)        | -2.8(9)         | 7.9(10)         | 1.3(9)          |

|     |          |          |          |          |         |          |
|-----|----------|----------|----------|----------|---------|----------|
| C6  | 26.7(13) | 22.3(12) | 21.8(13) | 0.7(10)  | 6.7(11) | 4.7(10)  |
| C11 | 17.4(11) | 26.9(13) | 17.1(12) | -3.3(10) | 2.2(9)  | -0(1)    |
| C19 | 20.9(12) | 22.0(12) | 24.1(13) | 2.4(10)  | 7.2(10) | 3.3(10)  |
| C4  | 23.6(12) | 25.2(13) | 25.8(14) | 2.8(10)  | 4.8(11) | -0.8(11) |
| C3  | 31.8(14) | 21.3(12) | 20.8(13) | 0.9(10)  | 4.5(11) | 1.6(10)  |
| C10 | 24.0(12) | 21.4(12) | 25.4(14) | 0.8(10)  | 5.3(11) | 1.1(10)  |

**Table 4 Bond Lengths for 6**

| Atom | Atom | Length/Å | Atom | Atom | Length/Å |
|------|------|----------|------|------|----------|
| Br2  | C11  | 1.898(2) | C2   | C3   | 1.390(4) |
| Br1  | C5   | 1.911(2) | C8   | C13  | 1.393(3) |
| S1   | C8   | 1.783(2) | C8   | C9   | 1.391(4) |
| S1   | C1   | 1.835(2) | C16  | C15  | 1.387(3) |
| S2   | C2   | 1.784(3) | C13  | C12  | 1.383(3) |
| S2   | C1   | 1.820(2) | C15  | C14  | 1.391(3) |
| O1   | N1   | 1.233(3) | C18  | C19  | 1.383(3) |
| C17  | N1   | 1.477(3) | C12  | C11  | 1.392(3) |
| C17  | C16  | 1.385(3) | C1   | C14  | 1.517(3) |
| C17  | C18  | 1.383(3) | C7   | C6   | 1.391(4) |
| C5   | C6   | 1.381(3) | C9   | C10  | 1.387(4) |
| C5   | C4   | 1.374(4) | C14  | C19  | 1.396(3) |
| N1   | O2   | 1.213(3) | C11  | C10  | 1.382(3) |
| C2   | C7   | 1.390(3) | C4   | C3   | 1.391(4) |

**Table 5. Bond Angles for 6**

| Atom | Atom | Atom | Angle/°    | Atom | Atom | Atom | Angle/°    |
|------|------|------|------------|------|------|------|------------|
| C1   | S1   | C8   | 103.51(11) | C14  | C15  | C16  | 120.8(2)   |
| C1   | S2   | C2   | 103.03(11) | C19  | C18  | C17  | 118.2(2)   |
| C16  | C17  | N1   | 118.8(2)   | C11  | C12  | C13  | 118.9(2)   |
| C18  | C17  | N1   | 118.9(2)   | S2   | C1   | S1   | 105.87(12) |
| C18  | C17  | C16  | 122.3(2)   | C14  | C1   | S1   | 106.00(16) |
| C6   | C5   | Br1  | 118.28(19) | C14  | C1   | S2   | 116.14(17) |
| C4   | C5   | Br1  | 119.45(19) | C6   | C7   | C2   | 120.4(2)   |
| C4   | C5   | C6   | 122.3(2)   | C10  | C9   | C8   | 120.4(2)   |
| C17  | N1   | O1   | 117.4(2)   | C1   | C14  | C15  | 122.9(2)   |
| O2   | N1   | O1   | 124.1(2)   | C19  | C14  | C15  | 118.9(2)   |
| O2   | N1   | C17  | 118.6(2)   | C19  | C14  | C1   | 118.2(2)   |
| C7   | C2   | S2   | 118.94(19) | C7   | C6   | C5   | 118.7(2)   |

|     |     |     |            |     |     |     |            |
|-----|-----|-----|------------|-----|-----|-----|------------|
| C3  | C2  | S2  | 121.37(19) | C12 | C11 | Br2 | 118.70(18) |
| C3  | C2  | C7  | 119.5(2)   | C10 | C11 | Br2 | 119.65(18) |
| C13 | C8  | S1  | 120.97(19) | C10 | C11 | C12 | 121.6(2)   |
| C9  | C8  | S1  | 118.97(19) | C14 | C19 | C18 | 121.3(2)   |
| C9  | C8  | C13 | 119.8(2)   | C3  | C4  | C5  | 118.5(2)   |
| C15 | C16 | C17 | 118.5(2)   | C4  | C3  | C2  | 120.7(2)   |
| C12 | C13 | C8  | 120.3(2)   | C11 | C10 | C9  | 118.9(2)   |

**Table 6. Hydrogen Atom Coordinates ( $\text{\AA} \times 10^4$ ) and Isotropic Displacement Parameters ( $\text{\AA}^2 \times 10^3$ ) for 6**

| Atom | x       | y         | z         | U(eq)   |
|------|---------|-----------|-----------|---------|
| H16  | -950(3) | 3957.2(8) | -10339(3) | 28.7(6) |
| H13  | 3334(3) | 3984.6(8) | -1434(3)  | 27.2(6) |
| H15  | 837(3)  | 4144.5(8) | -7686(3)  | 27.7(6) |
| H18  | 1383(3) | 2724.6(8) | -9734(3)  | 27.2(6) |
| H12  | 5346(3) | 3911.1(8) | 1222(3)   | 27.2(6) |
| H1   | 4520(3) | 3500.2(8) | -5102(3)  | 25.2(6) |
| H7   | 3038(3) | 4803.6(8) | -7446(3)  | 28.8(6) |
| H9   | 4410(3) | 2709.5(8) | -2389(3)  | 29.7(6) |
| H6   | 4995(3) | 5139.6(8) | -8702(3)  | 28.6(6) |
| H19  | 3125(3) | 2913.4(8) | -7077(3)  | 26.8(6) |
| H4   | 9341(4) | 4456.3(8) | -5727(3)  | 30.8(7) |
| H3   | 7395(4) | 4135.6(8) | -4430(3)  | 30.7(7) |
| H10  | 6341(3) | 2624.6(8) | 295(3)    | 29.1(6) |

Ortep view of 14 with 40% ellipsoidal probability and hydrogens are omitted for clarity (CCDC No. 1487921)

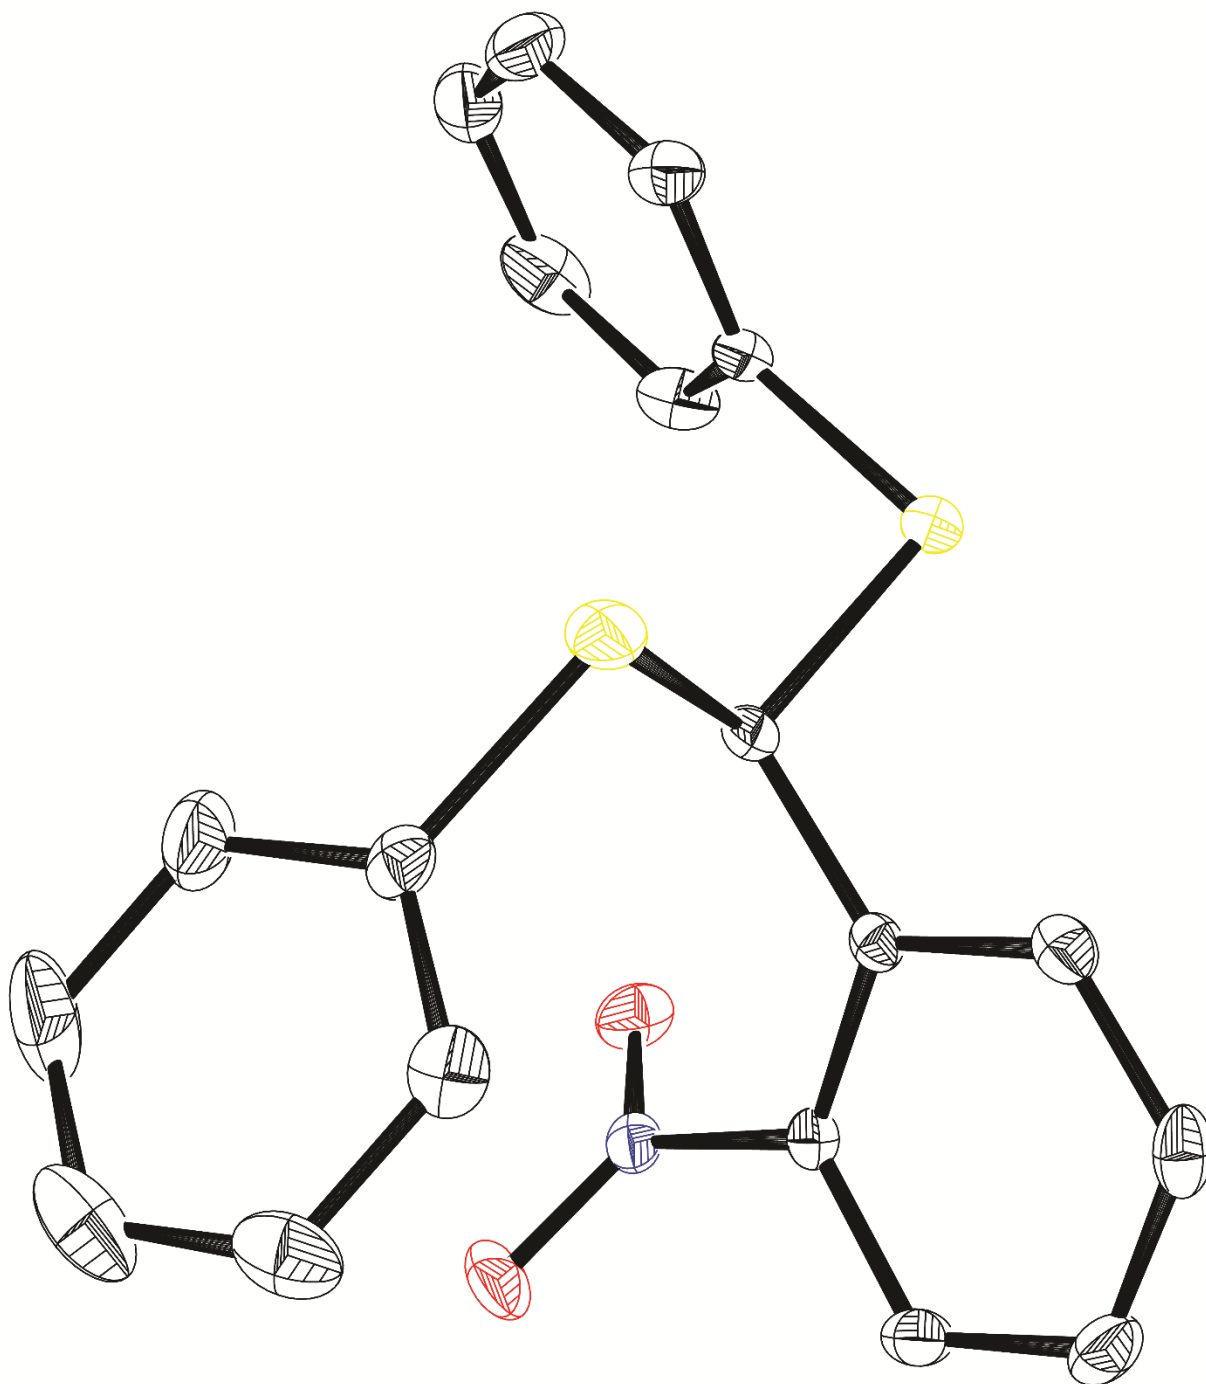

**Table 1 Crystal data and structure refinement for 14**

|                                             |                                                                |
|---------------------------------------------|----------------------------------------------------------------|
| Identification code                         | SK_01_489 (Final)                                              |
| Empirical formula                           | C <sub>19</sub> H <sub>15</sub> NO <sub>2</sub> S <sub>2</sub> |
| Formula weight                              | 353.44                                                         |
| Temperature/K                               | 140.0                                                          |
| Crystal system                              | monoclinic                                                     |
| Space group                                 | P2 <sub>1</sub> /c                                             |
| a/Å                                         | 16.385(2)                                                      |
| b/Å                                         | 13.037(2)                                                      |
| c/Å                                         | 8.2869(14)                                                     |
| α/°                                         | 90                                                             |
| β/°                                         | 103.740(6)                                                     |
| γ/°                                         | 90                                                             |
| Volume/Å <sup>3</sup>                       | 1719.6(5)                                                      |
| Z                                           | 4                                                              |
| ρ <sub>calc</sub> /cm <sup>3</sup>          | 1.3652                                                         |
| μ/mm <sup>-1</sup>                          | 0.320                                                          |
| F(000)                                      | 736.0                                                          |
| Crystal size/mm <sup>3</sup>                | 0.25 × 0.2 × 0.15                                              |
| Radiation                                   | Mo Kα (λ = 0.71073)                                            |
| 2θ range for data collection/°              | 5.12 to 47.06                                                  |
| Index ranges                                | -18 ≤ h ≤ 17, -14 ≤ k ≤ 14, -7 ≤ l ≤ 9                         |
| Reflections collected                       | 8283                                                           |
| Independent reflections                     | 2559 [R <sub>int</sub> = 0.0607, R <sub>sigma</sub> = 0.0552]  |
| Data/restraints/parameters                  | 2559/0/216                                                     |
| Goodness-of-fit on F <sup>2</sup>           | 1.051                                                          |
| Final R indexes [I ≥ 2σ (I)]                | R <sub>1</sub> = 0.0381, wR <sub>2</sub> = 0.0760              |
| Final R indexes [all data]                  | R <sub>1</sub> = 0.0623, wR <sub>2</sub> = 0.0844              |
| Largest diff. peak/hole / e Å <sup>-3</sup> | 0.38/-0.38                                                     |

**Table 2 Fractional Atomic Coordinates (×10<sup>4</sup>) and Equivalent Isotropic Displacement Parameters (Å<sup>2</sup>×10<sup>3</sup>) for 14. U<sub>eq</sub> is defined as 1/3 of of the trace of the orthogonalised U<sub>ij</sub> tensor.**

| Atom | x          | y           | z         | U(eq)   |
|------|------------|-------------|-----------|---------|
| S1   | 8612.1(4)  | 9076.8(5)   | 1423.9(9) | 25.4(2) |
| S2   | 8325.7(4)  | 9973.7(6)   | 4568.9(9) | 28.8(2) |
| O1   | 5456.9(10) | 10437.8(14) | 1615(2)   | 31.4(5) |
| O2   | 6317.6(10) | 10303.3(14) | -10(2)    | 28.2(5) |



|     |             |             |         |          |
|-----|-------------|-------------|---------|----------|
| C15 | 6299.0(13)  | 8992.6(18)  | 1869(3) | 15.9(6)  |
| C19 | 7366.3(15)  | 7830.7(19)  | 3122(3) | 21.3(6)  |
| C14 | 7153.2(13)  | 8794.2(18)  | 2428(3) | 15.6(6)  |
| N1  | 6008.6(12)  | 9984.9(16)  | 1112(3) | 19.7(5)  |
| C1  | 7822.2(13)  | 9588.6(19)  | 2431(3) | 18.5(6)  |
| C2  | 9085.0(14)  | 10244.3(19) | 995(3)  | 20.7(6)  |
| C8  | 7450.7(14)  | 10615(2)    | 5043(3) | 23.2(6)  |
| C3  | 9807.5(14)  | 10598(2)    | 2081(3) | 26.3(7)  |
| C7  | 8746.6(15)  | 10791(2)    | -434(4) | 32.1(7)  |
| C11 | 6067(2)     | 11601(3)    | 5701(4) | 50.4(9)  |
| C10 | 6180.1(17)  | 10573(3)    | 6002(4) | 39.2(8)  |
| C13 | 7331.7(19)  | 11652(2)    | 4738(4) | 42.1(8)  |
| C18 | 6762.5(15)  | 7113(2)     | 3222(3) | 25.1(6)  |
| C6  | 9124.4(17)  | 11693(2)    | -775(4) | 39.5(8)  |
| C5  | 9838.5(17)  | 12048(2)    | 331(4)  | 36.3(8)  |
| C16 | 5679.7(15)  | 8292(2)     | 1995(3) | 23.0(6)  |
| C17 | 5913.3(15)  | 7338(2)     | 2660(3) | 26.7(7)  |
| C12 | 6639(2)     | 12137(3)    | 5068(5) | 56.3(10) |
| C9  | 6867.8(16)  | 10078(2)    | 5679(3) | 28.9(7)  |
| C4  | 10177.2(16) | 11500(2)    | 1742(4) | 34.3(8)  |

**Table 3 Anisotropic Displacement Parameters ( $\text{\AA}^2 \times 10^3$ ) for 14. The Anisotropic displacement factor exponent takes the form:  $-2\pi^2[h^2a^{*2}U_{11}+2hka^*b^*U_{12}+\dots]$ .**

| Atom | $U_{11}$ | $U_{22}$ | $U_{33}$ | $U_{12}$ | $U_{13}$ | $U_{23}$ |
|------|----------|----------|----------|----------|----------|----------|
| S1   | 19.4(3)  | 22.0(4)  | 37.8(5)  | -1.3(3)  | 12.6(3)  | -4.8(3)  |
| S2   | 18.6(3)  | 37.0(4)  | 27.5(4)  | -0.4(3)  | -0.9(3)  | -9.4(3)  |
| O1   | 23.3(10) | 30.8(12) | 37.3(13) | 12.5(9)  | 1.4(9)   | -7.0(9)  |
| O2   | 25.9(10) | 26.5(11) | 31.0(12) | -2.1(8)  | 4.2(9)   | 11.4(9)  |
| C15  | 19.4(13) | 14.2(14) | 14.0(14) | 1.1(11)  | 4.0(11)  | 0.2(11)  |
| C19  | 20.1(13) | 22.6(16) | 20.4(16) | 3.6(11)  | 3.4(11)  | -1.1(12) |
| C14  | 16.7(13) | 16.8(15) | 13.5(14) | 1.4(10)  | 3.9(11)  | -2.4(11) |
| N1   | 15.3(11) | 18.4(12) | 21.8(13) | 0.8(9)   | -2.7(10) | -4.3(10) |
| C1   | 13.8(12) | 18.0(14) | 22.6(16) | 2.4(10)  | 2.6(11)  | -1.4(12) |
| C2   | 14.8(13) | 22.3(16) | 25.8(16) | 0.5(11)  | 6.4(12)  | -3.1(12) |
| C8   | 24.5(14) | 24.5(17) | 18.5(16) | -3.9(12) | 1.2(12)  | -5.6(12) |
| C3   | 21.9(14) | 31.2(17) | 26.3(17) | -2.1(12) | 6.5(12)  | -0.9(13) |
| C7   | 21.8(14) | 42(2)    | 31.8(19) | 2.0(13)  | 5.7(13)  | 2.2(15)  |
| C11  | 55(2)    | 64(3)    | 37(2)    | 24.9(18) | 19.8(17) | -2.6(18) |
| C10  | 36.5(17) | 60(2)    | 25.4(18) | 2.1(16)  | 16.5(14) | 0.4(16)  |
| C13  | 57(2)    | 22.4(18) | 54(2)    | -6.4(15) | 27.2(18) | -4.0(15) |

|     |          |          |          |           |          |           |
|-----|----------|----------|----------|-----------|----------|-----------|
| C18 | 41.3(16) | 15.2(15) | 20.0(16) | 4.3(12)   | 9.7(13)  | 4.2(12)   |
| C6  | 38.3(17) | 44(2)    | 41(2)    | 15.1(15)  | 19.0(16) | 19.9(16)  |
| C5  | 39.9(17) | 26.3(18) | 52(2)    | -2.8(14)  | 28.5(17) | -1.6(16)  |
| C16 | 17.1(13) | 28.1(17) | 24.7(16) | -2.7(12)  | 6.5(11)  | -3.5(13)  |
| C17 | 31.7(15) | 22.5(17) | 28.6(18) | -8.8(12)  | 12.3(13) | 0.9(13)   |
| C12 | 87(2)    | 25(2)    | 65(3)    | 18.9(18)  | 34(2)    | -0.2(17)  |
| C9  | 38.3(16) | 28.7(17) | 20.0(16) | -0.2(13)  | 7.5(13)  | 1.7(13)   |
| C4  | 28.4(15) | 37.4(19) | 40(2)    | -11.8(14) | 13.3(15) | -10.7(16) |

**Table 4 Bond Lengths for 14**

| Atom | Atom | Length/Å | Atom | Atom | Length/Å |
|------|------|----------|------|------|----------|
| S1   | C1   | 1.825(2) | C2   | C7   | 1.380(4) |
| S1   | C2   | 1.782(3) | C8   | C13  | 1.381(4) |
| S2   | C1   | 1.838(3) | C8   | C9   | 1.386(3) |
| S2   | C8   | 1.782(3) | C3   | C4   | 1.381(4) |
| O1   | N1   | 1.232(2) | C7   | C6   | 1.389(4) |
| O2   | N1   | 1.232(3) | C11  | C10  | 1.368(4) |
| C15  | C14  | 1.390(3) | C11  | C12  | 1.369(5) |
| C15  | N1   | 1.467(3) | C10  | C9   | 1.379(4) |
| C15  | C16  | 1.387(3) | C13  | C12  | 1.382(4) |
| C19  | C14  | 1.391(3) | C18  | C17  | 1.390(3) |
| C19  | C18  | 1.379(3) | C6   | C5   | 1.383(4) |
| C14  | C1   | 1.508(3) | C5   | C4   | 1.370(4) |
| C2   | C3   | 1.385(3) | C16  | C17  | 1.377(4) |

**Table 5 Bond Angles for 14**

| Atom | Atom | Atom | Angle/°   | Atom | Atom | Atom | Angle/°  |
|------|------|------|-----------|------|------|------|----------|
| C2   | S1   | C1   | 99.67(11) | C7   | C2   | C3   | 119.5(2) |
| C8   | S2   | C1   | 98.06(11) | C13  | C8   | S2   | 120.3(2) |
| N1   | C15  | C14  | 120.3(2)  | C9   | C8   | S2   | 120.7(2) |
| C16  | C15  | C14  | 123.3(2)  | C9   | C8   | C13  | 119.0(3) |
| C16  | C15  | N1   | 116.4(2)  | C4   | C3   | C2   | 120.0(3) |
| C18  | C19  | C14  | 121.6(2)  | C6   | C7   | C2   | 120.3(3) |
| C19  | C14  | C15  | 116.1(2)  | C12  | C11  | C10  | 119.7(3) |
| C1   | C14  | C15  | 123.2(2)  | C9   | C10  | C11  | 120.3(3) |
| C1   | C14  | C19  | 120.6(2)  | C12  | C13  | C8   | 120.0(3) |
| O2   | N1   | O1   | 124.0(2)  | C17  | C18  | C19  | 120.8(2) |

|     |    |    |            |     |     |     |          |
|-----|----|----|------------|-----|-----|-----|----------|
| C15 | N1 | O1 | 117.9(2)   | C5  | C6  | C7  | 119.7(3) |
| C15 | N1 | O2 | 118.08(19) | C4  | C5  | C6  | 119.9(3) |
| S2  | C1 | S1 | 109.63(11) | C17 | C16 | C15 | 119.1(2) |
| C14 | C1 | S1 | 110.03(16) | C16 | C17 | C18 | 119.1(2) |
| C14 | C1 | S2 | 110.41(17) | C13 | C12 | C11 | 120.7(3) |
| C3  | C2 | S1 | 120.0(2)   | C10 | C9  | C8  | 120.4(3) |
| C7  | C2 | S1 | 120.5(2)   | C5  | C4  | C3  | 120.6(3) |

**Table 6 Hydrogen Atom Coordinates ( $\text{\AA} \times 10^4$ ) and Isotropic Displacement Parameters ( $\text{\AA}^2 \times 10^3$ ) for 14**

| Atom | <i>x</i>    | <i>y</i>    | <i>z</i> | U(eq)    |
|------|-------------|-------------|----------|----------|
| H19  | 7942.2(15)  | 7663.1(19)  | 3537(3)  | 25.5(8)  |
| H1   | 7555.9(13)  | 10204.8(19) | 1801(3)  | 22.1(7)  |
| H3   | 10048.9(14) | 10220(2)    | 3058(3)  | 31.6(8)  |
| H7   | 8253.4(15)  | 10549(2)    | -1187(4) | 38.5(9)  |
| H11  | 5594(2)     | 11941(3)    | 5930(4)  | 60.4(11) |
| H10  | 5782.8(17)  | 10198(3)    | 6435(4)  | 47(1)    |
| H13  | 7725.6(19)  | 12031(2)    | 4303(4)  | 50.6(10) |
| H18  | 6928.8(15)  | 6456(2)     | 3682(3)  | 30.1(8)  |
| H6   | 8893.3(17)  | 12065(2)    | -1763(4) | 47.4(10) |
| H5   | 10093.7(17) | 12670(2)    | 113(4)   | 43.6(9)  |
| H16  | 5102.7(15)  | 8468(2)     | 1628(3)  | 27.7(8)  |
| H17  | 5499.7(15)  | 6841(2)     | 2734(3)  | 32.1(8)  |
| H12  | 6559(2)     | 12851(3)    | 4853(5)  | 67.6(12) |
| H9   | 6942.5(16)  | 9364(2)     | 5895(3)  | 34.7(8)  |
| H4   | 10670.7(16) | 11742(2)    | 2495(4)  | 41.2(9)  |

Ortep view of 29 with 40% ellipsoidal probability (CCDC No. 1500695) and hydrogens are omitted for clarity

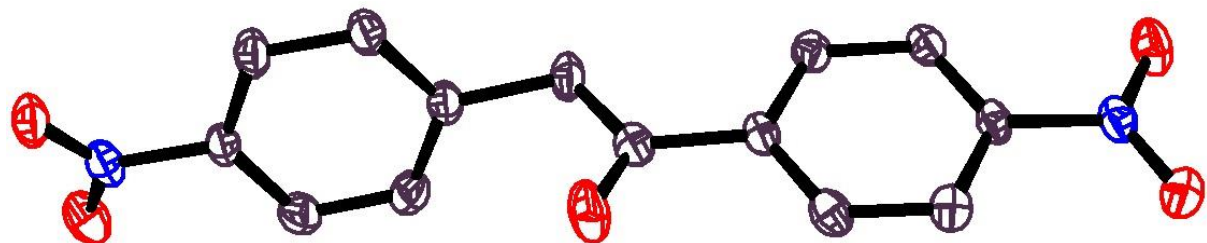

**Table 1 Crystal data and structure refinement for 29**

|                                             |                                                               |
|---------------------------------------------|---------------------------------------------------------------|
| Identification code                         | SK-01-439 (Final)                                             |
| Empirical formula                           | C <sub>14</sub> H <sub>10</sub> N <sub>2</sub> O <sub>5</sub> |
| Formula weight                              | 286.24                                                        |
| Temperature/K                               | 140.02                                                        |
| Crystal system                              | monoclinic                                                    |
| Space group                                 | P2 <sub>1</sub> /c                                            |
| a/Å                                         | 13.122(6)                                                     |
| b/Å                                         | 12.993(6)                                                     |
| c/Å                                         | 7.922(4)                                                      |
| α/°                                         | 90                                                            |
| β/°                                         | 103.660(12)                                                   |
| γ/°                                         | 90                                                            |
| Volume/Å <sup>3</sup>                       | 1312.5(10)                                                    |
| Z                                           | 4                                                             |
| ρ <sub>calc</sub> /g/cm <sup>3</sup>        | 1.449                                                         |
| μ/mm <sup>-1</sup>                          | 0.112                                                         |
| F(000)                                      | 592.0                                                         |
| Crystal size/mm <sup>3</sup>                | 0.2 × 0.15 × 0.1                                              |
| Radiation                                   | MoKα (λ = 0.71073)                                            |
| 2θ range for data collection/°              | 4.476 to 51.602                                               |
| Index ranges                                | -15 ≤ h ≤ 15, -15 ≤ k ≤ 15, -9 ≤ l ≤ 9                        |
| Reflections collected                       | 14834                                                         |
| Independent reflections                     | 2517 [R <sub>int</sub> = 0.0967, R <sub>sigma</sub> = 0.0729] |
| Data/restraints/parameters                  | 2517/0/190                                                    |
| Goodness-of-fit on F <sup>2</sup>           | 1.062                                                         |
| Final R indexes [I ≥ 2σ (I)]                | R <sub>1</sub> = 0.0590, wR <sub>2</sub> = 0.1061             |
| Final R indexes [all data]                  | R <sub>1</sub> = 0.1293, wR <sub>2</sub> = 0.1284             |
| Largest diff. peak/hole / e Å <sup>-3</sup> | 0.20/-0.23                                                    |

**Table 2 Fractional Atomic Coordinates (×10<sup>4</sup>) and Equivalent Isotropic Displacement Parameters (Å<sup>2</sup>×10<sup>3</sup>) for SK-01-439 (Final). U<sub>eq</sub> is defined as 1/3 of the trace of the orthogonalised U<sub>ij</sub> tensor.**

| Atom | x           | y          | z       | U(eq)   |
|------|-------------|------------|---------|---------|
| O5   | 7803.6(14)  | 6045.7(19) | 424(3)  | 43.4(6) |
| O1   | 13194.0(14) | 6649.6(19) | -88(3)  | 45.2(6) |
| N2   | 8269.3(17)  | 6173(2)    | -732(3) | 31.0(6) |
| C12  | 9420.0(19)  | 6264(2)    | -244(4) | 26.5(7) |
| C14  | 11016(2)    | 6230(2)    | 1908(4) | 28.7(7) |
| O2   | 18170.3(15) | 4947(2)    | 4069(3) | 45.3(7) |

|     |             |            |          |         |
|-----|-------------|------------|----------|---------|
| C10 | 11025(2)    | 6447(2)    | -1093(4) | 31.0(8) |
| O4  | 7825.8(14)  | 6210.6(19) | -2272(3) | 44.4(7) |
| O3  | 18331.8(14) | 6597.8(19) | 4306(3)  | 41.0(6) |
| C1  | 12748(2)    | 6402(2)    | 1040(4)  | 29.7(8) |
| C11 | 9943(2)     | 6399(2)    | -1551(4) | 30.3(8) |
| N1  | 17804.1(18) | 5815(2)    | 4024(3)  | 34.7(7) |
| C9  | 11569.2(19) | 6361(2)    | 629(4)   | 25.7(7) |
| C6  | 16650(2)    | 5914(3)    | 3641(3)  | 28.9(8) |
| C7  | 16225(2)    | 6792(3)    | 4142(4)  | 35.9(8) |
| C13 | 9927.0(19)  | 6184(2)    | 1476(4)  | 28.8(7) |
| C8  | 15143(2)    | 6860(3)    | 3854(4)  | 34.9(8) |
| C3  | 14509(2)    | 6059(3)    | 3079(4)  | 30.8(8) |
| C5  | 16045(2)    | 5110(3)    | 2851(4)  | 38.2(9) |
| C4  | 14962(2)    | 5196(3)    | 2560(4)  | 39.7(9) |
| C2  | 13332.2(19) | 6122(3)    | 2840(4)  | 35.6(8) |

**Table 3 Anisotropic Displacement Parameters ( $\text{\AA}^2 \times 10^3$ ) for SK-01-439 (Final). The Anisotropic displacement factor exponent takes the form:  $-2\pi^2[h^2a^{*2}U_{11}+2hka^*b^*U_{12}+\dots]$**

| Atom | $U_{11}$ | $U_{22}$ | $U_{33}$ | $U_{23}$  | $U_{13}$ | $U_{12}$ |
|------|----------|----------|----------|-----------|----------|----------|
| O5   | 25(1)    | 57.4(19) | 50.4(13) | 11.8(13)  | 14(1)    | 1.9(10)  |
| O1   | 27.4(11) | 58.0(18) | 53.4(14) | 13.7(13)  | 16.3(10) | -5.9(11) |
| N2   | 23.9(13) | 25.5(18) | 43.5(16) | -0.9(13)  | 7.8(12)  | 2.7(11)  |
| C12  | 19.1(13) | 19(2)    | 41.3(17) | -0.7(15)  | 7.0(12)  | 1.0(11)  |
| C14  | 26.3(15) | 24(2)    | 34.3(16) | -0.3(15)  | 4.9(12)  | 2.3(12)  |
| O2   | 36.2(13) | 44.7(19) | 57.2(15) | 9.2(13)   | 15.6(11) | 15.6(12) |
| C10  | 29.1(16) | 29(2)    | 38.0(18) | 4.2(16)   | 14.2(13) | -0.4(13) |
| O4   | 29.8(11) | 60(2)    | 40.2(13) | -6.3(12)  | 2.1(10)  | -1.7(11) |
| O3   | 24.7(11) | 45.0(18) | 54.9(14) | -0.7(13)  | 12.7(10) | -7.6(11) |
| C1   | 27.8(15) | 19(2)    | 43.6(18) | -4.0(15)  | 11.6(14) | -3.4(13) |
| C11  | 29.3(16) | 27(2)    | 34.0(17) | 3.9(15)   | 5.9(13)  | -0.1(13) |
| N1   | 25.2(14) | 45(2)    | 35.5(15) | 5.7(15)   | 10.9(11) | 4.6(14)  |
| C9   | 21.8(14) | 18(2)    | 39.0(17) | -1.0(14)  | 9.4(12)  | -0.9(11) |
| C6   | 20.5(14) | 34(2)    | 32.4(16) | 0.9(16)   | 7.6(12)  | 0.2(13)  |
| C7   | 22.4(15) | 35(2)    | 51.0(19) | -3.8(18)  | 10.2(13) | -4.9(14) |
| C13  | 25.1(15) | 25(2)    | 39.1(18) | -2.4(15)  | 12.7(13) | -0.7(12) |
| C8   | 24.7(15) | 31(2)    | 50.8(19) | -6.5(17)  | 11.9(14) | -0.2(14) |
| C3   | 22.0(14) | 36(2)    | 34.0(17) | 0.5(16)   | 6.2(12)  | -1.2(14) |
| C5   | 35.1(18) | 34(2)    | 48(2)    | -9.7(17)  | 14.4(15) | 0.7(15)  |
| C4   | 31.9(17) | 37(2)    | 49(2)    | -12.9(18) | 6.3(14)  | -7.5(15) |
| C2   | 20.3(14) | 45(3)    | 40.5(18) | -0.9(17)  | 6.0(13)  | -5.3(14) |

**Table 4 Bond Lengths for 29**

| Atom | Atom | Length/Å | Atom | Atom | Length/Å |
|------|------|----------|------|------|----------|
| O5   | N2   | 1.226(3) | O3   | N1   | 1.221(3) |
| O1   | C1   | 1.222(3) | C1   | C9   | 1.504(4) |
| N2   | C12  | 1.472(3) | C1   | C2   | 1.496(4) |
| N2   | O4   | 1.222(3) | N1   | C6   | 1.478(3) |
| C12  | C11  | 1.381(4) | C6   | C7   | 1.370(4) |
| C12  | C13  | 1.372(4) | C6   | C5   | 1.371(4) |
| C14  | C9   | 1.389(4) | C7   | C8   | 1.387(4) |
| C14  | C13  | 1.390(4) | C8   | C3   | 1.382(4) |
| O2   | N1   | 1.223(3) | C3   | C4   | 1.377(4) |
| C10  | C11  | 1.381(4) | C3   | C2   | 1.513(4) |
| C10  | C9   | 1.387(4) | C5   | C4   | 1.390(4) |

**Table 5 Bond Angles for 29**

| Atom | Atom | Atom | Angle/°  | Atom | Atom | Atom | Angle/°  |
|------|------|------|----------|------|------|------|----------|
| O5   | N2   | C12  | 118.4(2) | C14  | C9   | C1   | 122.3(3) |
| O4   | N2   | O5   | 123.2(2) | C10  | C9   | C14  | 119.4(2) |
| O4   | N2   | C12  | 118.4(2) | C10  | C9   | C1   | 118.3(2) |
| C11  | C12  | N2   | 118.3(2) | C7   | C6   | N1   | 118.7(3) |
| C13  | C12  | N2   | 118.8(2) | C7   | C6   | C5   | 122.4(3) |
| C13  | C12  | C11  | 122.9(2) | C5   | C6   | N1   | 118.8(3) |
| C9   | C14  | C13  | 120.6(3) | C6   | C7   | C8   | 118.4(3) |
| C11  | C10  | C9   | 120.9(3) | C12  | C13  | C14  | 118.1(2) |
| O1   | C1   | C9   | 119.8(3) | C3   | C8   | C7   | 120.7(3) |
| O1   | C1   | C2   | 122.4(2) | C8   | C3   | C2   | 120.3(3) |
| C2   | C1   | C9   | 117.9(2) | C4   | C3   | C8   | 119.3(3) |
| C10  | C11  | C12  | 118.1(3) | C4   | C3   | C2   | 120.4(3) |
| O2   | N1   | C6   | 117.5(3) | C6   | C5   | C4   | 118.3(3) |
| O3   | N1   | O2   | 124.1(3) | C3   | C4   | C5   | 120.9(3) |
| O3   | N1   | C6   | 118.3(3) | C1   | C2   | C3   | 114.3(2) |

**Table 6 Hydrogen Atom Coordinates ( $\text{\AA}\times 10^4$ ) and Isotropic Displacement Parameters ( $\text{\AA}^2\times 10^3$ ) for 29**

| <b>Atom</b> | <b>x</b> | <b>y</b> | <b>z</b> | <b>U(eq)</b> |
|-------------|----------|----------|----------|--------------|
| H14         | 11386    | 6171     | 3090     | 34           |
| H10         | 11401    | 6541     | -1970    | 37           |
| H11         | 9569     | 6457     | -2730    | 36           |
| H7          | 16662    | 7343     | 4675     | 43           |
| H13         | 9545     | 6099     | 2346     | 35           |
| H8          | 14834    | 7463     | 4193     | 42           |
| H5          | 16358    | 4509     | 2510     | 46           |
| H4          | 14528    | 4652     | 1996     | 48           |
| H2A         | 13074    | 5447     | 3145     | 43           |
| H2B         | 13174    | 6639     | 3660     | 43           |

---



## References

1. A. Kumar, M. S. Rao and V. K. Rao, *Aust. J. Chem.*, 2010, **63**, 135.
2. Q. Ding, B. Cao, J. Yuan, X. Liu and Y. Peng, *Org. Biomol. Chem.*, 2011, **9**, 748.
3. G. A. Blanco and M. T. Baumgartner, *Tetrahedron Lett.*, 2011, **52**, 7061.
4. V. Pace, A. Pelosi, D. Antermite, O. Rosati, M. Curini and W. Holzer, *Chem. Comm.*, 2016, **52**, 2639.
5. K. Bahrami, M. M. Khodaei, M. Tajik and V. Shakibaian, *Chin. Chem. Lett.*, 2012, **23**, 81.
6. G. Bartoli, M. Bosco, R. Dalpozzo, G. Palmieri and E. Marcantoni, *J. Chem. Soc., Perkin Trans. 1*, 1991, 2757.
